1 **Design and characterisation of mutant and wild-type huntingtin proteins produced from a toolkit**  
2 **of scalable eukaryotic expression systems**

3  
4 Rachel J. Harding<sup>1\*</sup>, Peter Loppnau<sup>1</sup>, Suzanne Ackloo<sup>1</sup>, Alexander Lemak<sup>2</sup>, Ashley Hutchinson<sup>1</sup>, Brittany Hunt<sup>1</sup>,  
5 Alex S. Holehouse<sup>3</sup>, Jolene C. Ho<sup>1</sup>, Lixin Fan<sup>4</sup>, Leticia Toledo-Sherman<sup>5</sup>, Alma Seitova<sup>1</sup>, Cheryl H. Arrowsmith<sup>1,2\*</sup>  
6  
7

8 <sup>1</sup>Structural Genomics Consortium, University of Toronto, MaRS South Tower, 101 College Street, Toronto,  
9 Ontario M5G 1L7, Canada.

10 <sup>2</sup>Princess Margaret Cancer Centre and Department of Medical Biophysics, University of Toronto, Toronto, Ontario  
11 M5G 1L7, Canada

12 <sup>3</sup>Department of Biomedical Engineering and Center for Biological Systems Engineering, Washington University in  
13 Saint Louis, Saint Louis, Missouri 63130, USA

14 <sup>4</sup>Basic Science Program, SAXS Core facility of National Cancer Institute, Frederick National Laboratory for  
15 Cancer Research, Frederick, MD 21701, USA

16 <sup>5</sup>CHDI Foundation, 6080 Center Drive, Suite 700, Los Angeles, CA 90045, USA  
17

18 **\*Corresponding authors:**

19  
20 Rachel J. Harding  
21 Tel.: 416-946-3795  
22 Email: [Rachel.harding@utoronto.ca](mailto:Rachel.harding@utoronto.ca)  
23

24 Cheryl Arrowsmith  
25 Tel.: 416-946-0881  
26 E-mail: [Cheryl.Arrowsmith@uhnresearch.ca](mailto:Cheryl.Arrowsmith@uhnresearch.ca)

1 **ABSTRACT (150 WORDS)**

2 The pathogenic Huntington's disease (HD) mutation causes polyglutamine (polyQ) tract expansion of the 348 kDa  
3 HTT protein above a critical threshold of ~35 glutamines. HD mutation effect on HTT is poorly understood, partly  
4 due to difficulties in performing biochemical studies with this large protein. To facilitate such studies, we  
5 generated resources for HTT production in multiple eukaryotic expression systems, comprising constructs with  
6 polyQ lengths representing general population, HD patients, juvenile HD patients and the more extreme  
7 expansions used in some tissue and animal models. These reagents yield milligram quantities of pure HTT  
8 protein. We biophysically characterised HTT samples produced using this HD resource, gleaning insight into the  
9 nature of full-length HTT in its apo form and when bound to its binding partner HAP40. Work outlined in this  
10 manuscript and the tools generated, lay a foundation for further biochemical study of the HTT protein and its  
11 functional interactions with other biomolecules.

## 1 INTRODUCTION

2 Huntington's disease (HD) is a devastating inherited neurodegenerative disorder which causes a range of  
3 progressive behavioural, cognitive and physical symptoms. Incidence of HD varies in different parts of the world  
4 but HD is thought to affect between 0.42 to 17.2 per 100,000 of the population (Kay et al., 2017). There are  
5 currently no disease-modifying therapies available for patients (Ross et al., 2014). HD is hallmarked by an  
6 expansion of a CAG-trinucleotide repeat tract in exon 1 of the *HTT* gene above a critical threshold of ~35 CAG  
7 triplets (Kay, C., Fisher, E. R. & Hayden, M. R., 2014; 1993), translating to a polyglutamine (polyQ) expansion in  
8 the extreme N-terminus of the huntingtin (HTT) protein. PolyQ expanded HTT is thought to be responsible for the  
9 wide-ranging biochemical dysfunction observed in HD models and patients including proteostasis network  
10 impairment (Kim et al., 1999), transcription dysregulation (Seredenina and Luthi-Carter, 2012), mitochondrial  
11 toxicity (Johri et al., 2013; Reddy and Shirendeb, 2012), cellular energy imbalance (Ju et al., 2012), synaptic  
12 dysfunction (Nithianantharajah and Hannan, 2013) and axonal transport impairment (Reddy and Shirendeb,  
13 2012). Although it is thought that HTT is likely a scaffold protein (Rui et al., 2015; Zheng and Diamond, 2012), the  
14 function of HTT, wildtype or polyQ expanded, is still incompletely understood.

15 Biochemical investigation of the role of HTT, in either the wildtype or the disease state, is often dependent on  
16 obtaining large amounts of pure HTT protein of different polyQ lengths. The HTT protein is 3144 amino acids long  
17 (assuming a polyQ stretch of 23 residues, NCBI Reference Sequence: NP\_002102.4), a potentially daunting  
18 prospect for expression and purification given its size. A number of groups have published tools and methods by  
19 which full-length HTT might be expressed and purified from either insect (Li et al., 2006; Seong et al., 2010;  
20 Vijayvargia et al., 2016) or mammalian cells (Huang et al., 2015). However, the tools produced and shared with  
21 the wider community are often limited by the number of different polyQ lengths, the position of an affinity tag or  
22 their tractability for large scale production for biochemical studies. To date, the published literature reporting  
23 experiments with purified HTT protein samples remains limited. Therefore, tools and detailed methods that will  
24 enable biochemical and biophysical studies of HTT by a larger number of researchers should accelerate our  
25 understanding of the function of this elusive protein.

26 Towards this end, we have cloned 28 HTT constructs which allow expression of HTT protein through transient  
27 transfection of mammalian cells or viral transduction of insect or mammalian cells. Constructs have either N or C-  
28 terminal FLAG tags to assist in purification and yields of wildtype and polyQ expanded HTT protein using these  
29 systems are up to one milligram per litre of suspension culture of either insect or mammalian cells. The protein  
30 samples obtained from a simple two-step protocol are highly pure (> 90 % purity) and amenable to numerous  
31 downstream analyses and assays. Our constructs permit production of HTT in complex with the HTT binding  
32 protein HAP40, as well as in its apo form and we have analysed and assessed some of the biophysical properties  
33 of these HTT protein samples. This includes mapping post-translational modifications (PTMs) of the proteins  
34 derived from both insect and mammalian cells, revealing similar modification motifs to those previously reported in  
35 the literature (Hornbeck et al., 2015; Ratovitski et al., 2017; Saudou and Humbert, 2016). We also assessed  
36 thermal stability of HTT samples with different polyQ lengths using differential static light scattering (DSLS) as

1 well as of HTT samples in complex with the HAP40 binding partner protein. Both apo and HAP40 complexed  
2 HTT samples were assessed for monodispersity using size-exclusion chromatography in tandem with multi-angle  
3 light scattering (SEC-MALS). The complex and apo HTT samples were also analysed and compared by SAXS,  
4 including molecular dynamics simulation of the complex sample to generate a Sparse Ensemble Selection (SES)  
5 calculation for HTT-HAP40 which gives insight to the complex structure in solution.

6

## 7 **RESULTS**

### 8 **Cloning of HTT expression constructs**

9 Ligase-independent cloning (LIC) was used to clone the full-length HTT gene into the baculovirus transfer vector  
10 pBMDEL (**Figure 1a**), for expression of proteins in insect cells as well as in mammalian cells. In addition to the  
11 sites for LIC, the vector contains a “stuffer” fragment that includes the SacB gene, allowing negative selection on  
12 5 % (w/v) sucrose, and a truncated VSVG fragment for pseudotyping of the baculovirus. As previously described  
13 for other HTT clones, a 15 bp repetitive element containing a mix of CAG and CAA codons was used to encode  
14 the polyQ expansion, in an effort to help maintain stability and integrity of the DNA sequence through various  
15 generations of vector propagation (Michalik et al., 2001).

16

17 As a ~10 kb gene with multiple repetitive sequence elements, HTT is nontrivial to subclone between different  
18 vectors. We first generated N- and C-terminally FLAG-tagged pBMDEL-HTT constructs lacking part of the exon 1  
19 sequence. Using different polyQ length encoding exon 1 PCR generated cDNAs, our LIC cloning protocol  
20 generated a variety of different polyQ encoding HTT constructs due to the error-prone nature of the recombination  
21 step. By sequencing multiple colonies we identified HTT clones with a variety of polyQ lengths with both N- and  
22 C-terminal FLAG tags (**Figure 1b**). These entry vectors serve as valuable reagents to allow future generation of  
23 even more polyQ length HTT constructs. Additionally, by using a repetitive mix of codons for the polyQ expansion  
24 (CAG CAA CAG CAA CAA)<sub>n</sub>, we expect improved polyQ stability over generations of plasmid, bacmid and  
25 baculovirus propagation compared to repetitive CAG codon tracts (Michalik et al., 2001).

26

27 The resulting HTT open reading frames encoded within this series of constructs have either an N-terminal FLAG-  
28 octapeptide between the START methionine and the N-terminal methionine of the HTT amino acid sequence, or  
29 have the FLAG-octapeptide linked to the extreme C-terminus of HTT via a Gly-Gly-Ser-Gly linker (**Figure 1c**). As  
30 subtle changes to the exon 1 amino acid sequence of the HTT protein have been shown to give rise to changes to  
31 biophysical properties of the protein (Cariulo et al., 2017; Vieweg et al., 2016), the C-terminally FLAG-tagged  
32 constructs allow expression of a “clean” exon 1 sequence.

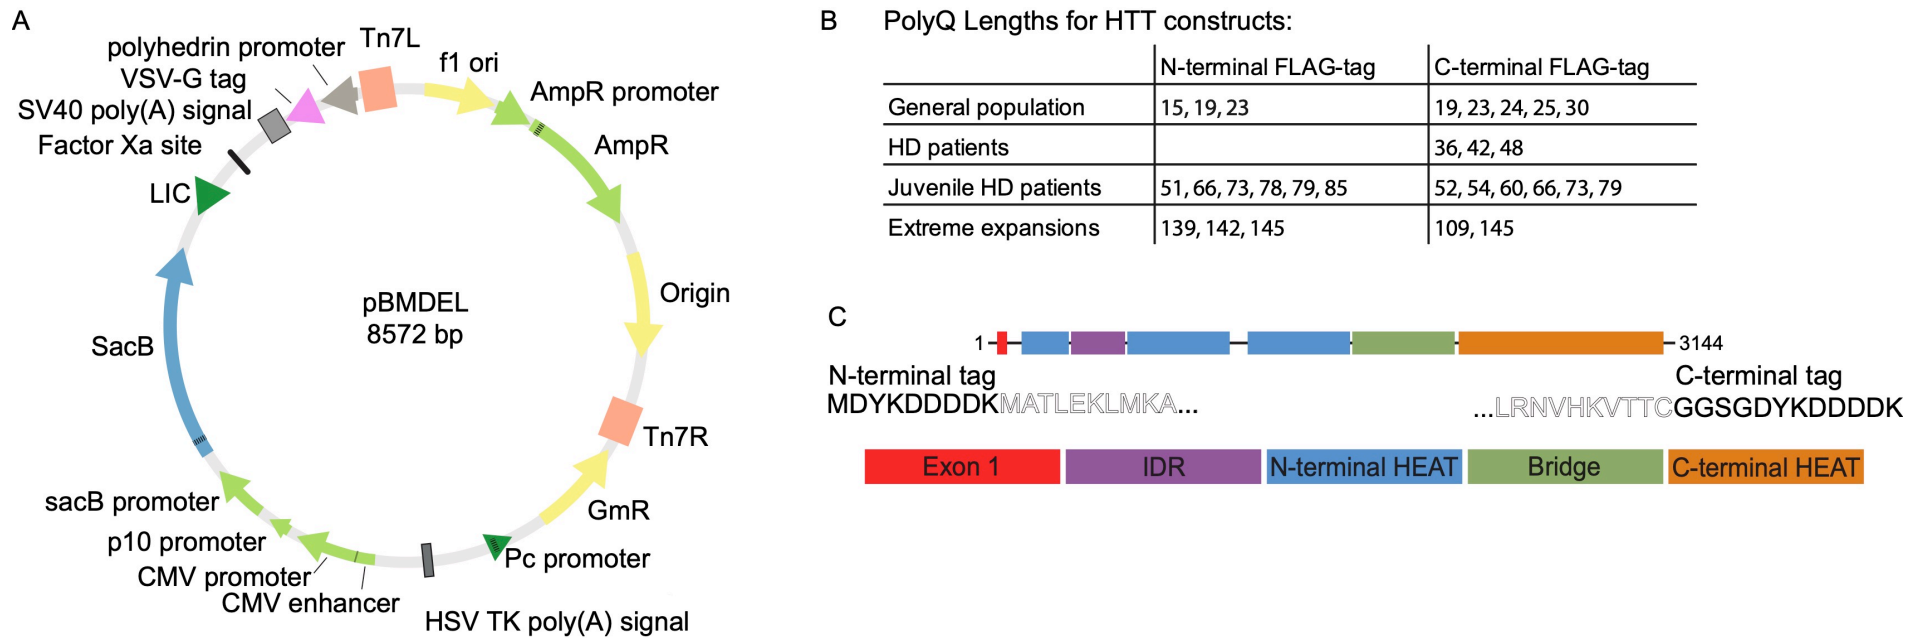

**Figure 1.** A) pBMDEL vector map B) 28 HTT expression constructs with different polyQ lengths were generated with either N or C terminal FLAG-tags, C) FLAG-tags are appended to either end of the full-length HTT expression construct (comprising exon1, the N-terminal HEAT domains, the intrinsically disordered region (IDR), the Bridge domain and the C-terminal HEAT domain) with minimal additional sequence.

## 1 **Versatile expression of HTT variants in insect cells or mammalian cells**

2 The HTT pBMDEL expression constructs we have developed allow the expression of HTT protein by three  
3 different methods; baculovirus-mediated expression in insect cells, transient transfection in mammalian cells or  
4 transduction in mammalian cells (**Figure 2**). All three methods allow cell growth in suspension culture permitting  
5 facile scaling of the culture volumes and thus scaling of the protein production as needed. Irrespective of the  
6 expression system, HTT protein could be purified in a two-step protocol as previously described (Seong et al.,  
7 2010) from cell lysates in a Tris-salt buffer system comprising first a FLAG pull-down step and followed by size-  
8 exclusion chromatography using a Superose6 resin column (**Figure 2a**). Similar to the HTT purification efforts of  
9 other research groups, multiple peaks are present in the size-exclusion chromatography profile, likely indicating  
10 the presence of a range of different oligomeric and/or aggregated states.

11  
12 Yields of the wildtype (Q23) purified HTT protein samples by the three expression methods can be as high as  
13 ~1.6 mg/L production in Sf9 insect cell culture, to ~1 mg/L in transduced EXPI293F mammalian cells and ~0.4  
14 mg/L in transiently transfected EXPI293F mammalian cells when measured after FLAG pull-down. Comparisons  
15 of preparations of HTT Q23 samples with either N- or C-terminal FLAG tag did not show significant difference in  
16 yield. On the other hand, comparison of the yields of purified HTT with different polyQ expansions showed a trend  
17 of decreasing yield with increasing polyQ length. For example, in insect cells HTT Q42 yielded ~0.5 mg/L whereas  
18 Q145 gives yields of <0.1 mg/L. Longer polyQ lengths were also generally found to be more variable in yield  
19 between productions. For all constructs in each expression system, the 2-step purification protocol yielded a  
20 protein sample which is >90 % pure by Coomassie stained SDS-PAGE analysis (**Figure 2b**). Samples were  
21 analysed by Western blot using anti-HTT antibodies which revealed a discrete band of the expected molecular  
22 weight for each sample (**Supplementary Figure S1**).

23  
24 Purification of the HTT-HAP40 complex, previously reported from an adherent mammalian cell expression system  
25 (Guo et al., 2018), could be achieved through a 3:1 viral titre ratio of HTT<sup>1-3144</sup> Q23 in a C-terminally FLAG-tagged  
26 pBMDEL expression construct and HAP40<sup>1-371</sup> in an N-terminally His6-tagged pFBOH-MHL insect cell expression  
27 vector (**Figure 2c**). The purification protocol was modified so that an additional Ni-affinity chromatography step  
28 was included following the FLAG pull-down. The final size-exclusion chromatography step reveals that the HTT-  
29 HAP40 complex is a monodisperse sample, indicating increased protein stability and conformational homogeneity  
30 in comparison to apo HTT. Formation of this complex by HTT produced in insect cells indicates that the protein  
31 expressed is correctly folded and functional with respect to formation of an important protein interaction.

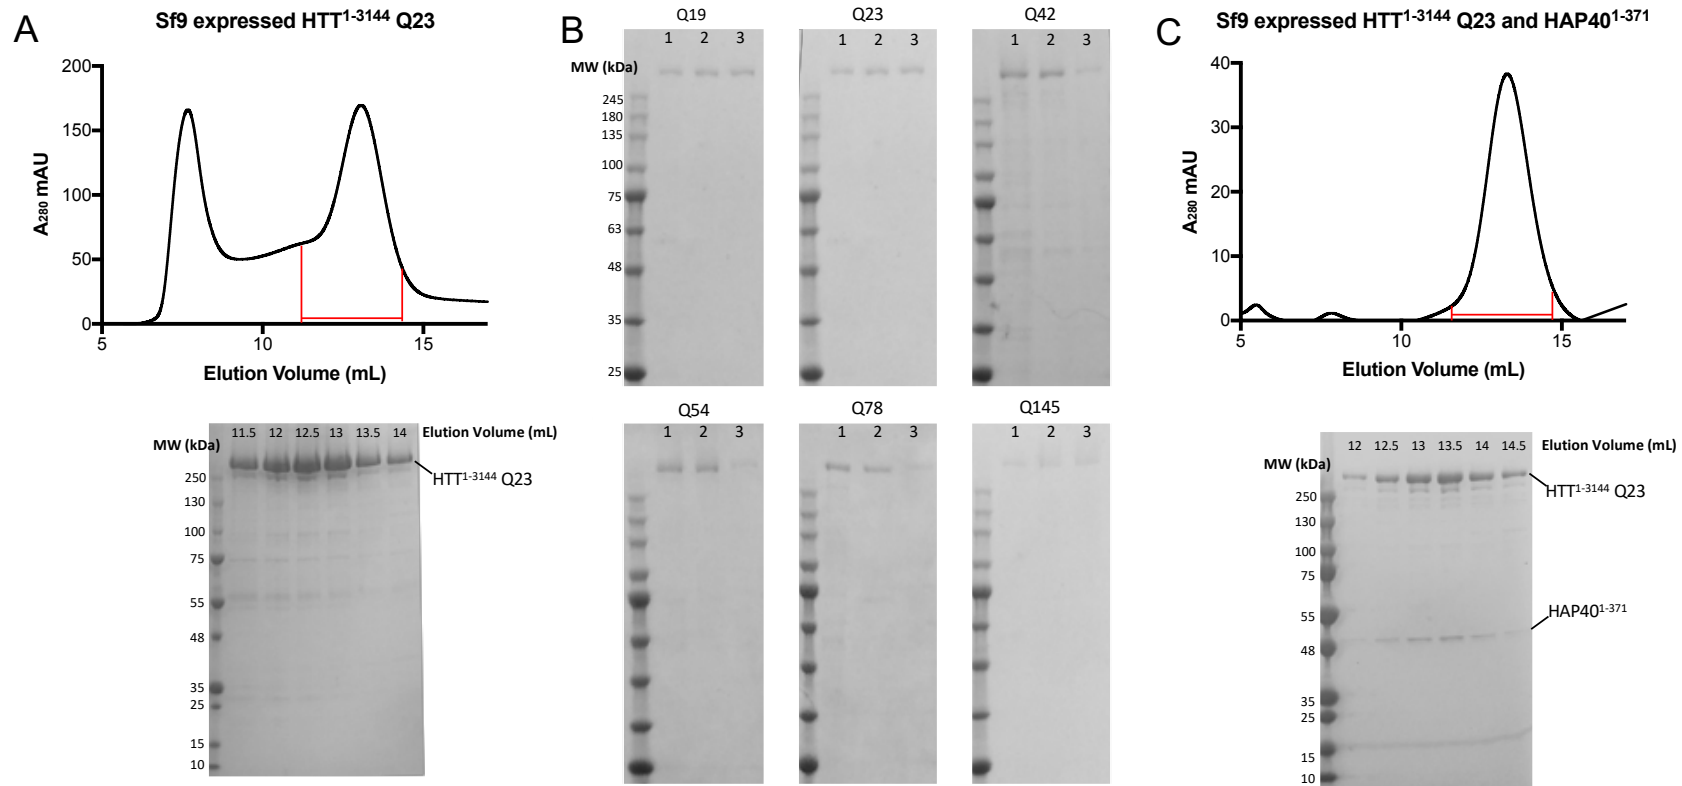

**Figure 2.** A) Superose6 10/300 GL column size-exclusion chromatography profile of HTT<sup>1-3144</sup> Q23 expressed in Sf9 cells and purified using the C-terminal FLAG-tag. Coomassie-stained 4-20 % SDS-PAGE analysis of size-exclusion chromatography fractions (0.5 mL volume) spanning 11.5-14 mL as marked on the elution profile. B) Coomassie-stained 4-20 % SDS-PAGE analysis of C-terminally FLAG-tagged samples of HTT of different polyQ lengths from lane 1 – baculovirus-mediated expression in Sf9 insect cells, lane 2 - transient transfection in mammalian EXPI293F cells or lane 3 - transduction in mammalian EXPI293F cells. C) Superose6 10/300 GL column size-exclusion chromatography profile of HTT<sup>1-3144</sup> Q23 coexpressed with HAP40<sup>1-371</sup> in Sf9 cells and purified using the HTT construct C-terminal FLAG-tag and HAP40 N-terminal his-tag. Coomassie-stained 4-20 % SDS-PAGE analysis of size-exclusion chromatography fractions (0.5 mL volume) spanning 12-14.5 mL as marked on the elution profile.

## 1 **HTT expressed in Sf9 insect cells retains reported phosphorylation PTMs**

2 PTM of HTT is well described for protein derived from various mammalian cell systems and in some detail for  
3 HTT extracted from post-mortem brain tissue (Hornbeck et al., 2015; Ratovitski et al., 2017; Saudou and Humbert,  
4 2016). However, it is not known if these PTMs are conserved in HTT expressed in Sf9 insect cells. Purified HTT  
5 Q23 and Q54 from Sf9 and EXPI293F were subjected to bottom-up proteomics (Jünger and Aebersold, 2014;  
6 Trevisiol et al., 2016). PTMs were mapped for HTT expressed in Sf9 and EXPI293F cells and compared with  
7 published PTMs of mammalian derived HTT (**Tables 1 and 2** detail results for HTT Q23 samples from Sf9 and  
8 EXPI293F production, complete data can be found on PRIDE (accession PXD010865) and in Zenodo).

9  
10 To map the PTMs on HTT Q23 produced in Sf9 cells as completely as possible, this sample was digested with  
11 five proteases having complementary and non-specific cleavage specificity; trypsin, lysargiNase (Huesgen et al.,  
12 2015), pepsin, wild type  $\alpha$ -lytic protease (WaLP) and M190A  $\alpha$ -lytic protease (MaLP) (Meyer et al., 2014). Trypsin  
13 and lysargiNase cleave at the C- and N-terminal, respectively, of lysine (K) and arginine (R) residues thus yielding  
14 complementary (or mirror-image) peptides. WaLP and MaLP preferentially cleave at aliphatic amino acids, while  
15 pepsin at pH > 2 cleaves at Phe, Tyr, Trp and Leu in position P1 or P1' (Keil, 1992). MaLP, WaLP, and pepsin  
16 were selected to probe the K- and R-poor regions of the protein. Digestion of the other HTT samples was  
17 performed with trypsin alone.

18  
19 When LC/MS data from the five proteolysis reactions of Q23 HTT from Sf9 are searched together, at least 90%  
20 sequence coverage was observed, while trypsin digestion of the other HTT samples yielded at least 50%  
21 sequence coverage (**Supplementary Figures S2 and S3**). As we were able to digest such large overall amounts  
22 (hundreds of micrograms) of HTT protein in multiple rounds of MS experiments, due to the high levels of  
23 production from our expression systems, this also increased the overall peptide coverage and allowed us to map  
24 PTMs with lower incidence in the samples. As expected for the high purity HTT samples, HTT sequence peptides  
25 were the highest abundance proteins detected although some contaminating proteins were detected. Details of  
26 these contaminants for the HTT Q23 samples from EXPI293F cells (**Supplementary Table S1**) show that most of  
27 these proteins are unlikely to be true HTT interactors as they have high CRAPome scores (Mellacheruvu et al.,  
28 2013) or are very low abundance. Modifications were detected for all samples, with well-described  
29 phosphorylation motifs being present in HTT samples from both Sf9 and EXPI293F production methods (**Figure**  
30 **3**).

31  
32 By employing multiple enzymes, sequences in regions containing sparse K and R residues, for example, a 20-  
33 amino acid long peptide within exon 1 (**Supplementary Figure S4**) were detected. Peptide-spectrum matches  
34 (PSMs) were used to prioritize the confident phosphorylation sites. HTT expressed in Sf9 cells retains many of the  
35 highly observed phosphorylation sites described in the literature for mammalian cell lines and post-mortem tissue  
36 see (**Table 1** and **Supplementary Figures S5 and S6**). A total of 22 phosphorylation events with at least 3  
37 peptide spectra matches (PSMs) were mapped in Sf9-expressed Q23 HTT, 11 of which have been reported in at



1 least one instance in the literature. Mapping the remaining modifications to the cryoEM HTT-HAP40 model shows  
2 that most would be surface-exposed residues in the context of apo HTT (**Supplementary Figure S7**) and their  
3 respective physiological likelihood and probably kinase, as determined by NetPhos analysis (Blom et al., 1999), is  
4 detailed in **Table 1**. Monomethylation of some lysine and arginine residues was also detected. Sequence analysis  
5 of HTT using CIDER (Holehouse et al., 2017) and IUPred (Dosztányi et al., 2005a) in conjunction with analysis of  
6 the recently published near-atomic resolution cryo-electron microscopy structure of HTT in complex with HAP40  
7 (Guo et al., 2018) (**Figure 4**), reveals that most of the phosphorylation sites are within disordered regions of the  
8 protein structure as described previously (Ratovitski et al., 2017). Whilst some of these previously unreported  
9 modifications may be artefacts of the Sf9 expression system, they appear to have minimal effect on global  
10 huntingtin function, as seen by the ability of this sample to form a complex with HAP40.

11  
12 A total of 25 phosphorylation motifs with at least 3 PSMs were mapped for HTT Q23 expressed in EXPI293F  
13 cells, 19 of which have been described previously in the literature (**Table 2** and **Supplementary Figure S5**).  
14 Interestingly, we also observed acetylation (K826 and K2932), monomethylation (R2781 and H2786) and  
15 dimethylation (R2053) of our samples, none of which have been previously described in the literature. Acetylation  
16 of HTT at other sites has been previously described and methylation motifs are observed in MS data of post-  
17 mortem human brain tissue samples of HTT (Ratovitski et al., 2017), indicating that HTT protein methylation is a  
18 physiological modification.

PHOSPHORYLATION SITES

| Site          | # PSMs* | Reports or Predictions                                                                                                                                                                                                                                                                                                                                                                                                                                                                                                                                                                                                       | HD Patient/control tissue samples? | <i>In vitro</i> or animal models? |
|---------------|---------|------------------------------------------------------------------------------------------------------------------------------------------------------------------------------------------------------------------------------------------------------------------------------------------------------------------------------------------------------------------------------------------------------------------------------------------------------------------------------------------------------------------------------------------------------------------------------------------------------------------------------|------------------------------------|-----------------------------------|
| S421          | 9 (9)   | Reported (Beausoleil et al., 2006; Britton et al., 2014; Carrier et al., 2016; Christensen et al., 2010; Colin et al., 2008; Gauci et al., 2009; Han et al., 2010; Hsu et al., 2011; Huang et al., 2015; Humbert et al., 2002; Klammer et al., 2012; Marion et al., 2014; Mertins et al., 2014, 2016; Moritz et al., 2010; Naia et al., 2015; Pan et al., 2009; Pardo et al., 2006; Rangone et al., 2004; Ratovitski et al., 2017; Schilling et al., 2006; Schweppe et al., 2013; Sharma et al., 2014; Warby et al., 2005; Watkin et al., 2014; Weber et al., 2012; Yi et al., 2014; Zahedi et al., 2008; Zala et al., 2008) | Yes                                | Yes                               |
| S421 and S434 | 10 (10) | Both reported                                                                                                                                                                                                                                                                                                                                                                                                                                                                                                                                                                                                                | Yes/No                             | Yes / Yes                         |
| S432          | 3 (7)   | Reported (Dong et al., 2012; Huang et al., 2015; Ratovitski et al., 2017; Schweppe et al., 2013; Xiao et al., 2010)                                                                                                                                                                                                                                                                                                                                                                                                                                                                                                          | No                                 | Yes                               |
| S434          | 3 (5)   | Reported (Beausoleil et al., 2006; Beli et al., 2012; Bian et al., 2014; Boeing et al., 2016; Britton et al., 2014; Carrier et al., 2016; Christensen et al., 2010; Dephoure et al., 2008; Gauci et al., 2009; Hsu et al., 2011; Huang et al., 2015; Klammer et al., 2012; Luo et al., 2005; Mayya et al., 2009; Mertins et al., 2013, 2016; Ratovitski et al., 2017; Schweppe et al., 2013; Sharma et al., 2014; Stuart et al., 2015; Watkin et al., 2014; Weber et al., 2012; Xiao et al., 2010; Yi et al., 2014; Zahedi et al., 2008)                                                                                     | No                                 | Yes                               |
| S622          | 3 (3)   | Reported (Kettenbach et al., 2011)                                                                                                                                                                                                                                                                                                                                                                                                                                                                                                                                                                                           | No                                 | Yes                               |
| S780          | 3 (4)   | Predicted NetPhos 3.1 (CDK1 – 0.514)                                                                                                                                                                                                                                                                                                                                                                                                                                                                                                                                                                                         | No                                 | No                                |
| T816          | 3 (3)   | Predicted NetPhos 3.1 (unspecified – 0.957)                                                                                                                                                                                                                                                                                                                                                                                                                                                                                                                                                                                  | No                                 | No                                |
| S1181         | 3 (5)   | Reported (Anne et al., 2007; Daub et al., 2008; Hsu et al., 2011; Huang et al., 2015; Kettenbach et al., 2011; Ratovitski et al., 2017; Schilling et al., 2006; Sharma et al., 2014; Stuart et al., 2015)                                                                                                                                                                                                                                                                                                                                                                                                                    | Yes                                | Yes                               |
| S1201         | 27 (37) | Reported (Anne et al., 2007; Beli et al., 2012; Boeing et al., 2016; Brill et al., 2009; Daub et al., 2008; Gauci et al., 2009; Huang et al., 2015; Kettenbach et al., 2011; Klammer et al., 2012; Luerman et al., 2014; Mertins et al., 2013, 2014, 2016; Pan et al., 2009; Ratovitski et al., 2017; Rigbolt et al., 2011; Schilling et al., 2006; Schreiber et al., 2010; Schweppe et al., 2013; Sharma et al., 2014; Stuart et al., 2015; Yi et al., 2014; Zhou et al., 2013)                                                                                                                                             | No                                 | Yes                               |
| S1469         | 6 (6)   | Predicted NetPhos 3.1 (CDK1 – 0.513)                                                                                                                                                                                                                                                                                                                                                                                                                                                                                                                                                                                         | No                                 | No                                |
| T1557         | 4 (6)   | Predicted NetPhos 3.1 (unspecified – 0.777)                                                                                                                                                                                                                                                                                                                                                                                                                                                                                                                                                                                  | No                                 | No                                |
| S1864         | 4 (4)   | Reported (Franz-Wachtel et al., 2012; Huang et al., 2015; Mertins et al., 2014; Ratovitski et al., 2017)                                                                                                                                                                                                                                                                                                                                                                                                                                                                                                                     | Yes                                | Yes                               |
| S1866         | 5 (8)   | Reported (Huang et al., 2015; Mertins et al., 2014, 2016; Ratovitski et al., 2017)                                                                                                                                                                                                                                                                                                                                                                                                                                                                                                                                           | No                                 | Yes                               |
| S1867         | 3 (5)   | Predicted NetPhos 3.1 (unsp - 0.975)                                                                                                                                                                                                                                                                                                                                                                                                                                                                                                                                                                                         | No                                 | No                                |
| S1876         | 4 (4)   | Reported (Beli et al., 2012; Bian et al., 2014; Boeing et al., 2016; Dephoure et al., 2008; Franz-Wachtel et al., 2012; Gauci et al., 2009; Han et al., 2010; Huang et al., 2015; Kettenbach et al., 2011; Klammer et al., 2012; Luerman et al., 2014; Mayya et al., 2009; Mertins et al., 2013, 2014, 2016; Olsen et al., 2010; Rajmakers et al., 2010; Ratovitski et al., 2017; Rigbolt et al., 2011; Rolland et al., 2014; Schreiber et al., 2010; Schweppe et al., 2013; Sharma et al., 2014; Stuart et al., 2015; Wang et al., 2014; Xia et al., 2008; Yi et al., 2014; Zhou et al., 2013)                              | Yes                                | Yes                               |
| Y2102         | 3 (3)   | Predicted NetPhos 3.1 (unspecified – 0.921)                                                                                                                                                                                                                                                                                                                                                                                                                                                                                                                                                                                  | No                                 | No                                |
| S2550         | 3 (3)   | Reported (Huang et al., 2015)                                                                                                                                                                                                                                                                                                                                                                                                                                                                                                                                                                                                | No                                 | Yes                               |
| S2775         | 3 (4)   | Predicted NetPhos 3.1 (PKC – 0.491)                                                                                                                                                                                                                                                                                                                                                                                                                                                                                                                                                                                          | No                                 | No                                |
| S2776         | 7 (8)   | Predicted NetPhos 3.1 (unspecified – 0.989)                                                                                                                                                                                                                                                                                                                                                                                                                                                                                                                                                                                  | No                                 | No                                |
| T2800         | 10 (13) | Predicted NetPhos 3.1 (CaM-II – 0.456)                                                                                                                                                                                                                                                                                                                                                                                                                                                                                                                                                                                       | No                                 | No                                |
| S2913         | 7 (10)  | Predicted NetPhos 3.1 (unspecified - 0.990)                                                                                                                                                                                                                                                                                                                                                                                                                                                                                                                                                                                  | No                                 | No                                |
| T3133         | 10 (12) | Predicted NetPhos 3.1 (PKC - 0.813)                                                                                                                                                                                                                                                                                                                                                                                                                                                                                                                                                                                          | No                                 | No                                |

LYSINE AND ARGININE MONOMETHYLATION SITES

| Site  | # PSMs* | Site  | # PSMs* | Site  | # PSMs* |
|-------|---------|-------|---------|-------|---------|
| R221  | 4 (4)   | R1461 | 3 (5)   | K2802 | 5 (5)   |
| K700  | 3 (5)   | R1555 | 4 (4)   | R2908 | 4 (6)   |
| R908  | 7 (9)   | R1947 | 3 (5)   | R3112 | 3 (4)   |
| K1264 | 6 (6)   | K2163 | 3 (5)   | R3130 | 10 (10) |
| K1448 | 3 (4)   | R2774 | 7 (15)  |       |         |

**Table 1.** List of post-translational modifications identified for Sf9 expressed Q23 HTT in reference to literature. Modifications which have been discovered in proteomics studies, but not published were retrieved from PhosphoSitePlus (Hornbeck et al., 2015). Some modifications have not been described before. To illustrate the likelihood of these being physiologically relevant modifications, NetPhos 3.1 predictions for the putative enzyme and likelihood score are included (Blom et al., 1999). Only modifications with at least 3 peptide spectrum matches for at least one peptide containing the modification are listed in the table. All data are available via PRIDE (accession PXD010865) with summaries in Zenodo.

\*PSMs are reported as the number of peptide spectrum matches for the most abundant peptide containing the modification described with the total number of peptide spectra for all peptides containing this modification motif in brackets. Methylation of huntingtin has not been previously described or reported.

PHOSPHORYLATION SITES

| Site            | # PSMs* | Previously reported                                                                                                                                                                                                                                                                                                                                                                                                                                                                                                                                                                                                          | HD Patient/control tissue samples | In vitro human cell models |
|-----------------|---------|------------------------------------------------------------------------------------------------------------------------------------------------------------------------------------------------------------------------------------------------------------------------------------------------------------------------------------------------------------------------------------------------------------------------------------------------------------------------------------------------------------------------------------------------------------------------------------------------------------------------------|-----------------------------------|----------------------------|
| Y173            | 1 (1)   | Predicted NetPhos 3.1 (unspecified - 0.587)                                                                                                                                                                                                                                                                                                                                                                                                                                                                                                                                                                                  | No                                | No                         |
| S419            | 1 (1)   | Reported (Han et al., 2010; Huang et al., 2015; Moritz et al., 2010; Ratovitski et al., 2017; Schweppe et al., 2013)                                                                                                                                                                                                                                                                                                                                                                                                                                                                                                         | No                                | Yes                        |
| S421            | 3 (3)   | Reported (Beausoleil et al., 2006; Britton et al., 2014; Carrier et al., 2016; Christensen et al., 2010; Colin et al., 2008; Gauci et al., 2009; Han et al., 2010; Hsu et al., 2011; Huang et al., 2015; Humbert et al., 2002; Klammer et al., 2012; Marion et al., 2014; Mertins et al., 2014, 2016; Moritz et al., 2010; Naia et al., 2015; Pan et al., 2009; Pardo et al., 2006; Rangone et al., 2004; Ratovitski et al., 2017; Schilling et al., 2006; Schweppe et al., 2013; Sharma et al., 2014; Warby et al., 2005; Watkin et al., 2014; Weber et al., 2012; Yi et al., 2014; Zahedi et al., 2008; Zala et al., 2008) | Yes                               | Yes                        |
| S421 and S431   | 1 (1)   | Both reported                                                                                                                                                                                                                                                                                                                                                                                                                                                                                                                                                                                                                | Yes/No                            | Yes                        |
| S421 and S434   | 5 (5)   | Both reported                                                                                                                                                                                                                                                                                                                                                                                                                                                                                                                                                                                                                | Yes/No                            | Yes                        |
| S431            | 1 (1)   | Reported (Carrier et al., 2016; Dong et al., 2012; Huang et al., 2015; Imami et al., 2012; Mertins et al., 2014; Ratovitski et al., 2017; Schweppe et al., 2013; Watkin et al., 2014)                                                                                                                                                                                                                                                                                                                                                                                                                                        | No                                | Yes                        |
| S432            | 2 (4)   | Reported (Dong et al., 2012; Huang et al., 2015; Ratovitski et al., 2017; Schweppe et al., 2013; Xiao et al., 2010)                                                                                                                                                                                                                                                                                                                                                                                                                                                                                                          | No                                | Yes                        |
| S434            | 5 (7)   | Reported (Beausoleil et al., 2006; Beli et al., 2012; Bian et al., 2014; Boeing et al., 2016; Britton et al., 2014; Carrier et al., 2016; Christensen et al., 2010; Dephoure et al., 2008; Gauci et al., 2009; Hsu et al., 2011; Huang et al., 2015; Klammer et al., 2012; Luo et al., 2005; Mayya et al., 2009; Mertins et al., 2013, 2016; Ratovitski et al., 2017; Schweppe et al., 2013; Sharma et al., 2014; Stuart et al., 2015; Watkin et al., 2014; Weber et al., 2012; Xiao et al., 2010; Yi et al., 2014; Zahedi et al., 2008)                                                                                     | No                                | Yes                        |
| S622            | 1 (1)   | Reported (Kettenbach et al., 2011)                                                                                                                                                                                                                                                                                                                                                                                                                                                                                                                                                                                           | No                                | Yes                        |
| S623            | 3 (4)   | Reported (Humphrey et al., 2013)                                                                                                                                                                                                                                                                                                                                                                                                                                                                                                                                                                                             | No                                | Yes                        |
| S1063           | 1 (1)   | Predicted NetPhos 3.1 (unspecified - 0.989)                                                                                                                                                                                                                                                                                                                                                                                                                                                                                                                                                                                  | No                                | No                         |
| S1106           | 8 (8)   | Reported Zhou (2011) PhosphoSitePlus dataset                                                                                                                                                                                                                                                                                                                                                                                                                                                                                                                                                                                 | No                                | Yes                        |
| S1181           | 6 (8)   | Reported (Anne et al., 2007; Daub et al., 2008; Hsu et al., 2011; Huang et al., 2015; Kettenbach et al., 2011; Ratovitski et al., 2017; Schilling et al., 2006; Sharma et al., 2014; Stuart et al., 2015)                                                                                                                                                                                                                                                                                                                                                                                                                    | Yes                               | Yes                        |
| S1197           | 2 (2)   | Reported (Boeing et al., 2016; Huang et al., 2015)                                                                                                                                                                                                                                                                                                                                                                                                                                                                                                                                                                           | No                                | Yes                        |
| S1201           | 12 (38) | Reported (Anne et al., 2007; Beli et al., 2012; Boeing et al., 2016; Brill et al., 2009; Daub et al., 2008; Gauci et al., 2009; Huang et al., 2015; Kettenbach et al., 2011; Klammer et al., 2012; Luerman et al., 2014; Mertins et al., 2013, 2014, 2016; Pan et al., 2009; Ratovitski et al., 2017; Rigbolt et al., 2011; Schilling et al., 2006; Schreiber et al., 2010; Schweppe et al., 2013; Sharma et al., 2014; Stuart et al., 2015; Yi et al., 2014; Zhou et al., 2013)                                                                                                                                             | No                                | Yes                        |
| T1262           | 1 (1)   | Predicted NetPhos 3.1 (CDK1 - 0.495)                                                                                                                                                                                                                                                                                                                                                                                                                                                                                                                                                                                         | No                                | No                         |
| T1411           | 1 (1)   | Reported Guo (2007) PhosphoSitePlus dataset                                                                                                                                                                                                                                                                                                                                                                                                                                                                                                                                                                                  | No                                | Yes                        |
| T1859           | 1 (1)   | Reported (Wiśniewski et al., 2010)                                                                                                                                                                                                                                                                                                                                                                                                                                                                                                                                                                                           | No                                | Yes                        |
| S1864           | 4 (5)   | Reported (Franz-Wachtel et al., 2012; Huang et al., 2015; Mertins et al., 2014; Ratovitski et al., 2017)                                                                                                                                                                                                                                                                                                                                                                                                                                                                                                                     | Yes                               | Yes                        |
| S1866           | 3 (5)   | Reported (Huang et al., 2015; Mertins et al., 2014, 2016; Ratovitski et al., 2017)                                                                                                                                                                                                                                                                                                                                                                                                                                                                                                                                           | No                                | Yes                        |
| T1868           | 1 (1)   | Reported (Huang et al., 2015)                                                                                                                                                                                                                                                                                                                                                                                                                                                                                                                                                                                                | No                                | Yes                        |
| S2550           | 1 (1)   | Reported (Huang et al., 2015)                                                                                                                                                                                                                                                                                                                                                                                                                                                                                                                                                                                                | No                                | Yes                        |
| S2690           | 2 (2)   | Predicted NetPhos 3.1 (unspecified - 0.994)                                                                                                                                                                                                                                                                                                                                                                                                                                                                                                                                                                                  | No                                | No                         |
| T2748           | 1 (1)   | Predicted NetPhos 3.1 (PKC - 0.529)                                                                                                                                                                                                                                                                                                                                                                                                                                                                                                                                                                                          | No                                | No                         |
| T3098 and Y3101 | 1 (1)   | Predicted NetPhos 3.1 (GSK3 - 0.446) / Predicted NetPhos 3.1 (EGFR - 0.449)                                                                                                                                                                                                                                                                                                                                                                                                                                                                                                                                                  | No                                | No                         |

OTHER MODIFICATION SITES

| Site  | # PSMs* | Modification       |
|-------|---------|--------------------|
| K826  | 1 (1)   | Acetylation (K)    |
| R2053 | 1 (1)   | Dimethylation (KR) |
| R2781 | 4 (4)   | Methylation (KR)   |
| H2786 | 6 (14)  | Methylation (H)    |
| K2932 | 1 (1)   | Acetylation (K)    |

**Table 2.** List of post-translational modifications identified for EXP1293F expressed Q23 HTT in reference to literature. Modifications which have been discovered in proteomics studies, but not published were retrieved from PhosphoSitePlus (Hornbeck et al., 2015). Some modifications have not been described before. To illustrate the likelihood of these being physiologically relevant modifications, NetPhos 3.1 predictions for the putative enzyme and likelihood score are included (Blom et al., 1999). All data are available via PRIDE (accession PXD010865) with summaries in Zenodo.

\*PSMs are reported as the number of peptide spectrum matches for the most abundant peptide containing the modification described with the total number of peptide spectra for all peptides containing this modification motif in brackets. Methylation of huntingtin has not been previously described or reported.

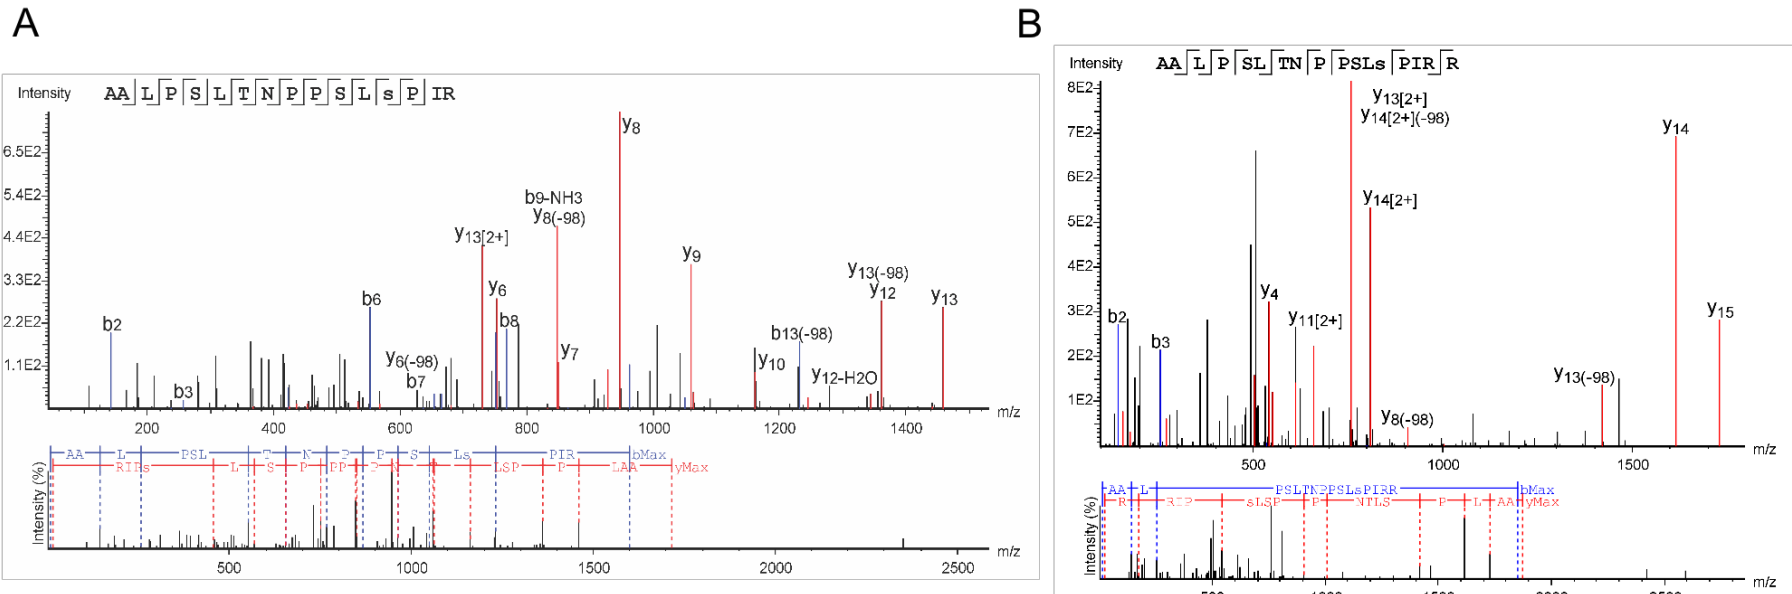

**Figure 3.** Spectra of S1181 phosphorylation motifs detected from samples of HTT<sup>1-3144</sup> Q23 derived from A) Sf9 and B) EXPI293F production. This modification has been detected in human brain samples, indicating that many of the detected phosphorylation motifs detected in the purified HTT samples are physiologically relevant.

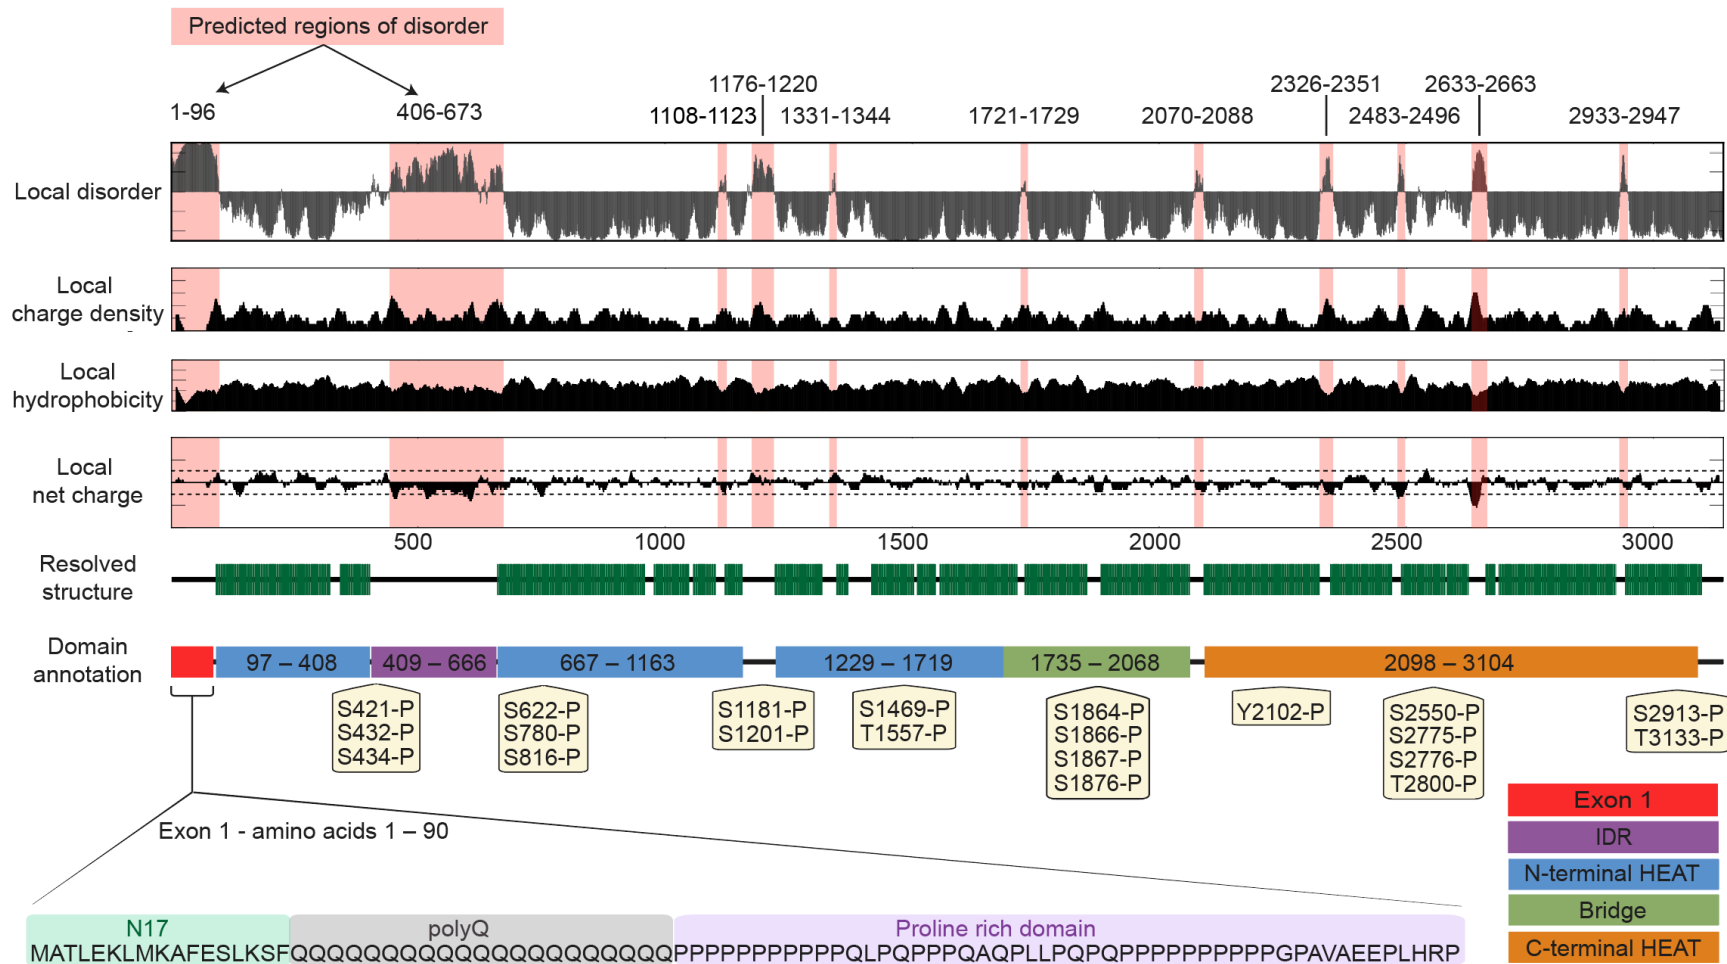

**Figure 4.** Sequence analysis of HTT complemented by structural data reveals a large modular protein connected by flexible unstructured linkers with numerous short unstructured loops protruding from the ordered domains. Local disorder, charge density, hydrophobicity and net charge are based on sequence analysis, while resolved structure and domain annotation from cryo-electron microscopy (Guo et al., 2018). Of particular note, both exon1 and the intrinsically disordered region (IDR) are not resolved in the current cryoEM model. Phosphorylation motifs of insect-cell derived HTT Q23 mapped by peptide mass spectrometry and found in at least three peptide spectrum matches are annotated.

## 1 **Analysis of HTT protein properties by biophysical methods**

2 Size-exclusion chromatography of HTT protein derived from insect Sf9 or mammalian EXPI293F cells using a  
3 Superose6 10/300 GL column gives a characteristic elution profile (**Figure 2a**), with a void-aggregate peak  
4 followed by peaks previously attributed as being dimer and monomer species of HTT based on column standards  
5 (Huang et al., 2015; Li et al., 2006; Seong et al., 2010). The recent cryo-electron microscopy structure of HTT in  
6 complex with HAP40 reveals a bi-lobed structure of HTT in which the N-HEAT and C-HEAT domains wrap around  
7 HAP40 yielding a more compact and globular structure (Guo et al., 2018). Furthermore, HAP40 was described as  
8 being critical for producing a conformationally homogenous HTT sample amenable to cryo-electron microscopy  
9 structure determination. Our purified samples of apo HTT therefore lack a binding partner such as HAP40 which  
10 may account for the broad and overlapping elution peaks observed in gel filtration analyses as well as the  
11 tendency for self-association when HTT samples are analysed at higher protein concentrations.

12  
13 To further understand this tendency for self-association and sample heterogeneity, a C-terminal FLAG-tagged  
14 HTT Q23 sample taken from the “monomer” peak of the Superose6 elution profile, was analysed by SEC-MALS  
15 using the same specification Superose6 column, which allows calculation of the in-solution protein mass. This  
16 analysis revealed a peak with a shoulder with approximate mass calculations indicating that this sample is a  
17 mixture of both HTT monomer and dimer (**Figure 5A**). In contrast, the HTT-HAP40 complex sample run on the  
18 same SEC-MALS set up at the same total protein concentration is monodisperse and the mass calculated across  
19 the peak is stable indicating the sample is homogenous and not self-associating (**Figure 5B**). Long-term storage  
20 and freeze-thaw of HTT-HAP40 samples had minimal effect on the peak profile whilst apo HTT samples had a  
21 tendency to redistribute from monomer peak to a peak profile similar to that observed during purification. Taken  
22 together, these results suggest HAP40 binding reduces homotypic HTT interaction, possibly by competing for an  
23 interaction interface or through a linkage effect (Posey et al., 2018).

24  
25 C-terminal FLAG-tagged HTT samples of different polyQ lengths, purified from Sf9 cells, were analysed by DSLS  
26 over a temperature gradient from 25-85 °C to assess thermal stability and propensity to aggregate under  
27 increasing temperatures. Irrespective of polyQ-length, the HTT samples were stable up to ~55 °C with a transition  
28 to higher molecular weight aggregates was observed over the course of ~20 °C from 55-75 °C (**Figure 5C**).  
29 Temperature of aggregation ( $T_{agg}$ ) values (Senisterra et al., 2006) for each HTT sample are all similar at ~60-  
30 63°C (**Figure 5C**). HTT-HAP40 complexes with wildtype (Q23) and polyQ expanded (Q54) were also analysed by  
31 DSLS yielding similar thermal aggregation profiles (~57-60 °C). This data indicated that the thermal aggregation  
32 properties of HTT protein are not polyQ-dependent in either the apo or HAP40-bound forms of HTT. The relatively  
33 slow transition of all protein samples upon heating suggests that the light scattering signal from protein  
34 aggregation is dominated by that of the large solenoid HEAT repeat proteins, and any stabilisation of the protein  
35 by HAP40 or perturbation through polyQ expansion is not revealed by this methodology.

36

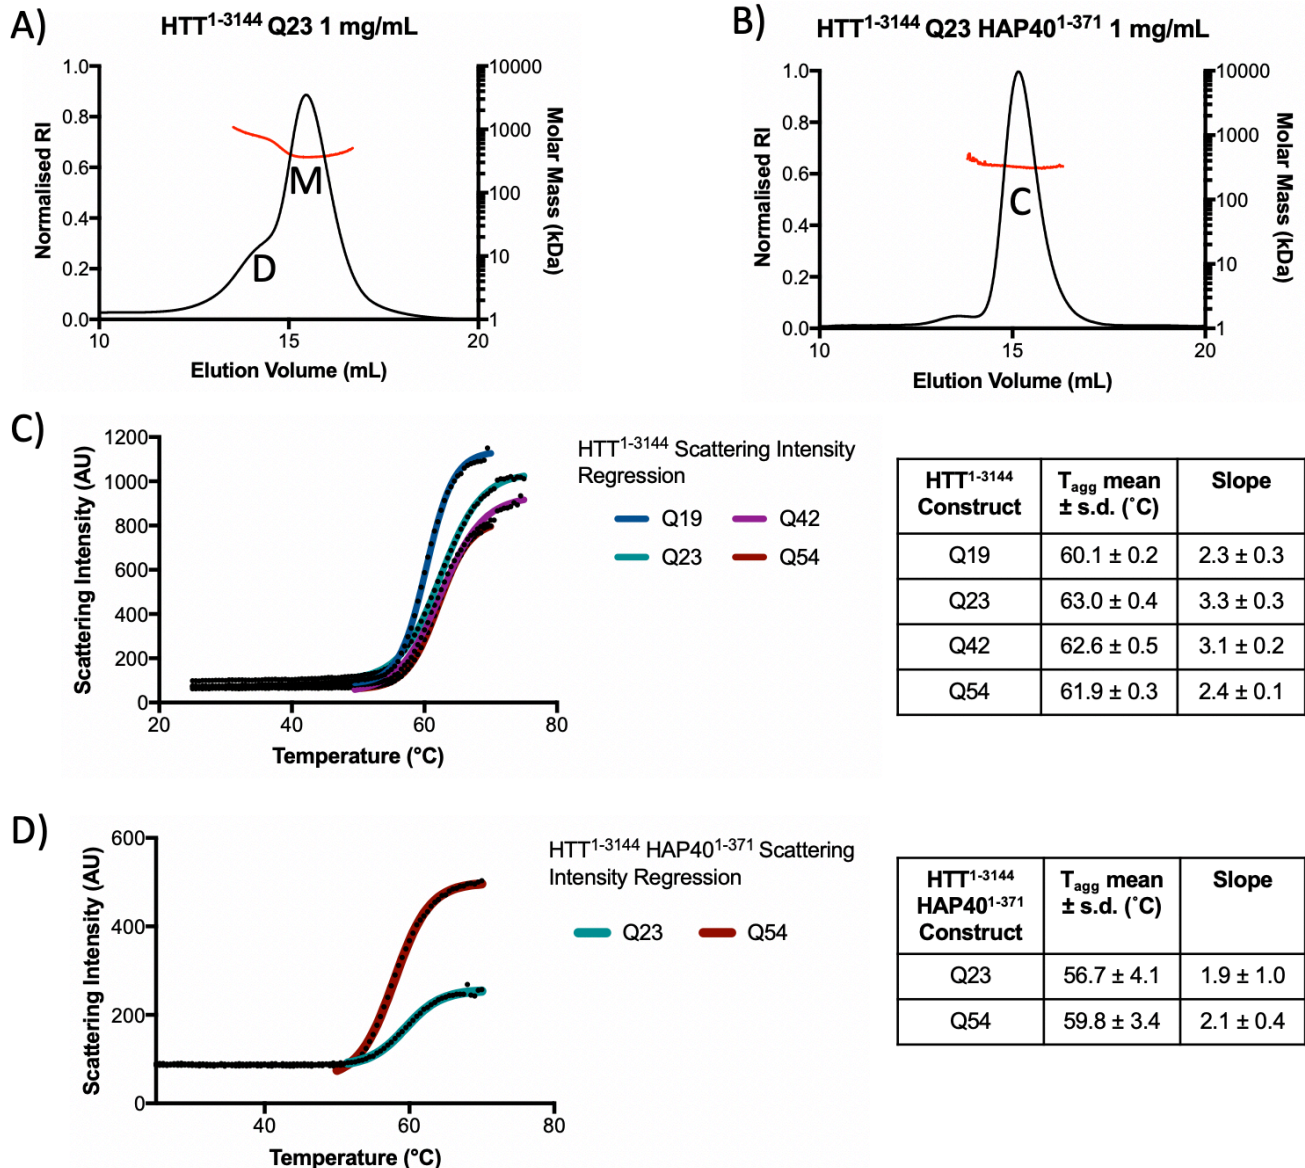

**Figure 5.** A) Analytical Superose6 10/300 GL gel filtration in tandem with multi-angle light scattering (SEC-MALS) profiles of  $HTT^{1-3144}$  Q23 showing distinct dimer (D) and monomer (M) species as determined by the approximate in solution mass values. B) SEC-MALS data for  $HTT^{1-3144}$ -HAP40<sup>1-371</sup> reveals that  $HTT$ -HAP40 complex is more monodisperse and homogenous due to the stable mass calculated across the elution peak. B) DSLS profiles of  $HTT^{1-3144}$  Q19, Q23, Q42 and Q54 (left) and the calculated thermal aggregation temperatures which show high stability and slow transition to an aggregated state, probably reflecting the helical solenoid structure of the  $HTT$  protein. D) Similar results are seen for  $HTT^{1-3144}$ -HAP40<sup>1-371</sup> for both Q23 and Q54 samples.

## 1 **Structural analysis of the HTT-HAP40 complex in solution with SAXS**

2 The cryoEM structure of HTT-HAP40 (Guo et al., 2018) has laid a tremendous foundation for our understanding  
3 of the structure of the huntingtin protein with respect to its global architecture, HEAT repeat organisation and  
4 complex formation with the HAP40 binding partner protein. However, technical limitations of cryoEM combined  
5 with sample limitations from the conformational flexibility and heterogeneity of HTT limit our current understanding  
6 of certain structural details. The Guo *et al.* cryoEM structure was resolved at a resolution of 4-5 Å and is missing  
7 several regions of the HTT protein. Roughly 25% of the huntingtin protein, including many functionally important  
8 elements such as exon1 and the highly modified 400-650 amino acid intrinsically disordered region (IDR), are not  
9 resolved in the cryoEM maps, presumably due to the fact these regions are intrinsically disordered (**Figure 4**).

10  
11 To further understand the structure of the entire HTT protein, we conducted Small Angle X-ray Scattering (SAXS)  
12 analysis of both the Q23 isoforms of HTT (isolated monomer peak) and HTT-HAP40 complex in solution. For both  
13 HTT and HTT-HAP40 sample data, Rg-based Kratky plots of the experimental curve do not fit the expected data  
14 for a generic globular protein of similar mass (**Figure 6**). The experimentally calculated radius of gyration for both  
15 samples was also much larger than that expected on the basis of the resolved residues of the cryoEM structure  
16 (**Table 3**). This indicates that there is a degree of flexibility or disorder in both samples. This is not unexpected  
17 due to the large regions of the HTT protein sequence with predicted disorder, which are not present in the Guo *et al.*  
18 cryoEM HTT-HAP40 model. Interestingly, the normalized pair distance distribution function P(r) of HTT-HAP40  
19 shows a narrower range of atomic radii compared to the apo HTT sample, consistent with the HAP40 complex  
20 being more compact. However, taking into account the high propensity of HTT self-association observed in our  
21 analytical size-exclusion chromatography profiles, apo HTT SAXS analysis may also be confounded by self-  
22 association of molecules in the concentrated solutions used for SAXS data collection. This assertion is  
23 corroborated by the higher molecular weight estimated from SAXS data (**Table 3**) for apo HTT compared to HTT-  
24 HAP40. Therefore further SAXS analysis of the apo protein was not pursued.

25  
26 To better understand the HTT-HAP40 structure, including the disordered/missing regions of the cryo-EM model,  
27 we performed coarse-grained molecular dynamics (MD) simulations, and calculated an ensemble of  
28 conformations that best fits the solution SAXS data for HTT-HAP40. This modelling approach assumed that the  
29 residues with known coordinates in the cryoEM model form a quasi-rigid complex while the residues with missing  
30 coordinates are flexible. Predicted SAXS scattering curves were averaged over an ensemble of MD simulated  
31 structures using the optimal weights for each ensemble member obtained with the Sparse Ensemble Selection  
32 (SES) method (Berlin et al., 2013). The resulting average “theoretical” scattering curve for the SES weighted  
33 ensemble of structures gave a much better fit to the experimental scattering data than that of the cryoEM  
34 structure (**Figure 7a**).

35  
36 The most populated model (44%) in this ensemble (**Figure 7c**) shows extensive protruding regions of disorder  
37 extending out from the rigid complex core indicating how the overall envelope of the protein is likely to be larger



1 than that calculated from the cryoEM structure. For many of the HEAT repeats, the disordered regions of  
2 connecting sequence are not seen in the cryoEM structure but the molecular modelling we have completed allows  
3 us to visualise how these might be arranged with respect to the rigid HEAT repeat core structure. The complete  
4 SES ensemble (**Figure 7d**) further indicates how, in particular, the IDR and exon1 region of huntingtin are  
5 probably very structurally heterogeneous and dynamic in their conformation and are able to extend away from the  
6 more rigid core of the structure in many different arrangements due to their inherent flexibility. The extension of  
7 both exon1 and the IDR away from the core HTT-HAP40 complex is consistent with the accessibility of these  
8 domains to enzymes capable of post-translational modification.

9  
10 A key feature of the cryoEM structure is the large cavity which extends through the N-terminal HEAT repeat  
11 domain. This cavity is approximately the same diameter as a double stranded DNA helix and it is tempting to  
12 envision a potential nucleic acid binding role of this region of the HTT protein, especially given to the functional  
13 links between HTT and DNA damage repair (Ayala-Peña, 2013; Maiuri et al., 2017). At the current resolution of  
14 the structural information, it is also difficult to analyse potential surface charge or “greasy” surface residue hot  
15 spots which could indicate interaction sites. However, our SES ensemble model indicates how this cavity could be  
16 capped by certain conformational states of disordered loop regions, not resolved in the cryoEM structure. These  
17 loops could act as gatekeepers to any binding partner, nucleic acid or protein, from accessing this cavity.  
18 Similarly, an apparent cavity in the side of the N-terminal HEAT repeat domain in the cryoEM model, may also be  
19 capped by a flexible protein chain. Expansion of the polyQ region seems unlikely to affect the global structure of  
20 huntingtin given that exon1 is distal from the rigid HEAT repeat domains. Therefore, the mechanism by which the  
21 polyQ expansion affects huntingtin protein structure and function remains a question for future structural studies.

22

3

|                  | $R_g^a$ (Å) | $R_g^b$ (Å) (real) | $D_{max}^c$ (Å) | $Mw^d$ (kDa) | $Mw^e$ (kDa) |
|------------------|-------------|--------------------|-----------------|--------------|--------------|
| <b>HTT/HAP40</b> | 63.3+2.1    | 57.7+0.4           | 179             | 386 (390)    | 391          |
| <b>HTT</b>       | 69.9+2.2    | 67.7+0.8           | 220             | 422 (350)    | 428          |

**Table 3.** SAXS parameters for data validation and interpretation. a) Radius of gyration calculated using Guinier fit in the  $q$  range  $0.015 < q < 0.025 \text{ \AA}^{-1}$  and  $0.012 < q < 0.019 \text{ \AA}^{-1}$  for HTT/HAP40 and HTT, respectively. b) Radius of gyration calculated using GNOM (Feigin and Svergun, 1987). c) Maximum distance between atoms from GNOM. d) Molecular weight estimated using SAXSMoW (Fischer et al., 2010). MW expected from sequence is shown in the parentheses. e) Molecular weight estimated from SAXS data based on  $V_c$  (Rambo and Tainer, 2013).

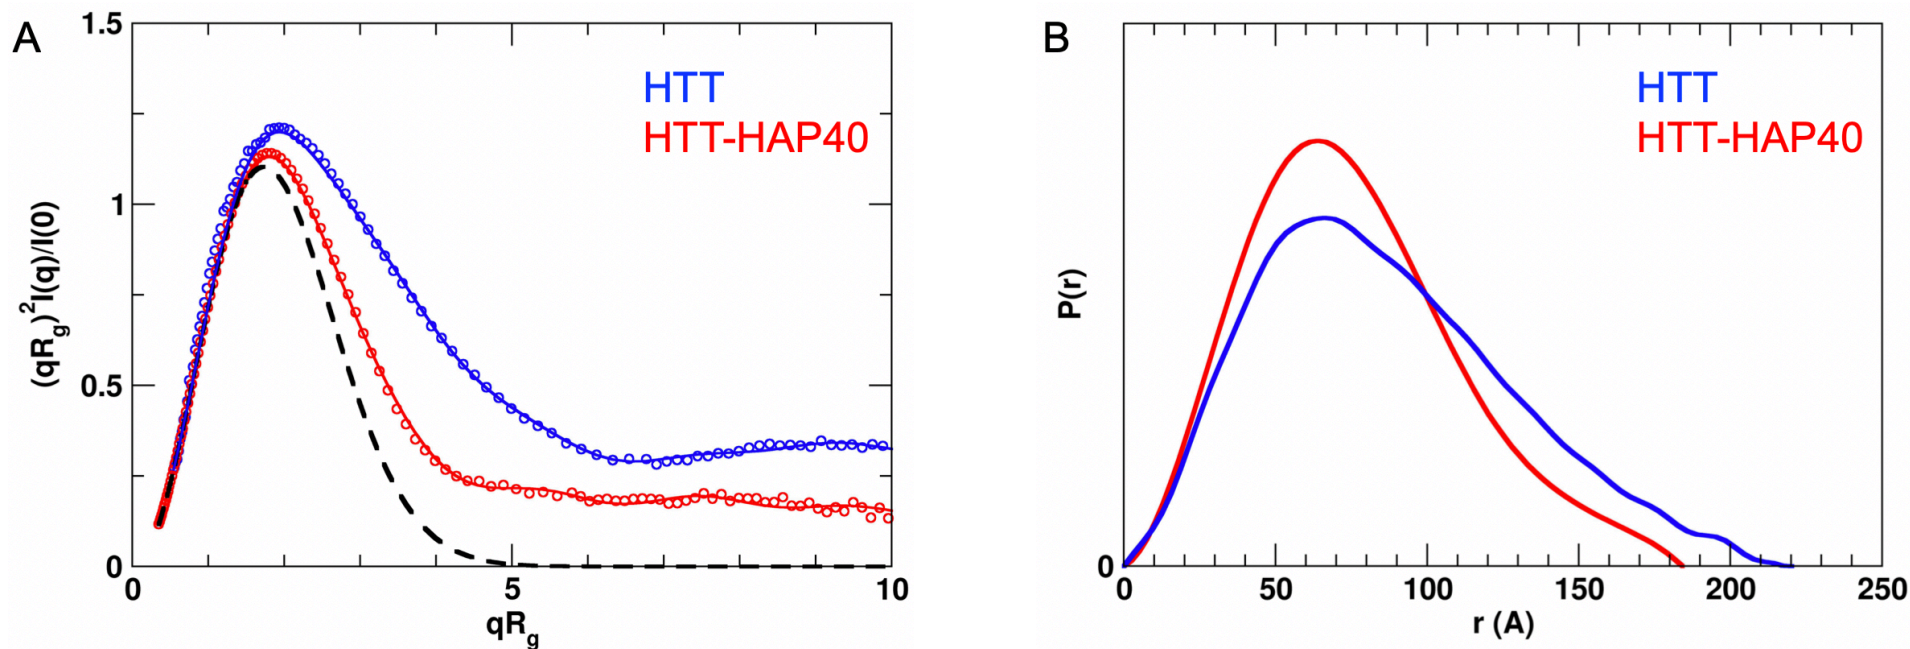

**Figure 6. Experimental SAXS data.** A)  $R_g$ -based Kratky plots of experimental SAXS data for HTT-HAP40 complex (red) and apo HTT (blue). The experimental data are displayed as empty circles. The solid lines show regularized experimental curves determined using GNOM. The theoretical curve expected for a spherical protein of similar size is shown by a dashed line. B) Normalized pair distance distribution function  $P(r)$  calculated from experimental SAXS data with GNOM.

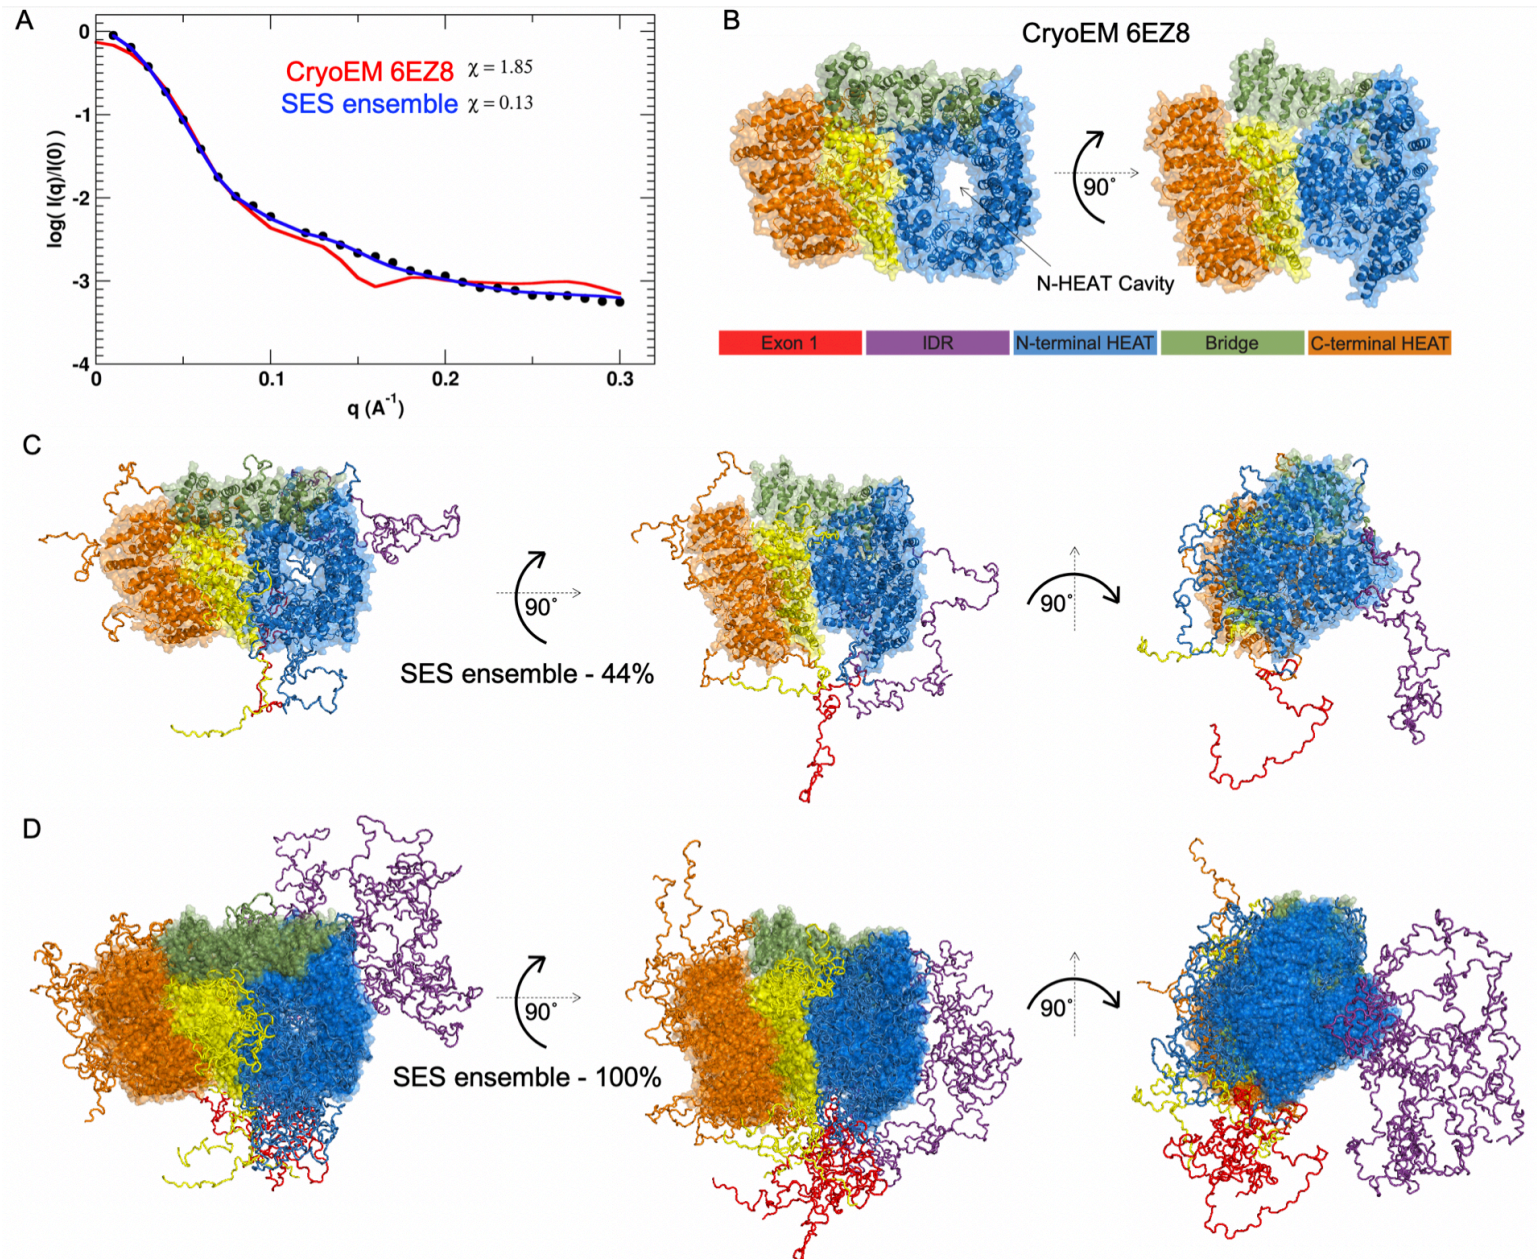

**Figure 7. Fitting SAXS data to structural models of HTT-HAP40 complex.** A) Experimental SAXS profiles (black circles) plotted with the theoretical profile for the EM structure of the HTT-HAP40 complex (red line) and the predicted profile averaged over the optimal Sparse Ensemble Selection (SES) ensemble (blue line). B) Surface representation of the EM structure as well as C) the most populated (~44 %) solution model and D) the complete ensemble of the HTT-HAP40 complex are shown with surface representation of the globular regions and backbone trace of the flexible regions (colour key as in panel B).

## 1 DISCUSSION

2 We have generated a resource of 28 different HTT expression constructs which allow the generation of purified  
3 HTT samples of different polyQ lengths and affinity tags from three different expression systems. All constructs  
4 are available through Addgene, including the entry vector which will allow other researchers to make additional  
5 CAG expansion forms of the HTT gene should they require them. Our expression constructs permit facile scaling  
6 of culture volumes to enable the purification of milligram quantities of wild-type HTT protein from both insect and  
7 mammalian cells as well as substantial production of various polyQ expanded HTT species.

8  
9 These HTT proteins from different expression systems are modified with PTMs previously described in the  
10 literature as well as additional modifications of unknown physiological relevance but that do not seem to alter  
11 HTT function in its ability to form a complex with HAP40. We describe HTT protein methylation for the first time,  
12 a modification conferred by various protein methyltransferases, many with links to neurodegeneration (Ackloo et  
13 al., 2017). Further characterisation of these modifications and their function could open up novel avenues to  
14 understanding HTT protein structure-function. The constructs cloned may also be used in future studies for co-  
15 expression with modifying enzymes to make highly site-specific PTMs on the sample as well as to test how  
16 certain enzymes might function on HTT.

17  
18 Our work characterising the biophysical properties of HTT confirms that the protein is not monodisperse or  
19 homogenous when purified in its apo form. Coexpression and purification with HAP40 allows purification of a  
20 more monodisperse protein sample, rendering it amenable to more detailed structural analysis, as performed  
21 previously by cryoEM (Guo et al., 2018), but also by SAXS. It is unclear whether HAP40 is a constitutive binder  
22 of HTT in physiological settings although its effects on the biophysical characteristics of the HTT protein are  
23 clearly significant. Interestingly, very few HTT protein-protein interaction studies have identified HAP40 as an  
24 interacting protein of HTT and it is only identified in the published literature in a small number of articles (Guo et  
25 al., 2018; Peters and Ross, 2001) compared to the multiple extensive HTT interaction network publications  
26 (Ratovitski et al., 2012; Shirasaki et al., 2012).

27  
28 Our SAXS analysis in tandem with molecular dynamics simulations permitted the generation of an SES  
29 ensemble, representing a possible solution structure of the HTT-HAP40 complex. This model gives insight into  
30 how HTT is post-translationally modified at flexible and accessible regions of sequence and suggests potential  
31 regulatory mechanisms such as steric capping of binding regions of the protein. Our SAXS model serves as an  
32 important resource for understanding the complete HTT-HAP40 complex, and should help prevent  
33 misinterpretation of certain features of the cryoEM structure which lacks ~26% of the protein molecule. In  
34 particular, the exon1 region of HTT is distal to the complex core and polyQ expansion does not affect HTT  
35 thermal stability as shown by DSLS. Therefore, it is likely that the effect of polyQ expansion on HTT structure-  
36 function is more nuanced. Both exon1 and the IDR have many of the hallmarks of interacting domains observed  
37 for intrinsically disordered protein regions (Darling and Uversky, 2018), as they are heavily modified by PTMs,  
38 are conformationally flexible and contain regions of charged amino acids (i.e. nearly 20 % of residues in the IDR

1 are negatively charged). The purported role of huntingtin as a scaffold protein could be explained through  
2 dynamic protein-protein interactions mediated through these regions of the structure.

3

4 The precise molecular function of unexpanded HTT remains elusive, so it is unclear how the polyQ expansion  
5 may alter the HTT protein sufficiently to give rise to the wide-ranging biochemical dysfunction observed in HD  
6 models and patients. These reagents and the accompanying methods and validation for the production of HTT  
7 protein will provide an enabling framework for future research requiring purified HTT and its complexes for a  
8 wide range of polyQ lengths.

## 1 MATERIALS AND METHODS

2

### 3 Cloning of HTT and HAP40 expression constructs

4 HTT expression constructs were assembled in two steps into the mammalian/insect cell vector pBMDEL, a  
5 unencumbered vector created for open distribution of these reagents. First, entry vectors for N-terminal Flag  
6 tagged and C-terminal FLAG-tagged HTT (amino acids 1-3144) were constructed without the polyQ regions,  
7 amino acids 7-85. PCR products encoding wildtype HTT were amplified from cDNA (Kazusa Clone FHC15881)  
8 using primers N\_int\_FWD  
9 (ttaagaaggagatatactATGGACTACAAAGACGATGACGACAAGATGGCGACCCTGGAAAAGCgctGACCTTAGTC  
10 GCTAAcctgcaGGAGCCGCTGCACCGACCAAAG) / N\_int\_REV  
11 (gattggaagtagaggtttaGCAGGTGGTGACCTTGTGGAC) for the N-terminal FLAG-tagged HTT and C\_int\_FWD  
12 (ttaagaaggagatatactATGGCGACCCTGGAAAAGCgctGACCTTAGTCGCTAAcctgcaGGAGCCGCTGCACCGAC  
13 CAAAG) / C\_int\_REV  
14 (gattggaagtagaggtttaCTTGTGTCATCGTCTTTGTAGTCaccgctccaccGCAGGTGGTGACCTTGTGGAC) for  
15 the C-terminal FLAG-tagged HTT. All PCR products were inserted using the In-Fusion cloning kit (Clontech) into  
16 the pBMDEL which had been linearized with BfuAI. Second, synthetic polyQ regions were inserted into the  
17 intermediate plasmids using the In-Fusion cloning kit. The polyQ regions were PCR amplified using the primers  
18 polyQP\_Fwd (ATGGCGACCCTGGAAAAGCTG) / polyQP\_Rev (TGGTCGGTGCAGCGGCTCCTC) from  
19 template plasmids CH00007 (Q23), CH00008 (Q73), and CH00065 (Q145) (all from Coriell Institute  
20 biorepository). PCR products were inserted into the intermediate vectors which had been linearized with AfeI  
21 and SbfI. Upon screening the assembled HTT expression constructs we found that our cloning method  
22 generated a range of polyQ lengths. We selected constructs with polyQ lengths from Q15 to Q145. The HTT  
23 coding sequences of intermediate and final expression constructs were confirmed by DNA sequencing. The  
24 sequences were confirmed by Addgene where these reagents have been deposited. HAP40 cDNA  
25 corresponding to amino acids 1-371 was subcloned into pFBOH-MHL expression vector using ligase  
26 independent cloning.

27

### 28 HTT and HTT-HAP40 protein expression

29 The recombinant transfer vectors HTT pBMDEL and HAP40 pFBOH-MHL were transformed into DH10Bac E.  
30 coli cells (Invitrogen, Bac-to-Bac System) to generate recombinant Bacmid DNA. Sf9 cells (Invitrogen) were  
31 transfected with Bacmid DNA using jetPRIME® transfection reagent (PolyPlus Transfection, Cat. 89129-924),  
32 and recombinant baculovirus particles were recovered. The recombinant virus titre was sequentially amplified  
33 from P1 to P3 viral stocks for protein production in the Sf9 insect cells and EXPI293F mammalian cells.  
34 Baculovirus-mediated expression of HTT in Insect Cells: Sf9 cells at a density of ~4.5 million cells per mL were  
35 infected with 8 mL of P3 recombinant baculovirus and grown at 130 rpm and 27°C. HyQ SFX insect serum  
36 medium containing 10 µg/mL gentamicin was used as the culture medium. Infected cells were harvested when  
37 viability dropped to 80%–85%, normally after ~72 h post-infection. For HTT-HAP40 complex production, the  
38 same general protocol was followed but with a 3:1 ratio of HTT:HAP40 P3 recombinant baculovirus infection  
39 step.

1 Transduction of HTT in Mammalian Cells: EXPI293F cells (Thermo Fisher, Cat. A14527) were maintained  
2 in EXPI293 Expression Medium (Thermo Fisher, Cat. A1435102) in a humidified 8 % CO<sub>2</sub> incubator at 37 °C and  
3 125 rpm. Cells were transduced at a density of 2-3 million cells per mL culture. The transduction used  
4 recombinant baculoviruses of HTT constructs generated by transfecting Sf9 cells using Transfer vector pBMDEL  
5 and JetPRIME® transfection reagent (Cat. 89129-924). The volume of the virus added into the cells was at ratio  
6 as 6% of the total volume of the production. Infected cells were harvested after 7-10 days post-  
7 transduction depending on cell viability.

8 Transient Transfection of HTT in Mammalian Cells: EXPI293F cells (Thermo Fisher, Cat. A14527) were  
9 maintained in EXPI293 Expression Medium (Thermo Fisher, Cat. A1435102) in a humidified 8 % CO<sub>2</sub> incubator  
10 at 37 °C and 125 rpm. Cells were transfected at a density of 2-3 million cells per mL culture.  
11 FectoPRO® transfection reagent (VWR, Cat. 116-001) and plasmid pBMDEL-HTT DNA were separately diluted  
12 in serum-free OptiMEM complexation medium (Thermo Fisher, Cat. 31985062) at 10% of the total production  
13 volume in a ratio of 1 µg DNA to 1.2 µL FectoPro to 0.5 µL Booster per mL cell culture. After 5 min of incubation  
14 at room temperature, the transfection mixtures were combined and incubated for an additional 20 min. The  
15 FectoPRO® transfection reagent-DNA-OptiMEM mixture was then added to cells with an addition of FectoPRO®  
16 Booster in a ratio of 1 µg DNA to 1.2 µL FectoPro to 0.5 µL Booster per mL cell culture. The transfected cultures  
17 of EXPI293 cells were harvested after 72- 96 h post-transfection dependent cells density and viability.

#### 18 19 **HTT and HTT-HAP40 protein purification**

20 The same protocol was used to purify HTT from insect and mammalian cell culture. Cell cultures were harvested  
21 by centrifugation at 4000 rpm, 20 mins, 4 °C (Beckman JLA 8.1000), washed in pre-chilled PBS and  
22 resuspended in 20 cell paste volumes of preparation buffer (50 mM Tris pH 8, 500 mM NaCl) and stored at -80  
23 °C prior to purification. Cell suspensions were thawed and diluted to at least 50 times the cell paste volumes with  
24 prechilled buffer and supplemented with 1 mM PMSF, 1 mM benzamidine-HCl and 20 U/mL benzonase. NB: two  
25 freeze-thaw cycles of cell suspensions were found to be sufficient for cell lysis. The lysate was clarified by  
26 centrifugation at 14,000 rpm, 1 h, 4 °C (Beckman JLA 16.2500) and then bound to 0.1 cell paste volumes of anti-  
27 FLAG resin (Sigma M2) at 4 °C with rocking for 2 hours. Anti-FLAG resin was washed twice with the 100 cell  
28 paste volumes of buffer. HTT protein was eluted with 1 cell paste volume of buffer supplemented with 250 µg/mL  
29 3xFLAG peptide (Chempep) run twice over the anti-FLAG resin. Residual HTT protein was washed from the  
30 beads with 0.5 cell paste volume of buffer. The sample was spin concentrated with MWCO 100,000. Depending  
31 on the protein yield, the sample was run as one or more sample runs on Superose 6 10/300 GL column in size-  
32 exclusion chromatography buffer (20 mM HEPES pH 7.5, 300 mM NaCl, 5 % (v/v) glycerol, 1 mM TCEP) at 0.4  
33 mL/min ensuring no more than 2 mg of protein was applied per run to minimize protein aggregation. For HTT-  
34 HAP40, the same protocol was followed except for using preparation buffer with just 300 mM NaCl, and an  
35 additional step where FLAG elution was rocked with 2 mL equilibrated Ni-NTA resin for 30 mins before washing  
36 in preparation buffer and then elution with buffer supplemented with 300 mM imidazole prior to the size-  
37 exclusion chromatography step.



## 1 **SDS-PAGE and Western Blot analysis**

2 SDS-PAGE and Western blot analysis were performed according to standard protocols. In brief, purified proteins  
3 were denatured in sample buffer (50 mM Tris HCl, 0.1 M DTT, 2% SDS, 0.1% bromophenol blue and 10%  
4 glycerol, pH 6.8) at 98°C for 5 min, followed by sodium dodecyl sulfate polyacrylamide gel electrophoresis (SDS-  
5 PAGE). After electrophoresis, the gel was either directly stained with Coomassie Blue or subjected to Western  
6 blot analysis. For Western blot analysis, proteins were transferred onto PVDF membranes. The primary antibody  
7 used was anti-HTT (Abcam, ab109115, 1:5000) and the secondary antibody used was IRDye® 800CW anti-  
8 rabbit IgG (LI-COR, 926-32211, 1:5000). Membranes were visualised on an Odyssey® CLx Imaging System (LI-  
9 COR).

10

## 11 **HTT mass spectrometry**

12 All data was acquired on an Agilent 1260 capillary HPLC system coupled to an Agilent Q-TOF 6545 mass  
13 spectrometer via the Dual Agilent Jetstream ion source.

14 Bottom-up proteomics for sequence coverage and PTM analysis: Proteins were processed according to  
15 established protocols (Gundry et al., 2001). Briefly, proteins were reduced with DTT (10 mM final concentration)  
16 for 30 minutes at room temperature, alkylated with iodoacetamide (55 mM final concentration) for 30 minutes at  
17 room temperature, and incubated with trypsin (6 µL, 0.2 mg/mL) overnight at 37 °C. The digests acidified to pH 2  
18 in hydrochloric acid and desalted on-column (by diverting the first two minutes to waste), before analysis.

19 Peptides were separated on a C18 Advance BioPeptide column (2.1x150 mm 2.7 micron particles) at a flow rate  
20 of 400 microliters/min and an operating pressure of 4,700 psi. Peptides were eluted using a gradient from 100%  
21 solvent A (98:2 H<sub>2</sub>O:ACN with 1% formic acid) to 50% B (96:4 ACN:H<sub>2</sub>O with 1% formic acid) in 80 minutes.

22 Mass spectra were acquired from m/z 300–1700 at a rate of 8 spectra per second. The tandem mass spectra  
23 were acquired in automated MS/MS mode from m/z 100-1500 with an acquisition rate of 3 spectra per second.  
24 The top ten precursors were selected and sorted by abundance only. Collision-induced dissociation was done  
25 using all ions at 4\*(m/z)/100-1 and -5.

26 Data analysis: Raw data was processed using PEAKS Studio 8.5 (build 20171002) and the reference complete  
27 human proteome FASTA file (Uniprot). Cysteine carbamidomethylation was selected as a fixed modification, and  
28 methionine oxidation and N/Q deamidation as variable modifications. A minimum peptide length of five, a  
29 maximum of three missed cleavage sites, and a maximum of three labelled amino acids per peptide were  
30 employed.

31

## 32 **HTT sequence disorder prediction**

33 Disorder prediction was performed using IUPred (Dosztányi et al., 2005a, 2005b) A threshold of 0.5 was used to  
34 define disordered or ordered regions, with predicted disordered regions shaded in light red. Further sequence  
35 analysis of HTT was performed using the sequence analysis tool local CIDER (Holehouse et al., 2017).  
36 Hydrophobicity was calculated using a normalized Kyte-Doolittle scale (Kyte and Doolittle, 1982). Resolved  
37 structure and domain annotations based on the solved cryo-EM structure of HTT in complex with HAP40 (Guo et  
38 al., 2018).

39

1  
2  
3  
4  
5  
6  
7  
8  
9  
10  
11  
12  
13  
14  
15  
16  
17  
18  
19  
20  
21  
22  
23  
24  
25  
26  
27  
28  
29  
30  
31  
32  
33  
34  
35  
36  
37  
38

## Differential static light scattering (DSLS)

The thermal stability of HTT<sup>1-3144</sup> Q19, Q23, Q42 and Q54 as well as HTT<sup>1-3144</sup>-HAP40<sup>1-371</sup> Q23 and Q54 samples were analysed by DSLS using StarGazer. HTT and HTT-HAP40 proteins at 1 mg/mL in 20 mM HEPES pH 7.5, 300 mM NaCl, 5 % (v/v) glycerol, 1 mM TCEP were heated from 20 °C to 85 °C. Protein aggregation was monitored using a CCD camera. The temperature of aggregation ( $T_{agg}$ ) was analysed and fitted as described previously (Senisterra et al., 2006).

## Size Exclusion Chromatography Multi-Angle Light Scattering (SEC-MALS)

The absolute molar masses and mass distributions of purified protein samples of HTT<sup>1-3144</sup> Q23 and HTT<sup>1-3144</sup> Q23-HAP40<sup>1-371</sup> complex with C-terminal FLAG tag at 1 mg/mL were determined using SEC-MALS. Samples were injected through a Superose 6 10/300 GL column (GE Healthcare Life Sciences) equilibrated in 20 mM HEPES pH 7.5, 300 mM NaCl, 5 % (v/v) glycerol, 1 mM TCEP followed in-line by a Dawn Heleos-II light scattering detector (Wyatt Technologies) and a 2414 refractive index detector (Waters). Molecular mass calculations were performed using ASTRA 6.1.1.17 (Wyatt Technologies) assuming a  $dn/dc$  value of 0.185 ml/g.

## SAXS data collection and analysis

SAXS measurements were carried out at the beamline 12-ID-B of the Advanced Photon Source, Argonne National Laboratory. The energy of the X-ray beam was 14 Kev (wavelength  $\lambda=0.8856$  Å), and two setups (small- and wide- angle X-ray scattering, SAXS and WAXS) were used simultaneously to cover scattering  $q$  ranges of  $0.006 < q < 2.6$  Å<sup>-1</sup>, where  $q = (4\pi/\lambda)\sin\theta$ , and  $2\theta$  is the scattering angle. Thirty two-dimensional images were recorded for each buffer or sample solutions using a flow cell, with the accumulated exposure time of 0.8-2 seconds to reduce radiation damage and obtain good statistics. No radiation damage was observed as confirmed by the absence of systematic signal changes in sequentially collected X-ray scattering images. The 2D images were corrected and reduced to 1D scattering profiles using the Matlab software package at the beamlines. The 1D SAXS profiles were grouped by sample and averaged.

Concentration-series measurements for each sample were carried out at 300K. We used HTT concentrations of 1.0, 2.0, and 4.0 mg/mL, and complex HTT/HAP40 concentrations of 0.5, 1.0, and 2.0 mg/mL, respectively in 20 mM HEPES pH 7.5, 300 mM NaCl, 5 % (v/v) glycerol, 1 mM TCEP. The data were processed and analyzed with ATSAS program package (Konarev et al., 2006). The scattering profile of the protein was calculated by subtracting the background buffer contribution from the sample-buffer profile and the difference data were extrapolated to zero solute concentration by standard procedures. Guinier analysis and the experimental radius of gyration ( $R_g$ ) estimation from the data of infinite dilution were performed using PRIMUS. The pair distance distribution function (PDDF),  $p(r)$ , and the maximum dimension of the protein,  $D_{max}$ , in real space was calculated with the indirect Fourier transform using program GNOM (Feigin and Svergun, 1987). The molecular weights were estimated separately based on volume calculated by SAXMoW (Fischer et al., 2010), and Volume of correlation  $V_c$  (Rambo and Tainer, 2013) calculated by DATVC in  $q$  range of  $0 < q < 0.3$  Å<sup>-1</sup>. The theoretical

1 scattering intensity of a structural model was calculated and fitted to the experimental scattering intensity using  
2 CRY SOL (Svergun et al., 1995) and FoXS (Schneidman-Duhovny et al., 2010) programs.

#### 4 **Fitting structural ensemble to SAXS data**

5 The SAXS data indicate that the HTT/HAP40 complex possess some degree of flexibility. The known EM  
6 structure of the complex (PDB: 6ez8) is missing ~26% of the residues and it does not fit the SAXS data. We  
7 assume that the residues with known coordinates form a quasi-rigid part of the complex while the residues with  
8 missing coordinates are flexible. We performed coarse-grained MD simulations to generate the initial ensemble  
9 of possible conformations of the complex. MD trajectory of 1000ns was generated at 300K and theoretical  
10 scattering profiles in the  $q$  range  $0 < q < 0.3 \text{ \AA}^{-1}$  for 5000 frames taken from the trajectory were calculated using  
11 FoXS. The calculated scattering curves were averaged over the entire ensemble of structures using the optimal  
12 weights for each ensemble member obtained with SES method (Berlin et al., 2013), and this average profile was  
13 compared with the experimental scattering data.

#### 15 **Coarse-grained molecular dynamics simulations**

16 We used a coarse-grained model of HTT/HAP40 protein complex in order to enhance the sampling efficiency in  
17 the conformational space of the complex. In this model, amino acid residues in the proteins are represented as  
18 single beads located at their  $C_\alpha$  positions and interacting via appropriate bonding, bending, torsion-angle, and  
19 non-bonding potential. A Gō-like model of Clementi and Onuchic (Clementi et al., 2000) was employed to  
20 maintain the structured, globular domains as quasi-rigid in the simulation. For flexible regions, we adopt simple  
21 model in which adjacent amino acids beads are joined together into a polymer chain by means of virtual bond  
22 and angle interactions with a quadratic potential.

$$23 \quad V_b = K_b(b - b_0)^2 ; \quad V_\alpha = K_\alpha(\alpha - \alpha_0)^2$$

24 with the constants  $K_b = 50 \text{ kcal/mol}$  and  $K_\alpha = 1.75 \text{ kcal/mol}$  and the equilibrium values  $b_0 = 3.8 \text{ \AA}$  and  $\alpha_0 = 112^\circ$   
25 for bonds and angles, respectively. The excluded volume between nonbonded beads was treated with pure  
26 repulsive potential

$$27 \quad V_R = \epsilon_R(\sigma_R / r_{ij})^{12}$$

28 where  $r_{ij}$  is the inter-bead distance,  $\sigma_R = 4 \text{ \AA}$ , and  $\epsilon_R = 2.0 \text{ kcal/mol}$ .

29 The interaction between quasi-rigid domains is modeled with the residue- specific pair interaction potentials that  
30 combine short-range interactions with the long-range electrostatics as it described (Kim and Hummer, 2008; Kim  
31 et al., 2008). The short-range interaction is given by a Lennard-Jones 12-10-6 -type potential and simple Debye-  
32 Hückel-type potential is used for the electrostatics interactions (Kim et al., 2008). In this study we used the  
33 dielectric constant of 80 and the Debye screening length of  $10 \text{ \AA}$ , which corresponds to a salt concentration of  
34 about 100 mM. In-house software was developed and used to carry out constant temperature molecular  
35 dynamics simulations of the coarse-grained model described above.

## 1 **ACKNOWLEDGEMENTS**

2 We thank Dr. Xiaobing Zuo (Argonne National Laboratory) for expert support with SAXS measurements, and  
3 acknowledge the use of the SAXS Core facility of Center for Cancer Research (CCR), National Cancer Institute  
4 (NCI) which is funded by Frederick National Laboratory for Cancer Research under contract  
5 HHSN261200800001E and the intramural research program of the NIH, NCI, CCR. The content of this  
6 publication does not necessarily reflect the views or policies of the Department of Health and Human Services,  
7 nor does mention of trade names, commercial products or organizations imply endorsement by the US  
8 Government. This research used 12-ID-B beamline of the Advanced Photon Source, a U.S. Department of  
9 Energy (DOE) Office of Science User Facility operated for the DOE Office of Science by Argonne National  
10 Laboratory under Contract No. DE-AC02-06CH11357. We also acknowledge Dr. Pravin Mahajan who  
11 constructed the pBMDEL vector. This research was supported by a Huntington's Disease Society of America  
12 Berman Topper Career Development Fellowship (RH), the Natural Sciences and Engineering Research Council  
13 of Canada (CHA) (grant RGPIN-2015-05939), Huntington Society of Canada (CHA), CHDI Foundation (LTS,  
14 CHA) and the SGC, a registered charity (number 1097737) that receives funds from AbbVie, Bayer Pharma AG,  
15 Boehringer Ingelheim, Canada Foundation for Innovation, Eshelman Institute for Innovation, Genome Canada  
16 through Ontario Genomics Institute [OGI-055], Innovative Medicines Initiative (EU/EFPIA) [ULTRA-DD grant no.  
17 115766], Janssen, Merck KGaA, Darmstadt, Germany, MSD, Novartis Pharma AG, Ontario Ministry of  
18 Research, Innovation and Science (MRIS), Pfizer, São Paulo Research Foundation-FAPESP, Takeda, and  
19 Wellcome. ASH is a postdoctoral fellow in the laboratory of R.V. Pappu at Washington University in St. Louis and  
20 is funded by the Human Frontiers Science Program (grant RGP0034/2017).

## 21 22 **AUTHOR CONTRIBUTIONS**

23 Constructs were cloned by PL. Protein expression and purification experiments were performed by RJH, AH,  
24 BH, JCH and AS. Mass spectrometry experiments were conducted by RJH and SA. In silico sequence analysis  
25 was conducted by ASH. SAXS experiments were conducted by RJH, AL and LF. Other biophysical experiments  
26 were conducted by RJH. RJH, CHA and LTS conceived the project. CHA supervised research. All authors  
27 contributed to manuscript preparation.

## 28 29 **RAW DATA AND ANALYSIS FILES**

30 All contributing data and analysis files for this manuscript can be found under Creative Commons Attribution 4.0  
31 International license in Zenodo: <https://zenodo.org/record/2169035>

## 32 33 **COMPETING INTERESTS**

34 The authors declare no financial or non-financial competing interests.

## 1 REFERENCES

- 2  
3 Ackloo, S., Brown, P.J., and Müller, S. (2017). Chemical probes targeting epigenetic proteins: Applications beyond  
4 oncology. *Epigenetics* 12, 378–400.
- 5 Anne, S.L., Saudou, F., and Humbert, S. (2007). Phosphorylation of huntingtin by cyclin-dependent kinase 5 is  
6 induced by DNA damage and regulates wild-type and mutant huntingtin toxicity in neurons. *J. Neurosci. Off. J. Soc.*  
7 *Neurosci.* 27, 7318–7328.
- 8 Ayala-Peña, S. (2013). Role of oxidative DNA damage in mitochondrial dysfunction and Huntington's disease  
9 pathogenesis. *Free Radic. Biol. Med.* 62, 102–110.
- 10 Beausoleil, S.A., Villén, J., Gerber, S.A., Rush, J., and Gygi, S.P. (2006). A probability-based approach for high-  
11 throughput protein phosphorylation analysis and site localization. *Nat. Biotechnol.* 24, 1285–1292.
- 12 Beli, P., Lukashchuk, N., Wagner, S.A., Weinert, B.T., Olsen, J.V., Baskcomb, L., Mann, M., Jackson, S.P., and  
13 Choudhary, C. (2012). Proteomic investigations reveal a role for RNA processing factor THRAP3 in the DNA  
14 damage response. *Mol. Cell* 46, 212–225.
- 15 Berlin, K., Castañeda, C.A., Schneidman-Duhovny, D., Sali, A., Nava-Tudela, A., and Fushman, D. (2013).  
16 Recovering a Representative Conformational Ensemble from Underdetermined Macromolecular Structural Data. *J.*  
17 *Am. Chem. Soc.* 135, 16595–16609.
- 18 Bian, Y., Song, C., Cheng, K., Dong, M., Wang, F., Huang, J., Sun, D., Wang, L., Ye, M., and Zou, H. (2014). An  
19 enzyme assisted RP-RPLC approach for in-depth analysis of human liver phosphoproteome. *J. Proteomics* 96,  
20 253–262.
- 21 Blom, N., Gammeltoft, S., and Brunak, S. (1999). Sequence and structure-based prediction of eukaryotic protein  
22 phosphorylation sites. *J. Mol. Biol.* 294, 1351–1362.
- 23 Boeing, S., Williamson, L., Encheva, V., Gori, I., Saunders, R.E., Instrell, R., Aygün, O., Rodriguez-Martinez, M.,  
24 Weems, J.C., Kelly, G.P., et al. (2016). Multiomic Analysis of the UV-Induced DNA Damage Response. *Cell Rep.*  
25 15, 1597–1610.
- 26 Brill, L.M., Xiong, W., Lee, K.-B., Ficarro, S.B., Crain, A., Xu, Y., Terskikh, A., Snyder, E.Y., and Ding, S. (2009).  
27 Phosphoproteomic analysis of human embryonic stem cells. *Cell Stem Cell* 5, 204–213.
- 28 Britton, D., Zen, Y., Quaglia, A., Selzer, S., Mitra, V., Löbner, C., Jung, S., Böhm, G., Schmid, P., Prefot, P., et al.  
29 (2014). Quantification of pancreatic cancer proteome and phosphorylome: indicates molecular events likely  
30 contributing to cancer and activity of drug targets. *PloS One* 9, e90948.
- 31 Cariulo, C., Azzollini, L., Verani, M., Martufi, P., Boggio, R., Chiki, A., Deguire, S.M., Cherubini, M., Gines, S.,  
32 Marsh, J.L., et al. (2017). Phosphorylation of huntingtin at residue T3 is decreased in Huntington's disease and  
33 modulates mutant huntingtin protein conformation. *Proc. Natl. Acad. Sci. U. S. A.* 114, E10809–E10818.
- 34 Carrier, M., Joint, M., Lutzinger, R., Page, A., and Rochette-Egly, C. (2016). Phosphoproteome and Transcriptome of  
35 RA-Responsive and RA-Resistant Breast Cancer Cell Lines. *PloS One* 11, e0157290.
- 36 Christensen, G.L., Kelstrup, C.D., Lyngsø, C., Sarwar, U., Bøgebo, R., Sheikh, S.P., Gammeltoft, S., Olsen, J.V.,  
37 and Hansen, J.L. (2010). Quantitative phosphoproteomics dissection of seven-transmembrane receptor signaling  
38 using full and biased agonists. *Mol. Cell. Proteomics MCP* 9, 1540–1553.
- 39 Clementi, C., Nymeyer, H., and Onuchic, J.N. (2000). Topological and energetic factors: what determines the  
40 structural details of the transition state ensemble and “en-route” intermediates for protein folding? An investigation  
41 for small globular proteins. *J. Mol. Biol.* 298, 937–953.
- 42 Colin, E., Zala, D., Liot, G., Rangone, H., Borrell-Pagès, M., Li, X.-J., Saudou, F., and Humbert, S. (2008).  
43 Huntingtin phosphorylation acts as a molecular switch for anterograde/retrograde transport in neurons. *EMBO J.* 27,  
44 2124–2134.
- 45 Darling, A.L., and Uversky, V.N. (2018). Intrinsic Disorder and Posttranslational Modifications: The Darker Side of  
46 the Biological Dark Matter. *Front. Genet.* 9.
- 47 Daub, H., Olsen, J.V., Bairlein, M., Gnad, F., Oppermann, F.S., Körner, R., Greff, Z., Kéri, G., Stemmann, O., and  
48 Mann, M. (2008). Kinase-selective enrichment enables quantitative phosphoproteomics of the kinome across the  
49 cell cycle. *Mol. Cell* 31, 438–448.
- 50 Dephoure, N., Zhou, C., Villén, J., Beausoleil, S.A., Bakalarski, C.E., Elledge, S.J., and Gygi, S.P. (2008). A  
51 quantitative atlas of mitotic phosphorylation. *Proc. Natl. Acad. Sci. U. S. A.* 105, 10762–10767.

- 1 Dong, G., Callegari, E., Gloeckner, C.J., Ueffing, M., and Wang, H. (2012). Mass spectrometric identification of  
2 novel posttranslational modification sites in Huntingtin. *Proteomics* 12, 2060–2064.
- 3 Dosztányi, Z., Csizsmok, V., Tompa, P., and Simon, I. (2005a). IUPred: web server for the prediction of intrinsically  
4 unstructured regions of proteins based on estimated energy content. *Bioinforma. Oxf. Engl.* 21, 3433–3434.
- 5 Dosztányi, Z., Csizsmok, V., Tompa, P., and Simon, I. (2005b). The pairwise energy content estimated from amino  
6 acid composition discriminates between folded and intrinsically unstructured proteins. *J. Mol. Biol.* 347, 827–839.
- 7 Feigin, L.A., and Svergun, D.I. (1987). *Structure Analysis by Small-Angle X-Ray and Neutron Scattering* (Springer  
8 US).
- 9 Fischer, H., Neto, O., De, M., Napolitano, H.B., Polikarpov, I., and Craievich, A.F. (2010). Determination of the  
10 molecular weight of proteins in solution from a single small-angle X-ray scattering measurement on a relative scale.  
11 *J. Appl. Crystallogr.* 43, 101–109.
- 12 Franz-Wachtel, M., Eisler, S.A., Krug, K., Wahl, S., Carpy, A., Nordheim, A., Pfizenmaier, K., Hausser, A., and  
13 Macek, B. (2012). Global detection of protein kinase D-dependent phosphorylation events in nocodazole-treated  
14 human cells. *Mol. Cell. Proteomics MCP* 11, 160–170.
- 15 Gauci, S., Helbig, A.O., Slijper, M., Krijgsveld, J., Heck, A.J.R., and Mohammed, S. (2009). Lys-N and trypsin cover  
16 complementary parts of the phosphoproteome in a refined SCX-based approach. *Anal. Chem.* 81, 4493–4501.
- 17 Guo, Q., Bin Huang, null, Cheng, J., Seefelder, M., Engler, T., Pfeifer, G., Oeckl, P., Otto, M., Moser, F., Maurer,  
18 M., et al. (2018). The cryo-electron microscopy structure of huntingtin. *Nature*.
- 19 Han, G., Ye, M., Liu, H., Song, C., Sun, D., Wu, Y., Jiang, X., Chen, R., Wang, C., Wang, L., et al. (2010).  
20 Phosphoproteome analysis of human liver tissue by long-gradient nanoflow LC coupled with multiple stage MS  
21 analysis. *Electrophoresis* 31, 1080–1089.
- 22 Holehouse, A.S., Das, R.K., Ahad, J.N., Richardson, M.O.G., and Pappu, R.V. (2017). CIDER: Resources to  
23 Analyze Sequence-Ensemble Relationships of Intrinsically Disordered Proteins. *Biophys. J.* 112, 16–21.
- 24 Hornbeck, P.V., Zhang, B., Murray, B., Kornhauser, J.M., Latham, V., and Skrzypek, E. (2015). PhosphoSitePlus,  
25 2014: mutations, PTMs and recalibrations. *Nucleic Acids Res.* 43, D512–D520.
- 26 Hsu, P.P., Kang, S.A., Rameseder, J., Zhang, Y., Ottina, K.A., Lim, D., Peterson, T.R., Choi, Y., Gray, N.S., Yaffe,  
27 M.B., et al. (2011). The mTOR-regulated phosphoproteome reveals a mechanism of mTORC1-mediated inhibition  
28 of growth factor signaling. *Science* 332, 1317–1322.
- 29 Huang, B., Lucas, T., Kueppers, C., Dong, X., Krause, M., Bepperling, A., Buchner, J., Voshol, H., Weiss, A.,  
30 Gerrits, B., et al. (2015). Scalable Production in Human Cells and Biochemical Characterization of Full-Length  
31 Normal and Mutant Huntingtin. *PLOS ONE* 10, e0121055.
- 32 Huesgen, P.F., Lange, P.F., Rogers, L.D., Solis, N., Eckhard, U., Kleifeld, O., Goulas, T., Gomis-Rüth, F.X., and  
33 Overall, C.M. (2015). LysargiNase mirrors trypsin for protein C-terminal and methylation-site identification. *Nat.*  
34 *Methods* 12, 55–58.
- 35 Humbert, S., Bryson, E.A., Cordelières, F.P., Connors, N.C., Datta, S.R., Finkbeiner, S., Greenberg, M.E., and  
36 Saudou, F. (2002). The IGF-1/Akt pathway is neuroprotective in Huntington’s disease and involves Huntingtin  
37 phosphorylation by Akt. *Dev. Cell* 2, 831–837.
- 38 Humphrey, S.J., Yang, G., Yang, P., Fazakerley, D.J., Stöckli, J., Yang, J.Y., and James, D.E. (2013). Dynamic  
39 adipocyte phosphoproteome reveals that Akt directly regulates mTORC2. *Cell Metab.* 17, 1009–1020.
- 40 Imami, K., Sugiyama, N., Imamura, H., Wakabayashi, M., Tomita, M., Taniguchi, M., Ueno, T., Toi, M., and  
41 Ishihama, Y. (2012). Temporal profiling of lapatinib-suppressed phosphorylation signals in EGFR/HER2 pathways.  
42 *Mol. Cell. Proteomics MCP* 11, 1741–1757.
- 43 Johri, A., Chandra, A., and Beal, M.F. (2013). PGC-1 $\alpha$ , mitochondrial dysfunction, and Huntington’s disease. *Free*  
44 *Radic. Biol. Med.* 62, 37–46.
- 45 Jones, P., Côté, R.G., Martens, L., Quinn, A.F., Taylor, C.F., Derache, W., Hermjakob, H., and Apweiler, R. (2006).  
46 PRIDE: a public repository of protein and peptide identifications for the proteomics community. *Nucleic Acids Res.*  
47 34, D659–D663.
- 48 Ju, T.-C., Lin, Y.-S., and Chern, Y. (2012). Energy dysfunction in Huntington’s disease: insights from PGC-1 $\alpha$ ,  
49 AMPK, and CKB. *Cell. Mol. Life Sci. CMLS* 69, 4107–4120.
- 50 Jünger, M.A., and Aebersold, R. (2014). Mass spectrometry-driven phosphoproteomics: patterning the systems  
51 biology mosaic. *Wiley Interdiscip. Rev. Dev. Biol.* 3, 83–112.

- 1 Kay, C., Hayden, M.R., and Leavitt, B.R. (2017). Chapter 3 - Epidemiology of Huntington disease. In Handbook of  
2 Clinical Neurology, A.S. Feigin, and K.E. Anderson, eds. (Elsevier), pp. 31–46.
- 3 Kay, C., Fisher, E. R. & Hayden, M. R. (2014). Huntington's Disease Chapter 7 (eds Bates, G. P., Tabrizi, S. J. &  
4 Jones, L.) (Oxford University Press).
- 5 Keil, B. (1992). Specificity of Proteolysis (Springer-Verlag Berlin Heidelberg).
- 6 Kettenbach, A.N., Schweppe, D.K., Faherty, B.K., Pechenick, D., Pletnev, A.A., and Gerber, S.A. (2011).  
7 Quantitative phosphoproteomics identifies substrates and functional modules of Aurora and Polo-like kinase  
8 activities in mitotic cells. *Sci. Signal.* 4, rs5.
- 9 Kim, Y.C., and Hummer, G. (2008). Coarse-grained models for simulations of multiprotein complexes: application to  
10 ubiquitin binding. *J. Mol. Biol.* 375, 1416–1433.
- 11 Kim, M., Lee, H.S., LaForet, G., McIntyre, C., Martin, E.J., Chang, P., Kim, T.W., Williams, M., Reddy, P.H., Tagle,  
12 D., et al. (1999). Mutant huntingtin expression in clonal striatal cells: dissociation of inclusion formation and  
13 neuronal survival by caspase inhibition. *J. Neurosci. Off. J. Soc. Neurosci.* 19, 964–973.
- 14 Kim, Y.C., Tang, C., Clore, G.M., and Hummer, G. (2008). Replica exchange simulations of transient encounter  
15 complexes in protein–protein association. *Proc. Natl. Acad. Sci.* 105, 12855–12860.
- 16 Klammer, M., Kaminski, M., Zedler, A., Oppermann, F., Blencke, S., Marx, S., Müller, S., Tebbe, A., Godl, K., and  
17 Schaab, C. (2012). Phosphosignature predicts dasatinib response in non-small cell lung cancer. *Mol. Cell.*  
18 *Proteomics MCP* 11, 651–668.
- 19 Konarev, P.V., Volkov, V.V., Petoukhov, M.V., and Svergun, D.I. (2006). ATSAS 2.1, a program package for small-  
20 angle scattering data analysis. *J. Appl. Crystallogr.* 39, 277–286.
- 21 Kyte, J., and Doolittle, R.F. (1982). A simple method for displaying the hydrophobic character of a protein. *J. Mol.*  
22 *Biol.* 157, 105–132.
- 23 Li, W., Serpell, L.C., Carter, W.J., Rubinsztein, D.C., and Huntington, J.A. (2006). Expression and Characterization  
24 of Full-length Human Huntingtin, an Elongated HEAT Repeat Protein. *J. Biol. Chem.* 281, 15916–15922.
- 25 Luerman, G.C., Nguyen, C., Samaroo, H., Loos, P., Xi, H., Hurtado-Lorenzo, A., Needle, E., Stephen Noell, G.,  
26 Galatsis, P., Dunlop, J., et al. (2014). Phosphoproteomic evaluation of pharmacological inhibition of leucine-rich  
27 repeat kinase 2 reveals significant off-target effects of LRRK2-IN-1. *J. Neurochem.* 128, 561–576.
- 28 Luo, S., Vacher, C., Davies, J.E., and Rubinsztein, D.C. (2005). Cdk5 phosphorylation of huntingtin reduces its  
29 cleavage by caspases: implications for mutant huntingtin toxicity. *J. Cell Biol.* 169, 647–656.
- 30 Maiuri, T., Mocle, A.J., Hung, C.L., Xia, J., van Roon-Mom, W.M.C., and Truant, R. (2017). Huntingtin is a  
31 scaffolding protein in the ATM oxidative DNA damage response complex. *Hum. Mol. Genet.* 26, 395–406.
- 32 Marion, S., Urs, N.M., Peterson, S.M., Sotnikova, T.D., Beaulieu, J.-M., Gainetdinov, R.R., and Caron, M.G. (2014).  
33 Dopamine D2 receptor relies upon PPM/PP2C protein phosphatases to dephosphorylate huntingtin protein. *J. Biol.*  
34 *Chem.* 289, 11715–11724.
- 35 Mayya, V., Lundgren, D.H., Hwang, S.-I., Rezaul, K., Wu, L., Eng, J.K., Rodionov, V., and Han, D.K. (2009).  
36 Quantitative phosphoproteomic analysis of T cell receptor signaling reveals system-wide modulation of protein-  
37 protein interactions. *Sci. Signal.* 2, ra46.
- 38 Mellacheruvu, D., Wright, Z., Couzens, A.L., Lambert, J.-P., St-Denis, N., Li, T., Miteva, Y.V., Hauri, S., Sardi,  
39 M.E., Low, T.Y., et al. (2013). The CRAPome: a Contaminant Repository for Affinity Purification Mass Spectrometry  
40 Data. *Nat. Methods* 10, 730–736.
- 41 Mertins, P., Qiao, J.W., Patel, J., Udeshi, N.D., Clauser, K.R., Mani, D.R., Burgess, M.W., Gillette, M.A., Jaffe, J.D.,  
42 and Carr, S.A. (2013). Integrated proteomic analysis of post-translational modifications by serial enrichment. *Nat.*  
43 *Methods* 10, 634–637.
- 44 Mertins, P., Yang, F., Liu, T., Mani, D.R., Petyuk, V.A., Gillette, M.A., Clauser, K.R., Qiao, J.W., Gritsenko, M.A.,  
45 Moore, R.J., et al. (2014). Ischemia in tumors induces early and sustained phosphorylation changes in stress kinase  
46 pathways but does not affect global protein levels. *Mol. Cell. Proteomics MCP* 13, 1690–1704.
- 47 Mertins, P., Mani, D.R., Ruggles, K.V., Gillette, M.A., Clauser, K.R., Wang, P., Wang, X., Qiao, J.W., Cao, S.,  
48 Petralia, F., et al. (2016). Proteogenomics connects somatic mutations to signalling in breast cancer. *Nature* 534,  
49 55–62.
- 50 Meyer, J.G., Kim, S., Maltby, D.A., Ghassemian, M., Bandeira, N., and Komives, E.A. (2014). Expanding proteome  
51 coverage with orthogonal-specificity  $\alpha$ -lytic proteases. *Mol. Cell. Proteomics MCP* 13, 823–835.

- 1 Michalik, A., Kazantsev, A., and Van Broeckhoven, C. (2001). Method to introduce stable, expanded,  
2 polyglutamine-encoding CAG/CAA trinucleotide repeats into CAG repeat-containing genes. *BioTechniques* 31,  
3 250–252, 254.
- 4 Moritz, A., Li, Y., Guo, A., Villén, J., Wang, Y., MacNeill, J., Kornhauser, J., Sprott, K., Zhou, J., Possemato, A., et  
5 al. (2010). Akt-RSK-S6 kinase signaling networks activated by oncogenic receptor tyrosine kinases. *Sci. Signal.* 3,  
6 ra64.
- 7 Naia, L., Ferreira, I.L., Cunha-Oliveira, T., Duarte, A.I., Ribeiro, M., Rosenstock, T.R., Laço, M.N., Ribeiro, M.J.,  
8 Oliveira, C.R., Saudou, F., et al. (2015). Activation of IGF-1 and insulin signaling pathways ameliorate mitochondrial  
9 function and energy metabolism in Huntington's Disease human lymphoblasts. *Mol. Neurobiol.* 51, 331–348.
- 10 Nithianantharajah, J., and Hannan, A.J. (2013). Dysregulation of synaptic proteins, dendritic spine abnormalities  
11 and pathological plasticity of synapses as experience-dependent mediators of cognitive and psychiatric symptoms  
12 in Huntington's disease. *Neuroscience* 251, 66–74.
- 13 Olsen, J.V., Vermeulen, M., Santamaria, A., Kumar, C., Miller, M.L., Jensen, L.J., Gnad, F., Cox, J., Jensen, T.S.,  
14 Nigg, E.A., et al. (2010). Quantitative phosphoproteomics reveals widespread full phosphorylation site occupancy  
15 during mitosis. *Sci. Signal.* 3, ra3.
- 16 Pan, C., Olsen, J.V., Daub, H., and Mann, M. (2009). Global effects of kinase inhibitors on signaling networks  
17 revealed by quantitative phosphoproteomics. *Mol. Cell. Proteomics MCP* 8, 2796–2808.
- 18 Pardo, R., Colin, E., Régulier, E., Aebischer, P., Déglon, N., Humbert, S., and Saudou, F. (2006). Inhibition of  
19 calcineurin by FK506 protects against polyglutamine-huntingtin toxicity through an increase of huntingtin  
20 phosphorylation at S421. *J. Neurosci. Off. J. Soc. Neurosci.* 26, 1635–1645.
- 21 Peters, M.F., and Ross, C.A. (2001). Isolation of a 40-kDa Huntingtin-associated Protein. *J. Biol. Chem.* 276, 3188–  
22 3194.
- 23 Posey, A.E., Ruff, K.M., Harmon, T.S., Crick, S.L., Li, A., Diamond, M.I., and Pappu, R.V. (2018). Profilin reduces  
24 aggregation and phase separation of huntingtin N-terminal fragments by preferentially binding to soluble monomers  
25 and oligomers. *J. Biol. Chem.* 293, 3734–3746.
- 26 Rajmakers, R., Kraiczek, K., de Jong, A.P., Mohammed, S., and Heck, A.J.R. (2010). Exploring the human  
27 leukocyte phosphoproteome using a microfluidic reversed-phase-TiO<sub>2</sub>-reversed-phase high-performance liquid  
28 chromatography phosphochip coupled to a quadrupole time-of-flight mass spectrometer. *Anal. Chem.* 82, 824–832.
- 29 Rambo, R.P., and Tainer, J.A. (2013). Accurate assessment of mass, models and resolution by small-angle  
30 scattering. *Nature* 496, 477–481.
- 31 Rangone, H., Poizat, G., Troncoso, J., Ross, C.A., MacDonald, M.E., Saudou, F., and Humbert, S. (2004). The  
32 serum- and glucocorticoid-induced kinase SGK inhibits mutant huntingtin-induced toxicity by phosphorylating serine  
33 421 of huntingtin. *Eur. J. Neurosci.* 19, 273–279.
- 34 Ratovitski, T., Chighladze, E., Arbez, N., Boronina, T., Herbrich, S., Cole, R.N., and Ross, C.A. (2012). Huntingtin  
35 protein interactions altered by polyglutamine expansion as determined by quantitative proteomic analysis. *Cell*  
36 *Cycle Georget. Tex* 11, 2006–2021.
- 37 Ratovitski, T., O'Meally, R.N., Jiang, M., Chaerkady, R., Chighladze, E., Stewart, J.C., Wang, X., Arbez, N., Roby,  
38 E., Alexandris, A., et al. (2017). Post-Translational Modifications (PTMs), Identified on Endogenous Huntingtin,  
39 Cluster within Proteolytic Domains between HEAT Repeats. *J. Proteome Res.*
- 40 Reddy, P.H., and Shirendeb, U.P. (2012). Mutant huntingtin, abnormal mitochondrial dynamics, defective axonal  
41 transport of mitochondria, and selective synaptic degeneration in Huntington's disease. *Biochim. Biophys. Acta*  
42 1822, 101–110.
- 43 Rigbolt, K.T.G., Prokhorova, T.A., Akimov, V., Henningsen, J., Johansen, P.T., Kratchmarova, I., Kassem, M.,  
44 Mann, M., Olsen, J.V., and Blagoev, B. (2011). System-wide temporal characterization of the proteome and  
45 phosphoproteome of human embryonic stem cell differentiation. *Sci. Signal.* 4, rs3.
- 46 Rolland, D., Basrur, V., Conlon, K., Wolfe, T., Fermin, D., Nesvizhskii, A.I., Lim, M.S., and Elenitoba-Johnson,  
47 K.S.J. (2014). Global phosphoproteomic profiling reveals distinct signatures in B-cell non-Hodgkin lymphomas. *Am.*  
48 *J. Pathol.* 184, 1331–1342.
- 49 Ross, C.A., Aylward, E.H., Wild, E.J., Langbehn, D.R., Long, J.D., Warner, J.H., Scahill, R.I., Leavitt, B.R., Stout,  
50 J.C., Paulsen, J.S., et al. (2014). Huntington disease: natural history, biomarkers and prospects for therapeutics.  
51 *Nat. Rev. Neurol.* 10, 204–216.



- 1 Rui, Y.-N., Xu, Z., Patel, B., Chen, Z., Chen, D., Tito, A., David, G., Sun, Y., Stimming, E.F., Bellen, H.J., et al.  
2 (2015). Huntingtin functions as a scaffold for selective macroautophagy. *Nat. Cell Biol.* *17*, 262–275.
- 3 Saudou, F., and Humbert, S. (2016). The Biology of Huntingtin. *Neuron* *89*, 910–926.
- 4 Schilling, B., Gafni, J., Torcassi, C., Cong, X., Row, R.H., LaFevre-Bernt, M.A., Cusack, M.P., Ratovitski, T.,  
5 Hirschhorn, R., Ross, C.A., et al. (2006). Huntingtin Phosphorylation Sites Mapped by Mass Spectrometry  
6 MODULATION OF CLEAVAGE AND TOXICITY. *J. Biol. Chem.* *281*, 23686–23697.
- 7 Schneidman-Duhovny, D., Hammel, M., and Sali, A. (2010). FoXS: a web server for rapid computation and fitting of  
8 SAXS profiles. *Nucleic Acids Res.* *38*, W540–W544.
- 9 Schreiber, T.B., Mäusbacher, N., Kéri, G., Cox, J., and Daub, H. (2010). An integrated phosphoproteomics work  
10 flow reveals extensive network regulation in early lysophosphatidic acid signaling. *Mol. Cell. Proteomics MCP* *9*,  
11 1047–1062.
- 12 Schweppe, D.K., Rigas, J.R., and Gerber, S.A. (2013). Quantitative phosphoproteomic profiling of human non-small  
13 cell lung cancer tumors. *J. Proteomics* *91*, 286–296.
- 14 Senisterra, G.A., Markin, E., Yamazaki, K., Hui, R., Vedadi, M., and Awrey, D.E. (2006). Screening for ligands using  
15 a generic and high-throughput light-scattering-based assay. *J. Biomol. Screen.* *11*, 940–948.
- 16 Seong, I.S., Woda, J.M., Song, J.-J., Lloret, A., Abeyrathne, P.D., Woo, C.J., Gregory, G., Lee, J.-M., Wheeler,  
17 V.C., Walz, T., et al. (2010). Huntingtin facilitates polycomb repressive complex 2. *Hum. Mol. Genet.* *19*, 573–583.
- 18 Seredenina, T., and Luthi-Carter, R. (2012). What have we learned from gene expression profiles in Huntington's  
19 disease? *Neurobiol. Dis.* *45*, 83–98.
- 20 Sharma, K., D'Souza, R.C.J., Tyanova, S., Schaab, C., Wiśniewski, J.R., Cox, J., and Mann, M. (2014). Ultradeep  
21 human phosphoproteome reveals a distinct regulatory nature of Tyr and Ser/Thr-based signaling. *Cell Rep.* *8*,  
22 1583–1594.
- 23 Shirasaki, D.I., Greiner, E.R., Al-Ramahi, I., Gray, M., Boontheung, P., Geschwind, D.H., Botas, J., Coppola, G.,  
24 Horvath, S., Loo, J.A., et al. (2012). Network organization of the huntingtin proteomic interactome in mammalian  
25 brain. *Neuron* *75*, 41–57.
- 26 Stuart, S.A., Houel, S., Lee, T., Wang, N., Old, W.M., and Ahn, N.G. (2015). A Phosphoproteomic Comparison of B-  
27 RAFV600E and MKK1/2 Inhibitors in Melanoma Cells. *Mol. Cell. Proteomics MCP* *14*, 1599–1615.
- 28 Svergun, D., Barberato, C., and Koch, M.H.J. (1995). CRY SOL – a Program to Evaluate X-ray Solution Scattering  
29 of Biological Macromolecules from Atomic Coordinates. *J. Appl. Crystallogr.* *28*, 768–773.
- 30 Trevisiol, S., Ayoub, D., Lesur, A., Ancheva, L., Gallien, S., and Domon, B. (2016). The use of proteases  
31 complementary to trypsin to probe isoforms and modifications. *Proteomics* *16*, 715–728.
- 32 Vieweg, S., Ansaloni, A., Wang, Z.-M., Warner, J.B., and Lashuel, H.A. (2016). An Intein-based Strategy for the  
33 Production of Tag-free Huntingtin Exon 1 Proteins Enables New Insights into the Polyglutamine Dependence of  
34 Httex1 Aggregation and Fibril Formation. *J. Biol. Chem.* *291*, 12074–12086.
- 35 Vijayvargia, R., Eband, R., Leitner, A., Jung, T.-Y., Shin, B., Jung, R., Lloret, A., Singh Atwal, R., Lee, H., Lee, J.-  
36 M., et al. (2016). Huntingtin's spherical solenoid structure enables polyglutamine tract-dependent modulation of its  
37 structure and function. *ELife* *5*, e11184.
- 38 Wang, R., Ferraris, J.D., Izumi, Y., Dmitrieva, N., Ramkissoon, K., Wang, G., Gucek, M., and Burg, M.B. (2014).  
39 Global discovery of high-NaCl-induced changes of protein phosphorylation. *Am. J. Physiol. Cell Physiol.* *307*, C442-  
40 454.
- 41 Warby, S.C., Chan, E.Y., Metzler, M., Gan, L., Singaraja, R.R., Crocker, S.F., Robertson, H.A., and Hayden, M.R.  
42 (2005). Huntingtin phosphorylation on serine 421 is significantly reduced in the striatum and by polyglutamine  
43 expansion in vivo. *Hum. Mol. Genet.* *14*, 1569–1577.
- 44 Watkin, E.E., Arbez, N., Waldron-Roby, E., O'Meally, R., Ratovitski, T., Cole, R.N., and Ross, C.A. (2014).  
45 Phosphorylation of mutant huntingtin at serine 116 modulates neuronal toxicity. *PloS One* *9*, e88284.
- 46 Weber, C., Schreiber, T.B., and Daub, H. (2012). Dual phosphoproteomics and chemical proteomics analysis of  
47 erlotinib and gefitinib interference in acute myeloid leukemia cells. *J. Proteomics* *75*, 1343–1356.
- 48 Wiśniewski, J.R., Nagaraj, N., Zougman, A., Gnad, F., and Mann, M. (2010). Brain phosphoproteome obtained by a  
49 FASP-based method reveals plasma membrane protein topology. *J. Proteome Res.* *9*, 3280–3289.

- 1 Xia, Q., Cheng, D., Duong, D.M., Gearing, M., Lah, J.J., Levey, A.I., and Peng, J. (2008). Phosphoproteomic  
2 analysis of human brain by calcium phosphate precipitation and mass spectrometry. *J. Proteome Res.* 7, 2845–  
3 2851.
- 4 Xiao, K., Sun, J., Kim, J., Rajagopal, S., Zhai, B., Villén, J., Haas, W., Kovacs, J.J., Shukla, A.K., Hara, M.R., et al.  
5 (2010). Global phosphorylation analysis of beta-arrestin-mediated signaling downstream of a seven transmembrane  
6 receptor (7TMR). *Proc. Natl. Acad. Sci. U. S. A.* 107, 15299–15304.
- 7 Yi, T., Zhai, B., Yu, Y., Kiyotsugu, Y., Raschle, T., Etzkorn, M., Seo, H.-C., Nagiec, M., Luna, R.E., Reinherz, E.L.,  
8 et al. (2014). Quantitative phosphoproteomic analysis reveals system-wide signaling pathways downstream of SDF-  
9 1/CXCR4 in breast cancer stem cells. *Proc. Natl. Acad. Sci. U. S. A.* 111, E2182-2190.
- 10 Zahedi, R.P., Lewandrowski, U., Wiesner, J., Wortelkamp, S., Moebius, J., Schütz, C., Walter, U., Gambaryan, S.,  
11 and Sickmann, A. (2008). Phosphoproteome of resting human platelets. *J. Proteome Res.* 7, 526–534.
- 12 Zala, D., Colin, E., Rangone, H., Liot, G., Humbert, S., and Saudou, F. (2008). Phosphorylation of mutant huntingtin  
13 at S421 restores anterograde and retrograde transport in neurons. *Hum. Mol. Genet.* 17, 3837–3846.
- 14 Zheng, Z., and Diamond, M.I. (2012). Huntington disease and the huntingtin protein. *Prog. Mol. Biol. Transl. Sci.*  
15 107, 189–214.
- 16 Zhou, H., Di Palma, S., Preisinger, C., Peng, M., Polat, A.N., Heck, A.J.R., and Mohammed, S. (2013). Toward a  
17 comprehensive characterization of a human cancer cell phosphoproteome. *J. Proteome Res.* 12, 260–271.
- 18 (1993). A novel gene containing a trinucleotide repeat that is expanded and unstable on Huntington's disease  
19 chromosomes. The Huntington's Disease Collaborative Research Group. *Cell* 72, 971–983.
