# Supplementary material for: Design and characterisation of mutant and wild-type huntingtin proteins produced from a toolkit of scalable eukaryotic expression systems
Source: bioRxiv or medRxiv preprint supplement (doi:10.1101/492215), 2019-02-05

## SUPPLEMENTARY INFORMATION

### **Design and characterisation of mutant and wild-type huntingtin proteins produced from a toolkit of scalable eukaryotic expression systems**

Rachel J. Harding<sup>1\*</sup>, Peter Loppnau<sup>1</sup>, Suzanne Ackloo<sup>1</sup>, Alexander Lemak<sup>2</sup>, Ashley Hutchinson<sup>1</sup>, Brittany Hunt<sup>1</sup>, Alex S. Holehouse<sup>3</sup>, Jolene C. Ho<sup>1</sup>, Lixin Fan<sup>4</sup>, Leticia Toledo-Sherman<sup>5</sup>, Alma Seitova<sup>1</sup>, Cheryl H. Arrowsmith<sup>1,2\*</sup>

<sup>1</sup>Structural Genomics Consortium, University of Toronto, MaRS South Tower, 101 College Street, Toronto, Ontario M5G 1L7, Canada.

<sup>2</sup>Princess Margaret Cancer Centre and Department of Medical Biophysics, University of Toronto, Toronto, Ontario M5G 1L7, Canada

<sup>3</sup>Department of Biomedical Engineering and Center for Biological Systems Engineering, Washington University in Saint Louis, Saint Louis, Missouri 63130, USA

<sup>4</sup>Center for Cancer Research, National Cancer Institute, Advanced Technology Research Facility, Frederick, MD 21701, USA

<sup>5</sup>CHDI Foundation, 6080 Center Drive, Suite 700, Los Angeles, CA 90045, USA

#### **\*Corresponding authors:**

Rachel J. Harding  
Tel.: 416-946-3795  
Email: [Rachel.harding@utoronto.ca](mailto:Rachel.harding@utoronto.ca)

Cheryl Arrowsmith  
Tel.: 416-946-0881  
E-mail: [Cheryl.Arrowsmith@uhnresearch.ca](mailto:Cheryl.Arrowsmith@uhnresearch.ca)

**Table S1.** Database search results for HTT<sup>1-3144</sup> Q23 expressed in EXP1293F cells. Of the peptides which do not correspond to HTT protein, most either have very high scores in the CRAPome (Mellacheruvu et al., 2013), suggesting that these are non-specific contaminants of the co-immunoprecipitation step, not true HTT interactors, or they are very low abundance.

| Protein Accession | Total no. spectra | No. unique peptides | Protein Accession | Total no. spectra | No. unique peptides | Protein Accession | Total no. spectra | No. unique peptides | Protein Accession | Total no. spectra | No. unique peptides |
|-------------------|-------------------|---------------------|-------------------|-------------------|---------------------|-------------------|-------------------|---------------------|-------------------|-------------------|---------------------|
| P42858 HD         | 7681              | 1150                | P62805 H4         | 12                | 2                   | P09131 P3         | 5                 | 1                   | Q7RTP6 MICA3      | 2                 | 1                   |
| Q13748 TBA3C      | 175               | 29                  | Q14568 HS902      | 12                | 5                   | Q13576 IQGA2      | 5                 | 2                   | Q86Y39 INDUAB     | 2                 | 1                   |
| Q13885 TBB2A      | 111               | 26                  | Q5CZC0 FSP2       | 12                | 5                   | Q15746 MYLK       | 5                 | 1                   | Q81WK6 AGRA3      | 2                 | 1                   |
| Q9BVA1 TBB2B      | 111               | 26                  | Q5S007 LRRK2      | 12                | 2                   | Q86V8 IRTTN       | 5                 | 3                   | Q81YE0 CC146      | 2                 | 1                   |
| P07900 HS90A      | 110               | 24                  | Q7Z5J8 ANKAR      | 12                | 3                   | Q8NBX0 SCFDL      | 5                 | 2                   | Q8N2C7 UNC80      | 2                 | 1                   |
| Q6PEY2 TBA3E      | 64                | 13                  | Q8TE73 DYH5       | 12                | 6                   | Q8T2D6 CHD6       | 5                 | 2                   | Q8N4X5 AF1L2      | 2                 | 1                   |
| Q9BIE2 TMPSD      | 56                | 7                   | Q96JB1 DYH8       | 12                | 4                   | Q9ULT8 HECD1      | 5                 | 3                   | Q8N5H7 SH2D3      | 2                 | 1                   |
| Q9NY65 TBA8       | 54                | 9                   | Q96PX9 PKH4B      | 12                | 2                   | Q00189 AP4M1      | 4                 | 1                   | Q8TBP6 S2540      | 2                 | 1                   |
| Q71U36 TBA1A      | 51                | 12                  | Q9UDT6 CLIP2      | 12                | 3                   | Q95613 PCNT       | 4                 | 2                   | Q8WXX0 DYH7       | 2                 | 1                   |
| P04350 TBB4A      | 48                | 12                  | Q60890 OPHN1      | 11                | 3                   | P35475 IDUA       | 4                 | 1                   | Q369F2 NKD2       | 2                 | 1                   |
| P60709 ACTB       | 45                | 13                  | Q02224 CENPE      | 11                | 3                   | P55072 TERA       | 4                 | 1                   | Q96JM4 LR1Q1      | 2                 | 1                   |
| P11142 HSP7C      | 44                | 12                  | Q6ZQ06 WDR87      | 11                | 2                   | Q14997 PSME4      | 4                 | 2                   | Q96KP1 EXOC2      | 2                 | 2                   |
| P63261 ACTG       | 44                | 13                  | Q7Z333 SETX       | 11                | 4                   | Q15569 TESK1      | 4                 | 1                   | Q96RT1 ERBIN      | 2                 | 2                   |
| P23396 RS3        | 43                | 11                  | Q86UQ4 ABCAD      | 11                | 4                   | Q15643 TRIPB      | 4                 | 1                   | Q9BXT5 ITEX15     | 2                 | 1                   |
| P54652 HSP72      | 43                | 12                  | Q9Y4F4 TGRM1      | 11                | 3                   | Q81Y17 PLPL6      | 4                 | 1                   | Q9C099 LRCC1      | 2                 | 2                   |
| P15880 RS2        | 38                | 11                  | P21817 RYSR1      | 10                | 2                   | Q8N2E2 VWDE       | 4                 | 2                   | Q9H649 NSUN3      | 2                 | 1                   |
| Q13509 TBB3       | 36                | 8                   | Q12955 ANK3       | 10                | 5                   | Q8N3K9 CMYA5      | 4                 | 1                   | Q9N22 EMIL3       | 2                 | 2                   |
| tr A0A0B4J269     | 32                | 7                   | Q1XH10 SKDA1      | 10                | 2                   | Q8NH9 ATLA2       | 4                 | 1                   | Q9NY24 SIGL8      | 2                 | 1                   |
| P0DMV8 HS71A      | 31                | 9                   | Q5T1B0 AXDN1      | 10                | 2                   | Q8TXE9 IPO4       | 4                 | 2                   | Q9P219 DAPLE      | 2                 | 2                   |
| P0DMV9 HS71B      | 31                | 9                   | Q86U86 PB1        | 10                | 3                   | Q93008 LUSP9X     | 4                 | 2                   | Q9U147 CTNA3      | 2                 | 1                   |
| P07437 TBB5       | 30                | 7                   | Q86V13 IQGA3      | 10                | 3                   | Q9BXS5 AP1M1      | 4                 | 1                   | Q9Y4B5 MTCL1      | 2                 | 1                   |
| Q9BWH6 RPAP1      | 27                | 4                   | Q8IZD9 DOCK3      | 10                | 3                   | Q9H9L3 I20L2      | 4                 | 1                   | Q9Y4D8 HECD4      | 2                 | 1                   |
| Q5VYK3 ECM29      | 26                | 6                   | Q13136 LIPA1      | 9                 | 4                   | Q9HBW0 LPAR2      | 4                 | 1                   | tr A0A075B6H5     | 2                 | 1                   |
| Q8WXG9 GPR98      | 26                | 4                   | Q15751 HERC1      | 9                 | 3                   | Q9HCF6 TRPM3      | 4                 | 1                   | tr K7EMT4 K7EMT4  | 2                 | 1                   |
| Q562R1 ACTBL      | 24                | 7                   | Q6PI48 SYDM       | 9                 | 3                   | Q9P281 BAHC1      | 4                 | 2                   | AUGR9 XIRP2       | 1                 | 1                   |
| Q9UPN3 MACF1      | 23                | 4                   | Q9HBJ7 UBP29      | 9                 | 3                   | Q9UM54 MYO6       | 4                 | 2                   | Q43918 AIRE       | 1                 | 1                   |
| A6NKT7 RGPD3      | 22                | 6                   | Q9PDL2 MARK1      | 9                 | 1                   | Q9Y6Q5 AP1M2      | 4                 | 1                   | O60333 KIF1B      | 1                 | 1                   |
| P17066 HSP76      | 21                | 7                   | Q9P217 ZSWM5      | 9                 | 3                   | A6NKB5 PCX2       | 3                 | 2                   | O60673 REV3L      | 1                 | 1                   |
| Q03001 DYST       | 21                | 3                   | tr Q5TEC6 Q5TEC6  | 9                 | 3                   | Q94991 SLIK5      | 3                 | 2                   | Q75151 PHF2       | 1                 | 1                   |
| P08238 HS90B      | 20                | 7                   | O15078 CE290      | 8                 | 3                   | P02786 TFR1       | 3                 | 1                   | P01137 TGFβ1      | 1                 | 1                   |
| Q9BQG0 MBB1A      | 20                | 5                   | O60391 NMD3B      | 8                 | 2                   | P14625 ENPL       | 3                 | 1                   | P08779 K1C16      | 1                 | 1                   |
| P11021 GRP78      | 19                | 6                   | O75534 CSDE1      | 8                 | 2                   | P25054 APC        | 3                 | 2                   | P19012 K1C15      | 1                 | 1                   |
| Q58FG1 HS90A      | 19                | 4                   | P49137 MAPK2      | 8                 | 2                   | P49759 CLK1       | 3                 | 1                   | P22492 H1T        | 1                 | 1                   |
| Q8NET8 TRPV3      | 19                | 3                   | P62269 RS18       | 8                 | 2                   | P98161 PKD1       | 3                 | 1                   | P38935 SMBP2      | 1                 | 1                   |
| O60814 H2B1K      | 18                | 3                   | Q16695 H31T       | 8                 | 2                   | Q03169 TNAP2      | 3                 | 2                   | P41218 MINDA      | 1                 | 1                   |
| P06899 H2B1J      | 18                | 3                   | Q8NCG5 CHST4      | 8                 | 2                   | Q14674 ESPL1      | 3                 | 1                   | P42345 MTOR       | 1                 | 1                   |
| P23527 H2B1O      | 18                | 3                   | Q8WUAW TBB2A      | 8                 | 2                   | Q15326 ZMY11      | 3                 | 2                   | P50548 ERF        | 1                 | 1                   |
| P33778 H2B1B      | 18                | 3                   | Q9NRC6 SPTN5      | 8                 | 2                   | Q6A139 BICRL      | 3                 | 1                   | P80192 M3K9       | 1                 | 1                   |
| P57053 H2BFS      | 18                | 3                   | Q9NRD9 DUOX1      | 8                 | 2                   | Q6PL18 ATAD2      | 3                 | 1                   | Q02218 ODO1       | 1                 | 1                   |
| P58876 H2B1D      | 18                | 3                   | O15381 NVL        | 7                 | 2                   | Q6UWY2 PRS57      | 3                 | 1                   | Q03164 KMT2A      | 1                 | 1                   |
| P62807 H2B1C      | 18                | 3                   | Q15021 CND1       | 7                 | 2                   | Q72627 HUWE1      | 3                 | 1                   | Q06141 REG3A      | 1                 | 1                   |
| Q16778 H2B2E      | 18                | 3                   | Q5T9S5 CCD18      | 7                 | 2                   | Q86XX4 FRAS1      | 3                 | 2                   | Q13395 TARB1      | 1                 | 1                   |
| Q5QNW6 H2B2F      | 18                | 3                   | Q5VZP5 DUS27      | 7                 | 2                   | Q92824 PCSK5      | 3                 | 2                   | Q14315 FLNC       | 1                 | 1                   |
| Q8N257 H2B3B      | 18                | 3                   | Q6WRI0 IGS10      | 7                 | 2                   | Q9BWT7 CAR10      | 3                 | 2                   | Q14690 RRP5       | 1                 | 1                   |
| Q93079 H2B1H      | 18                | 3                   | Q709C8 VP13C      | 7                 | 2                   | Q9BWU0 NADAP      | 3                 | 1                   | Q2Y0W8 SA48       | 1                 | 1                   |
| Q99877 H2B1N      | 18                | 3                   | Q96JC1 VPS39      | 7                 | 2                   | Q9H6E4 CC134      | 3                 | 2                   | Q3V6T2 GRDN       | 1                 | 1                   |
| Q99879 H2B1M      | 18                | 3                   | Q9BSJ2 GCP2       | 7                 | 2                   | Q9HB40 RISC       | 3                 | 2                   | Q5TGY3 AHDC1      | 1                 | 1                   |
| Q99880 H2B1L      | 18                | 3                   | Q9P1Y6 PHRF1      | 7                 | 2                   | Q9HCE0 EPG5       | 3                 | 1                   | Q6P1M3 L2GL2      | 1                 | 1                   |
| Q12931 TRAP1      | 16                | 5                   | Q9P1Z3 HCN3       | 7                 | 2                   | Q9NR09 BIRC6      | 3                 | 2                   | Q6P1S2 CC033      | 1                 | 1                   |
| Q81VF2 AHNK2      | 16                | 1                   | Q9P2E5 CHPF2      | 7                 | 2                   | Q9NU22 MDN1       | 3                 | 2                   | Q6U841 SA410      | 1                 | 1                   |
| O14647 CHD2       | 15                | 2                   | Q9UL51 HCN2       | 7                 | 2                   | Q9NUT2 ABC8       | 3                 | 2                   | Q6YHK3 CD109      | 1                 | 1                   |
| P04908 H2A1B      | 14                | 4                   | Q9Y3Q4 HCN4       | 7                 | 2                   | Q9UK17 KCN3       | 3                 | 2                   | Q6ZNV6 GBP6       | 1                 | 1                   |
| P0C0S5 H2AZ       | 14                | 4                   | A6NE52 WDR97      | 6                 | 1                   | Q9UNA1 RHG26      | 3                 | 1                   | Q7Z2D5 PLPR4      | 1                 | 1                   |
| P0C0S8 H2A1       | 14                | 4                   | O43314 VIP2       | 6                 | 1                   | Q9Y2H2 SAC2       | 3                 | 1                   | Q7Z417 NUFP2      | 1                 | 1                   |
| P16104 H2AX       | 14                | 4                   | O43896 KIF1C      | 6                 | 2                   | Q9Y462 ZN711      | 3                 | 1                   | Q7Z456 KI21A      | 1                 | 1                   |
| P20671 H2A1D      | 14                | 4                   | P05164 PERM       | 6                 | 2                   | O15230 LAMA5      | 2                 | 1                   | Q86XH1 IQCA4      | 1                 | 1                   |
| P34931 HS71L      | 14                | 5                   | P08670 VIME       | 6                 | 1                   | O75665 OFD1       | 2                 | 2                   | Q8NDM7 CFA43      | 1                 | 1                   |
| Q16777 H2A2C      | 14                | 4                   | P19823 TIH2       | 6                 | 2                   | O95153 RIMB1      | 2                 | 1                   | Q8NEN0 ARMC2      | 1                 | 1                   |
| Q6F113 H2A2A      | 14                | 4                   | Q13608 PEX6       | 6                 | 1                   | P14136 GFAP       | 2                 | 1                   | Q8NF91 SYNE1      | 1                 | 1                   |
| Q71U19 H2AV       | 14                | 4                   | Q13683 ITA7       | 6                 | 1                   | P18124 RL7        | 2                 | 1                   | Q8NI77 KI18A      | 1                 | 1                   |
| Q7L7L0 H2A3       | 14                | 4                   | Q2LD37 K1109      | 6                 | 1                   | P23458 JAK1       | 2                 | 1                   | Q8TF72 SHRM3      | 1                 | 1                   |
| Q93077 H2A1C      | 14                | 4                   | Q5JV73 FRPD3      | 6                 | 3                   | P42704 LPPRC      | 2                 | 1                   | Q96M83 CCDC7      | 1                 | 1                   |
| Q96KK5 H2A1H      | 14                | 4                   | Q5JWR5 DOP1       | 6                 | 1                   | P46100 ATR        | 2                 | 1                   | Q9H2X0 CHRD       | 1                 | 1                   |
| Q96QV6 H2A1A      | 14                | 4                   | Q6N069 NAA16      | 6                 | 2                   | P61163 ACTZ       | 2                 | 2                   | Q9H799 CE042      | 1                 | 1                   |
| Q99878 H2A1J      | 14                | 4                   | Q86XA9 HTR5A      | 6                 | 1                   | P68104 EF1A1      | 2                 | 1                   | Q9HBB8 CDHR5      | 1                 | 1                   |
| Q9BTM1 H2AJ       | 14                | 4                   | Q8NCM8 DYHC2      | 6                 | 1                   | Q03112 EV11       | 2                 | 1                   | Q9HBG6 IF122      | 1                 | 1                   |
| Q9H2M9 IRBGR      | 14                | 2                   | Q8TD57 DYH3       | 6                 | 2                   | Q05639 EF1A2      | 2                 | 1                   | Q9P1Y5 CAMP3      | 1                 | 1                   |
| Q9NY93 DDX56      | 14                | 3                   | Q92997 DVL3       | 6                 | 1                   | Q0VDD8 DYH14      | 2                 | 1                   | Q9ULV0 MYO5B      | 1                 | 1                   |
| Q9P225 DYH2       | 14                | 4                   | Q96A08 H2B1A      | 6                 | 1                   | Q13315 ATM        | 2                 | 2                   | Q9Y5B0 CTDP1      | 1                 | 1                   |
| Q9UKN7 MYO15      | 14                | 3                   | Q96QT4 TRPM7      | 6                 | 1                   | Q14999 CUL7       | 2                 | 1                   | Q9Y5I0 PCDAD      | 1                 | 1                   |
| Q58FF7 H90B3      | 13                | 5                   | Q99966 AKAP9      | 6                 | 3                   | Q14D04 IMELT      | 2                 | 1                   | Q9Y5Y9 SCNAA      | 1                 | 1                   |
| Q81VL1 NAV2       | 13                | 3                   | Q9HCK8 CHD8       | 6                 | 3                   | Q5VTE0 EF1A3      | 2                 | 1                   | Q9Y618 NCOR2      | 1                 | 1                   |
| Q9H853 TBA4B      | 13                | 3                   | Q9NYC9 DYH9       | 6                 | 1                   | Q6V017 FAT4       | 2                 | 2                   | Q9Y6F7 CDY2       | 1                 | 1                   |
| P02549 SPTA1      | 12                | 2                   | Q9P2D1 CHD7       | 6                 | 3                   | Q6ZRO8 DYH12      | 2                 | 1                   |                   |                   |                     |

**Figure S1** – FLAG-resin purified C-terminally FLAG-tagged HTT samples derived from EXPI293 expression, either by transient transfection or baculoviral transduction in EXPI293 cells or baculoviral transduction in Sf9 cells, were subject to Western Blot analysis with ab109115 which binds an epitope at amino acids 1-100.

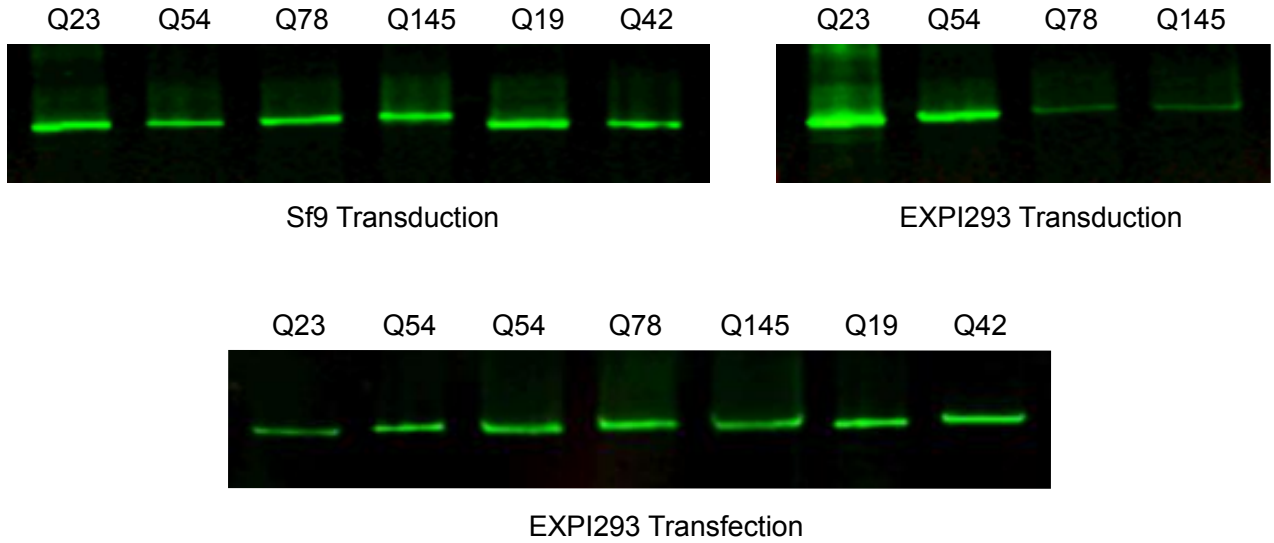

**Figure S2.** Sequence coverage maps of Sf9 HTT<sup>1-3144</sup> Q23 for A) five enzymes combined (97%) and B) trypsin and lysargiNase combined (66%) as obtained from bottom-up proteomics experiments.

A)

```

1  MATLEKLMKA FESLKSFQQQ QQQQQQQQQQ QQQQQQQQPP PPPPPPPPPP LPQPPPAQP LLPQPQPPP PPPPPPPPAV AEEPLHRPKK ELSATKKDRV
101 NHCITICENI VAQSVRNSE FQKLLGTAME LFLCSDDAE SDVRMVADEC LNKVIKALMD SNLPRLQLEL YKEIKKNGAP RSLRAALWRF AELAHVLRPQ
201 KCRPYLVNLL PCLTRTSKRP EESVQETLAA AVPKIMASFG NFANDNEIKV LLKAFIANLK SSSPTIRRTA AGSAVSICQH SRRTYQYFYSW LLNVLLGLLV
301 PVEDEHSTLL ILGVLTLIRY LVPLLQQQVK DTSLKGSFGV TRKEMEVSPP AEQLVQVYEL TLHHTQHQDH NVVTGALELL QQLFRTPPPE LQTLTAVGG
401 IGQTLAAKEE SGGRSRSGSI VELIAGGSS CSPVLSRKQK GKVLGEEEA LEDDSESRSD VSSALTASV KDEISGELAA SSGVSTPGSA GHDIIITEQPR
501 SQHTLQADSV DLASCDLTSS ATDGDEEDIL SHSSSQVSAV PSDPAMDLDN GTQASSPISD SSQTTEGPD SAVTPSDSSE IVLDGTDNQY LGLQIQQPQD
601 EDEEATGILP DEASEAFRNS SMALQQAHLL KNMSHCRQPS DSSVDKFLVR DEATEPGDQE NKPCRIRKGI QSTDDDSAP LVHCVRLLSA SFLLTGGKNV
701 LVPDRDVRVS VKALALSCVG AVALHPESF FSKLYKVLDP TTEYPPEQYV SDILNYIDHG DPQVGRATAI LCGTLICISIL SRSRPHVGDW MGTIRTLTGL
801 TFLADCIPL LRKTLKDESS VTCKLACTAV RNCVMSLCS SYSELGLQI IDVLTIRNSS YWLVRTELE TLAEIDFRLV SFLEAKAENL HRGAHYHTG
901 LKIQERVLNN VVIHLLGDED PRVRHVAAS LIRLVPKLEY KCDQGGADPV VAVARDQSSV YLKLIMHETQ PPSHFSVSTI TRIYRGYNLL PSITDVTMEN
1001 NLSRVIAAVS HELITSTTRA LTFGCEALC LLSTAFFVCI WSLGWHGCVF PLSASDESRC SCTVGMATMI LTLSSAWFP LLSAHDQDAL ILAGNLLAAS
1101 APKSLRSSWA SEEEANPAAT QKEEVPFALG DRALVPMVEQ LFSHLLKVIN ICAHVLDVA PGPAIKAALP SLTNPPSLSP IRRKKEKEP GEQASVPLSP
1201 KKGSEASAS RQSDTSGPVT TSKSSLSGFS YHLSYKIKH DVLTDLQNST EKFGGLRGA LDVLSQILEL ATLQDIDGCV EEILGLKSC
1301 FSREPMMATV CVQQLLTKLF GTNLASQFDG LSSNPSKSG RAQRGSSSV RPLGHYCFM APYTHFTQAL ADASLRNMVQ AEQENDTSGW FDLVQKVSQ
1401 LKTNLTSVTK NRADKNAHN HIRLFEPLVI KALKQYTTT CVLQKQVLD LLAQLVQLVR NYCLLSDQV FIGFVLKQFE YIEVGQFRS EAIIPNIFFF
1501 LVLLSYERYH SKQIIGIPKI IQLCDGIMAS GRKAVTHAIP ALQPIVHDFL VLRGTNKADA GKELETQKEV VVSMLLRLIQ YHQVLEMFIL VLQCKHENE
1601 DKWRLSRQI ADIILPMLAK QQMHDISHA LGVINTLFEI LAPSSLRPVD MLLRSMFVTP NTMASVSTVQ LWSIGLAIL RVLISQSTED IVLSRIQELS
1701 FSPYLISCTV INLRDGDST STLEEHSSEK QIKNLPEETF SRFLQLVGI LLEDIVTKQL KVMSEQQHT FYCQELGTL MCLIHIFKSG MFRITAAAT
1801 RIFRSDGCGG SFYTLDSLNL RARSMITTHP ALVLLWCQIL LLVNHDTYRW WAEVQQTPKR HSLSTKLLS PQMSGEEEDS DLAAKLGMCN REIVRRGALI
1901 LFCDYVCQNL HDSEHLTWLI VNIHQDLISL SHEPPVQDFI SAVHRNSAAS GLFIQAIQSR CENLSTPTML KKTLCLEGI HLSQSGAVLT LYVDRLLCTP
2001 FRVLARMVDI LACRVMELL AANLQSSMAQ LPMELNRIQ EYLQSSGLAQ RHQRYSLLD RFRLSTMQDS LSPSPVSSH PLDGDGHVSL ETVSPDKDNY
2101 VHLVKSQCWT RSDSALLEGA ELVNRIPAED MNAFMNNEF NLSLLAPCLS LGMSEISGGQ KSALFEAARE VTLARVSGTV QQLPAVHVHF QPELPAEPAA
2201 YWKLNDLFG DAALYQSLPT LARALAQYLV VVSKLPSHLH LPEKEKDIV KFVVATLEAL SWHLIHEQIP LSLDLQAGLD CCLALQLPG LWSVVSSTEF
2301 VTHACSLIYC VHFILEAVAV QPGEQLLSE RRTNTPKAYS EEEEEVDPT QNPKYITAC EMVAEMVESL QSVLALGHRK NSGVPAFLTP LRRNIISLA
2401 RLPLVNSYTR VVPLVWKLW SPKPGDGTG APPEIPVEFL QEVEFKKEFI YRINTLWTS RTQFEETWAT LLGVLVTQPL VMEQESPE EDETRTQINV
2501 LAVQAITSIV LSAMTPVAV NPAVSCLEQQ PRNKPLKALD TRFGRKLSII RGIVEQEIQ MVSRENAT HHLYQAWDPV PSLSPATGA LISHEKLLQ
2601 INPERELGSM SYKLQVSIH SVWLGNSITP LREEWDEEE EEEADAPAPS SPPTSPVNSR KHRAGVDIHS CSQFLLELYS RWLPSSSAR RFPAILISEV
2701 VRSLLVSDI FTERNQFELM VYVTLTELRV HPESEDLAQ YLVPATCKAA AVLGMDKAVA EPVSRLLST LRSSHLPSPV GALHGVLYVL ECDLDDTAK
2801 QLIPVISDYL LSNLKGIAHC VNIHQHVL VMCATAFYLI ENYPLDVGPE FSASIIQMGV VMLSGSEEST PSIIYHCAIR GLERLLSEQ LSRIDAESIV
2901 KLSVDRNVH SPHRAMAALG LMLTCMYTGK EKVSPGRSTD PNPAPDSES VIVAMERSV LFDRIKGFPP CEARVVARIL PQFLDDFFPP QDIMNKVIGE
3001 FLSNQQYPQ FMATVYKVF QTLHSTGQSS MVRDWMVLSL SNFTQAPVA MATWSLSCFF VSASTSPWA AILPHVISRM GKLEQVDVNL FCLVATDFYR
3101 HQIEEELDRR AFQSVLEVA APGSPYHRL TCLRNVHKVT TC

```

B)

```

1  MATLEKLMKA FESLKSFQQQ QQQQQQQQQQ QQQQQQQQPP PPPPPPPPPP LPQPPPAQP LLPQPQPPP PPPPPPPPAV AEEPLHRPKK ELSATKKDRV
101 NHCITICENI VAQSVRNSE FQKLLGTAME LFLCSDDAE SDVRMVADEC LNKVIKALMD SNLPRLQLEL YKEIKKNGAP RSLRAALWRF AELAHVLRPQ
201 KCRPYLVNLL PCLTRTSKRP EESVQETLAA AVPKIMASFG NFANDNEIKV LLKAFIANLK SSSPTIRRTA AGSAVSICQH SRRTYQYFYSW LLNVLLGLLV
301 PVEDEHSTLL ILGVLTLIRY LVPLLQQQVK DTSLKGSFGV TRKEMEVSPP AEQLVQVYEL TLHHTQHQDH NVVTGALELL QQLFRTPPPE LQTLTAVGG
401 IGQTLAAKEE SGGRSRSGSI VELIAGGSS CSPVLSRKQK GKVLGEEEA LEDDSESRSD VSSALTASV KDEISGELAA SSGVSTPGSA GHDIIITEQPR
501 SQHTLQADSV DLASCDLTSS ATDGDEEDIL SHSSSQVSAV PSDPAMDLDN GTQASSPISD SSQTTEGPD SAVTPSDSSE IVLDGTDNQY LGLQIQQPQD
601 EDEEATGILP DEASEAFRNS SMALQQAHLL KNMSHCRQPS DSSVDKFLVR DEATEPGDQE NKPCRIRKGI QSTDDDSAP LVHCVRLLSA SFLLTGGKNV
701 LVPDRDVRVS VKALALSCVG AVALHPESF FSKLYKVLDP TTEYPPEQYV SDILNYIDHG DPQVGRATAI LCGTLICISIL SRSRPHVGDW MGTIRTLTGL
801 TFLADCIPL LRKTLKDESS VTCKLACTAV RNCVMSLCS SYSELGLQI IDVLTIRNSS YWLVRTELE TLAEIDFRLV SFLEAKAENL HRGAHYHTG
901 LKIQERVLNN VVIHLLGDED PRVRHVAAS LIRLVPKLEY KCDQGGADPV VAVARDQSSV YLKLIMHETQ PPSHFSVSTI TRIYRGYNLL PSITDVTMEN
1001 NLSRVIAAVS HELITSTTRA LTFGCEALC LLSTAFFVCI WSLGWHGCVF PLSASDESRC SCTVGMATMI LTLSSAWFP LLSAHDQDAL ILAGNLLAAS
1101 APKSLRSSWA SEEEANPAAT QKEEVPFALG DRALVPMVEQ LFSHLLKVIN ICAHVLDVA PGPAIKAALP SLTNPPSLSP IRRKKEKEP GEQASVPLSP
1201 KKGSEASAS RQSDTSGPVT TSKSSLSGFS YHLSYKIKH DVLTDLQNST EKFGGLRGA LDVLSQILEL ATLQDIDGCV EEILGLKSC
1301 FSREPMMATV CVQQLLTKLF GTNLASQFDG LSSNPSKSG RAQRGSSSV RPLGHYCFM APYTHFTQAL ADASLRNMVQ AEQENDTSGW FDLVQKVSQ
1401 LKTNLTSVTK NRADKNAHN HIRLFEPLVI KALKQYTTT CVLQKQVLD LLAQLVQLVR NYCLLSDQV FIGFVLKQFE YIEVGQFRS EAIIPNIFFF
1501 LVLLSYERYH SKQIIGIPKI IQLCDGIMAS GRKAVTHAIP ALQPIVHDFL VLRGTNKADA GKELETQKEV VVSMLLRLIQ YHQVLEMFIL VLQCKHENE
1601 DKWRLSRQI ADIILPMLAK QQMHDISHA LGVINTLFEI LAPSSLRPVD MLLRSMFVTP NTMASVSTVQ LWSIGLAIL RVLISQSTED IVLSRIQELS
1701 FSPYLISCTV INLRDGDST STLEEHSSEK QIKNLPEETF SRFLQLVGI LLEDIVTKQL KVMSEQQHT FYCQELGTL MCLIHIFKSG MFRITAAAT
1801 RIFRSDGCGG SFYTLDSLNL RARSMITTHP ALVLLWCQIL LLVNHDTYRW WAEVQQTPKR HSLSTKLLS PQMSGEEEDS DLAAKLGMCN REIVRRGALI
1901 LFCDYVCQNL HDSEHLTWLI VNIHQDLISL SHEPPVQDFI SAVHRNSAAS GLFIQAIQSR CENLSTPTML KKTLCLEGI HLSQSGAVLT LYVDRLLCTP
2001 FRVLARMVDI LACRVMELL AANLQSSMAQ LPMELNRIQ EYLQSSGLAQ RHQRYSLLD RFRLSTMQDS LSPSPVSSH PLDGDGHVSL ETVSPDKDNY
2101 VHLVKSQCWT RSDSALLEGA ELVNRIPAED MNAFMNNEF NLSLLAPCLS LGMSEISGGQ KSALFEAARE VTLARVSGTV QQLPAVHVHF QPELPAEPAA
2201 YWKLNDLFG DAALYQSLPT LARALAQYLV VVSKLPSHLH LPEKEKDIV KFVVATLEAL SWHLIHEQIP LSLDLQAGLD CCLALQLPG LWSVVSSTEF
2301 VTHACSLIYC VHFILEAVAV QPGEQLLSE RRTNTPKAYS EEEEEVDPT QNPKYITAC EMVAEMVESL QSVLALGHRK NSGVPAFLTP LRRNIISLA
2401 RLPLVNSYTR VVPLVWKLW SPKPGDGTG APPEIPVEFL QEVEFKKEFI YRINTLWTS RTQFEETWAT LLGVLVTQPL VMEQESPE EDETRTQINV
2501 LAVQAITSIV LSAMTPVAV NPAVSCLEQQ PRNKPLKALD TRFGRKLSII RGIVEQEIQ MVSRENAT HHLYQAWDPV PSLSPATGA LISHEKLLQ
2601 INPERELGSM SYKLQVSIH SVWLGNSITP LREEWDEEE EEEADAPAPS SPPTSPVNSR KHRAGVDIHS CSQFLLELYS RWLPSSSAR RFPAILISEV
2701 VRSLLVSDI FTERNQFELM VYVTLTELRV HPESEDLAQ YLVPATCKAA AVLGMDKAVA EPVSRLLST LRSSHLPSPV GALHGVLYVL ECDLDDTAK
2801 QLIPVISDYL LSNLKGIAHC VNIHQHVL VMCATAFYLI ENYPLDVGPE FSASIIQMGV VMLSGSEEST PSIIYHCAIR GLERLLSEQ LSRIDAESIV
2901 KLSVDRNVH SPHRAMAALG LMLTCMYTGK EKVSPGRSTD PNPAPDSES VIVAMERSV LFDRIKGFPP CEARVVARIL PQFLDDFFPP QDIMNKVIGE
3001 FLSNQQYPQ FMATVYKVF QTLHSTGQSS MVRDWMVLSL SNFTQAPVA MATWSLSCFF VSASTSPWA AILPHVISRM GKLEQVDVNL FCLVATDFYR
3101 HQIEEELDRR AFQSVLEVA APGSPYHRL TCLRNVHKVT TC

```

**Figure S3.** Sequence coverage maps of A) HEK293 Q23 HTT from solution (77%) and B) from a gel band (62%) as obtained from bottom-up proteomics experiments.

A)

```

1  MATLEKLMKA FESLKSFOOQ QQQQQQQQQQ QQQQQQQQPP PPPPPPPPPQ LPQPPPAQAP LLPOQPQPPP PPPPPPGPAV AEEPLHRPKK ELSATKKDRV
101 NHCLTICENI VAQSVRNSE FQKLLGIAME LFLLCSDDAE SDVRMVADEC LNKVIFALMD SNLPRQLQEL YKRIKKNKGNP RSLRAALWRF AELAHLVRPQ
201 KCRPYLVNLL PCLTRTSKRP EESVQETLAA AVPKIMASFG NFANDNEIKV LLKAFIANLK SSSPTIRRTA AGSAVVICQH SRRTOYFYSW LNLVLLGLLV
301 PVEDEHSTLL ILGVLLTLRY LVPLLQQQVK DTSLKSGFVG TRKEMEVSPE AEQLVQVYEL TLHHTQHQDH NVVTGALELL QQLFRTPPPE LQLTLTAVGG
401 IGOQLTAAKEE SGGRSRSGSI VELIAGGGSS CSPVLSRKQK GKVLLGEEEA LEDDESERSD VSSSALTASV KDEISGELAA SSGVSTPGSA GHDIITEQPR
501 SQHTLQADSV DLASCDLTSS ATDGDDEEDIL SHSSSQVSAV PSDPAMDLDN GTQASSPISD SSQTTEGPD SAVTPSDSSE IVLDGTDNQY LGLTIGQPQD
601 EDEEATGILP DEASEAFRNS SMALQQAHLL KNMSHCRQPS DSSVDKQVLR DEATEPGDQE NKPCRIRKGI QGSTDDDSAP LVHCVRLLSA SFLLTGKKNV
701 LVPRDRVRS VKALALSCVG AVALHPESF FSKLYKVPDL TTEYPEEQVY SDILNYIDHG DPQVRGATAI LCGTLCISIL SRSRFHVGDW MGTIRTLTGN
801 TFSLADCIPL LRKTLKDESS VTCKLACTAV RNCVMSLCSY SYSELGQLI IDVLTNRSS YWLVRTLEL TLAEIDFRIV SFLEAKAENL HRGAHYHTGL
901 LKIQRFVNLN VVHLLGDGDD PRVRHVAAS LIRLVPKLFY KCDQQAQDPV VAVARDQSSV YLKLIMHETQ PPSHFVSVTI TRIYRGNLL PSITDVTMEN
1001 NLSRVIAAVS HELITSTTRA LTFGCCEALC LLSTAFFVCI WSLGWHCGVP PLSASDESRC SCTVGMATHI LTLSSAWFP LDLSAHQDAL ILAGNLLAAS
1101 APKSLRSSWA SEEEANPAAT KQEEVWPALG DRALVPMVEQ LFSHLLKVIN ICAHVLDLVA PGPAIKAALP SLTNPPSLSP IRRKQKEPE GEQASVPLSP
1201 KKGSEASAAS RQSDTSGPVT TSKSSSLGFS YHLPSYLKHL DVLKATHANY KVTLDLQNST EKFGGFLRSA LDVLSQILEL ATLQDQIGKCV EELIGYLKSC
1301 FSREPMMATV CVQQLLTKLF GTNLASQFDG LSSNPSKSG RAQRGSSSV RPLGYHYCFM APYTHFTQAL ADASLRNMVQ AEQENDTSGW FDLVQKVVSTQ
1401 LRTNLTSTVK NRADNNAHM HIRLFEPLVI KALFQYTTT CVQLQKQVLL LLAQLVQLRV NYCLLSDQV FIGFVLKQFE YIEVQGFRS EAIIPNIFFF
1501 LVLLSYERYH SKQIGIPKI IQLCDGIMAS GRKAVTHAIP ALQPIVHDLF VLRGTNKADA GKLELTQKEV VVSMMLRLIQ YHQVLEMFIL VLQOCHKENE
1601 DKWRLRSRQI ADIILMPLAK QQMHSDEHA LGLVNTLFEI LAPSSLRPVD MLLRSMFVTP NTMASVSTVQ LWSIGILAIL RVLSQSTED IVLSRIQELS
1701 FSPYLISCTV INRLRDGDS TLEEHSEGG QIKNLPEETF SRFLQLVGI LLEDIVTKQL KVEMSEQHT FYCQELGTLI MCLIHFKSG MFRRTAAAT
1801 RLFRRSDGCGG SFYTLDSLNL RARSMITTHP ALVLLWCQIL LLVNHDTYRW WAEVQQTPKR HSLSTKLLS PQMSGEEEDS DLAAKLGMCN REIVRRGALI
1901 LFCDYVCCNL HDSEHLTWLI VNIHQDLISL SHEPPVQDFI SAVHRNSAAS GLFIQAIQSR CENLSTPTML KATLQCLEGI HLSQSGAVLT LYVDRLLCTP
2001 FRVLARMVDI LACRVEMLL AANLQSSMAQ LPMEEENRQI EYLQSSGLAQ RHQRVLSLLD RFRSTMQDS LSPSPVSSH PLDGDGHVSL ETVSPDKDNY
2101 VHLVKSQCWT RSDSALLEGA ELVNRIPAE MNAFMNNSF NLSLLAPCLS LGMSEISGGQ KSALFEAARE VTLARVSGTV QQLPAVHHVF QELPAEPAA
2201 YWKLNDLFG DAALYQSLPT LARALAQYLV VVSKLPSHLH LPPEKERDIV KFVVATLEAL SWHLIHEQIP LSLDLQAGLD CCLALQLPG LWSVSSSTEF
2301 VTHACSLIYC VHFIEAVAV QPGEQLLSPE RRTNTPKATS EEEEEVDPT QNPKYITAC EMVAEMVESL QSVLALGHKR NSGVPAFLTP LRRNIISIA
2401 RLPLVNSYTR VVPLVWKLW SPKPGGDFGT AFPEIPVEFL QEKVEFKEFI YRINTLWTS RTQFEETWAT LLGVLVTPQL VMEQESPE EDTERTQINV
2501 LAVQAITSLV LSAMTVPVAG NPAVSCLEQQ PRNKPLKALD TRFGRKLSII RGLIVEQEIQA MVSRENAT HHLVQAWDPV PSLSPATTGA LISHEKLLQ
2601 INPERELGSM SYKLGQVSIH SVWLGNSITP LREEWDEEE EEBADAPAPS SPPTSVPNSR KHRAGVDIHS CSQFLELYS RWILPSSAR RTPAILISEV
2701 VRSLLVVDL FTERNQFELM VVTLTELRV HSEDELLAQ YLVPAKCAK AVLGMDKAVA EPVSRLEST LRSRHLPSRV GALHGVLYVL ECDLDDTAK
2801 QLIPVISDYL LSNLKGIAHC VNIHQYHVL VMCATAFYLI ENYPLDVGPE FSASITQMG VMLSGSEEST PSIIYHCLR GLERLLESEQ LSRIDAESIV
2901 KLSVDRVNHV SPHRAMAALG LMITCMYTGK EKVSPGRYTD PNPAAPEDES VIVAMERSV LFDRIKGFPP CEARVVARIL PQFLDDFFPP QDIMNKVIGE
3001 FLSNQQPYQP FMATVVYKVF QTLHSTGQSS MVRDWMVLSL SNFTQRPVPA MATWSLSCFF VSASTSPWA AILPHVISRY GKLEQVDVNL FCLVATDFXR
3101 HQIEEELDRR AFQSVLEVVA APGSPYHRLT TCLRNVHKVT TC

```

B)

```

1  MATLEKLMKA FESLKSFOOQ QQQQQQQQQQ QQQQQQQQPP PPPPPPPPPQ LPQPPPAQAP LLPOQPQPPP PPPPPPGPAV AEEPLHRPKK ELSATKKDRV
101 NHCLTICENI VAQSVRNSE FQKLLGIAME LFLLCSDDAE SDVRMVADEC LNKVIFALMD SNLPRQLQEL YKRIKKNKGNP RSLRAALWRF AELAHLVRPQ
201 KCRPYLVNLL PCLTRTSKRP EESVQETLAA AVPKIMASFG NFANDNEIKV LLKAFIANLK SSSPTIRRTA AGSAVVICQH SRRTOYFYSW LNLVLLGLLV
301 PVEDEHSTLL ILGVLLTLRY LVPLLQQQVK DTSLKSGFVG TRKEMEVSPE AEQLVQVYEL TLHHTQHQDH NVVTGALELL QQLFRTPPPE LQLTLTAVGG
401 IGOQLTAAKEE SGGRSRSGSI VELIAGGGSS CSPVLSRKQK GKVLLGEEEA LEDDESERSD VSSSALTASV KDEISGELAA SSGVSTPGSA GHDIITEQPR
501 SQHTLQADSV DLASCDLTSS ATDGDDEEDIL SHSSSQVSAV PSDPAMDLDN GTQASSPISD SSQTTEGPD SAVTPSDSSE IVLDGTDNQY LGLTIGQPQD
601 EDEEATGILP DEASEAFRNS SMALQQAHLL KNMSHCRQPS DSSVDKQVLR DEATEPGDQE NKPCRIRKGI QGSTDDDSAP LVHCVRLLSA SFLLTGKKNV
701 LVPRDRVRS VKALALSCVG AVALHPESF FSKLYKVPDL TTEYPEEQVY SDILNYIDHG DPQVRGATAI LCGTLCISIL SRSRFHVGDW MGTIRTLTGN
801 TFSLADCIPL LRKTLKDESS VTCKLACTAV RNCVMSLCSY SYSELGQLI IDVLTNRSS YWLVRTLEL TLAEIDFRIV SFLEAKAENL HRGAHYHTGL
901 LKIQRFVNLN VVHLLGDGDD PRVRHVAAS LIRLVPKLFY KCDQQAQDPV VAVARDQSSV YLKLIMHETQ PPSHFVSVTI TRIYRGNLL PSITDVTMEN
1001 NLSRVIAAVS HELITSTTRA LTFGCCEALC LLSTAFFVCI WSLGWHCGVP PLSASDESRC SCTVGMATHI LTLSSAWFP LDLSAHQDAL ILAGNLLAAS
1101 APKSLRSSWA SEEEANPAAT KQEEVWPALG DRALVPMVEQ LFSHLLKVIN ICAHVLDLVA PGPAIKAALP SLTNPPSLSP IRRKQKEPE GEQASVPLSP
1201 KKGSEASAAS RQSDTSGPVT TSKSSSLGFS YHLPSYLKHL DVLKATHANY KVTLDLQNST EKFGGFLRSA LDVLSQILEL ATLQDQIGKCV EELIGYLKSC
1301 FSREPMMATV CVQQLLTKLF GTNLASQFDG LSSNPSKSG RAQRGSSSV RPLGYHYCFM APYTHFTQAL ADASLRNMVQ AEQENDTSGW FDLVQKVVSTQ
1401 LRTNLTSTVK NRADNNAHM HIRLFEPLVI KALFQYTTT CVQLQKQVLL LLAQLVQLRV NYCLLSDQV FIGFVLKQFE YIEVQGFRS EAIIPNIFFF
1501 LVLLSYERYH SKQIGIPKI IQLCDGIMAS GRKAVTHAIP ALQPIVHDLF VLRGTNKADA GKLELTQKEV VVSMMLRLIQ YHQVLEMFIL VLQOCHKENE
1601 DKWRLRSRQI ADIILMPLAK QQMHSDEHA LGLVNTLFEI LAPSSLRPVD MLLRSMFVTP NTMASVSTVQ LWSIGILAIL RVLSQSTED IVLSRIQELS
1701 FSPYLISCTV INRLRDGDS TLEEHSEGG QIKNLPEETF SRFLQLVGI LLEDIVTKQL KVEMSEQHT FYCQELGTLI MCLIHFKSG MFRRTAAAT
1801 RLFRRSDGCGG SFYTLDSLNL RARSMITTHP ALVLLWCQIL LLVNHDTYRW WAEVQQTPKR HSLSTKLLS PQMSGEEEDS DLAAKLGMCN REIVRRGALI
1901 LFCDYVCCNL HDSEHLTWLI VNIHQDLISL SHEPPVQDFI SAVHRNSAAS GLFIQAIQSR CENLSTPTML KATLQCLEGI HLSQSGAVLT LYVDRLLCTP
2001 FRVLARMVDI LACRVEMLL AANLQSSMAQ LPMEEENRQI EYLQSSGLAQ RHQRVLSLLD RFRSTMQDS LSPSPVSSH PLDGDGHVSL ETVSPDKDNY
2101 VHLVKSQCWT RSDSALLEGA ELVNRIPAE MNAFMNNSF NLSLLAPCLS LGMSEISGGQ KSALFEAARE VTLARVSGTV QQLPAVHHVF QELPAEPAA
2201 YWKLNDLFG DAALYQSLPT LARALAQYLV VVSKLPSHLH LPPEKERDIV KFVVATLEAL SWHLIHEQIP LSLDLQAGLD CCLALQLPG LWSVSSSTEF
2301 VTHACSLIYC VHFIEAVAV QPGEQLLSPE RRTNTPKATS EEEEEVDPT QNPKYITAC EMVAEMVESL QSVLALGHKR NSGVPAFLTP LRRNIISIA
2401 RLPLVNSYTR VVPLVWKLW SPKPGGDFGT AFPEIPVEFL QEKVEFKEFI YRINTLWTS RTQFEETWAT LLGVLVTPQL VMEQESPE EDTERTQINV
2501 LAVQAITSLV LSAMTVPVAG NPAVSCLEQQ PRNKPLKALD TRFGRKLSII RGLIVEQEIQA MVSRENAT HHLVQAWDPV PSLSPATTGA LISHEKLLQ
2601 INPERELGSM SYKLGQVSIH SVWLGNSITP LREEWDEEE EEBADAPAPS SPPTSVPNSR KHRAGVDIHS CSQFLELYS RWILPSSAR RTPAILISEV
2701 VRSLLVVDL FTERNQFELM VVTLTELRV HSEDELLAQ YLVPAKCAK AVLGMDKAVA EPVSRLEST LRSRHLPSRV GALHGVLYVL ECDLDDTAK
2801 QLIPVISDYL LSNLKGIAHC VNIHQYHVL VMCATAFYLI ENYPLDVGPE FSASITQMG VMLSGSEEST PSIIYHCLR GLERLLESEQ LSRIDAESIV
2901 KLSVDRVNHV SPHRAMAALG LMITCMYTGK EKVSPGRYTD PNPAAPEDES VIVAMERSV LFDRIKGFPP CEARVVARIL PQFLDDFFPP QDIMNKVIGE
3001 FLSNQQPYQP FMATVVYKVF QTLHSTGQSS MVRDWMVLSL SNFTQRPVPA MATWSLSCFF VSASTSPWA AILPHVISRY GKLEQVDVNL FCLVATDFXR
3101 HQIEEELDRR AFQSVLEVVA APGSPYHRLT TCLRNVHKVT TC

```



**Figure S4.** Exemplary spectra of peptides identified after digesting HTT<sup>1-3144</sup> Q23 from Sf9 with pepsin (pH ~ 1). Full data can be found through PRIDE (Jones et al., 2006) with accession PXD010865.

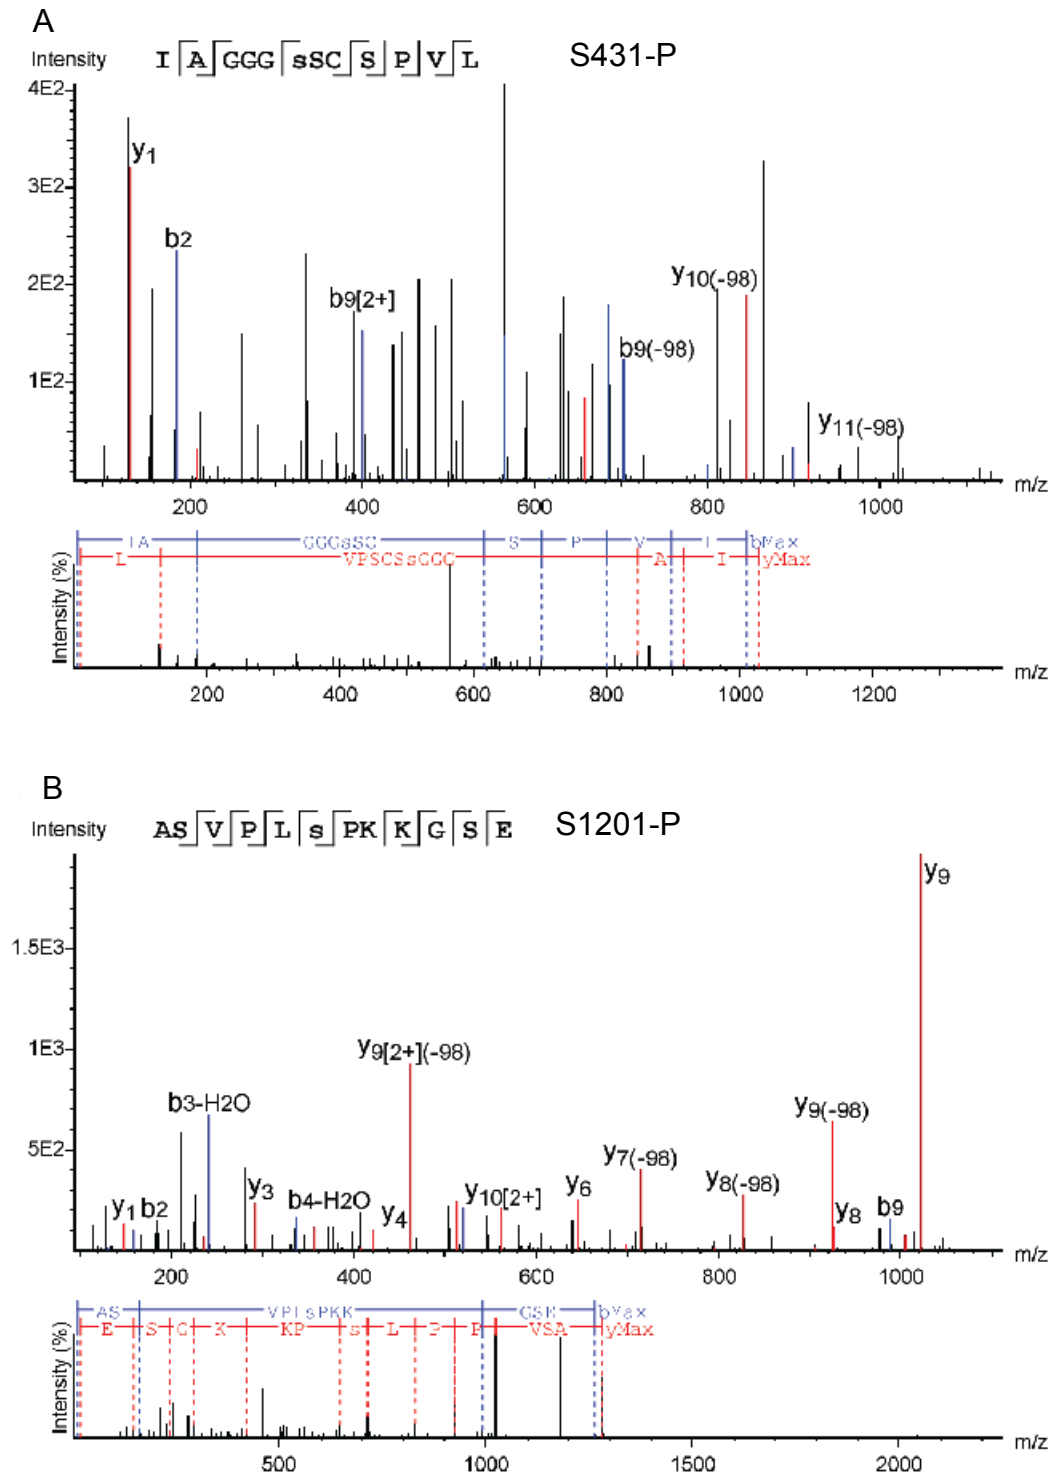

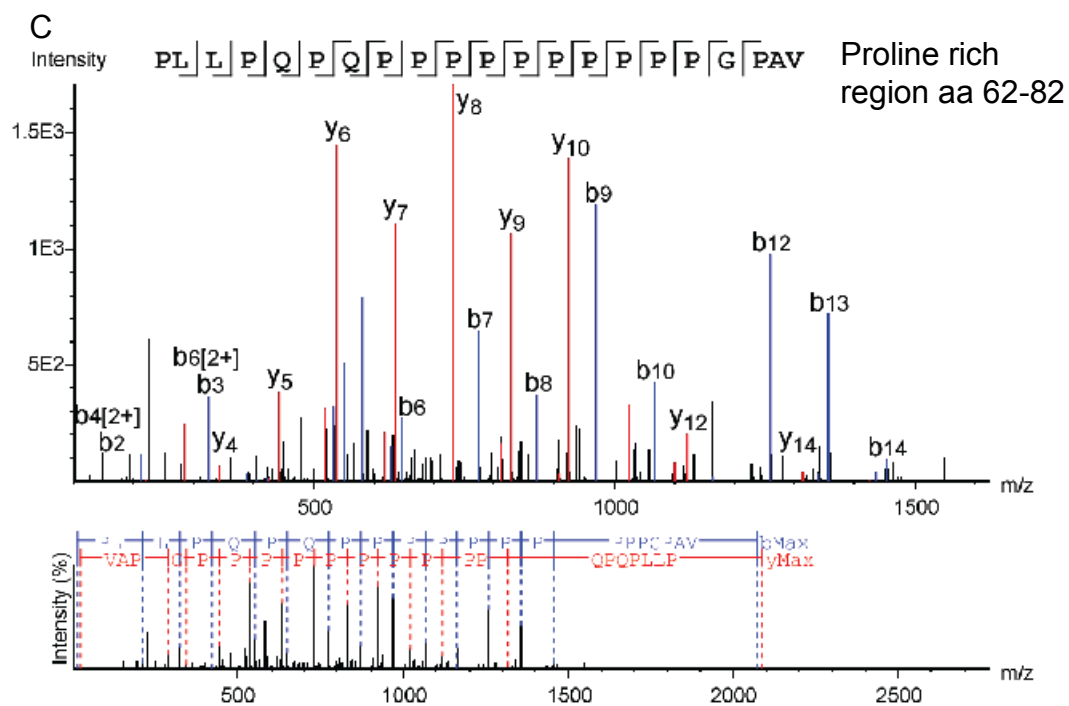

**Figure S5.** Exemplary spectra for peptides identified after digesting HTT<sup>1-3144</sup> Q23 from Sf9 with trypsin or lysarginase. Full data can be found through PRIDE (Jones et al., 2006) with accession PXD010865.

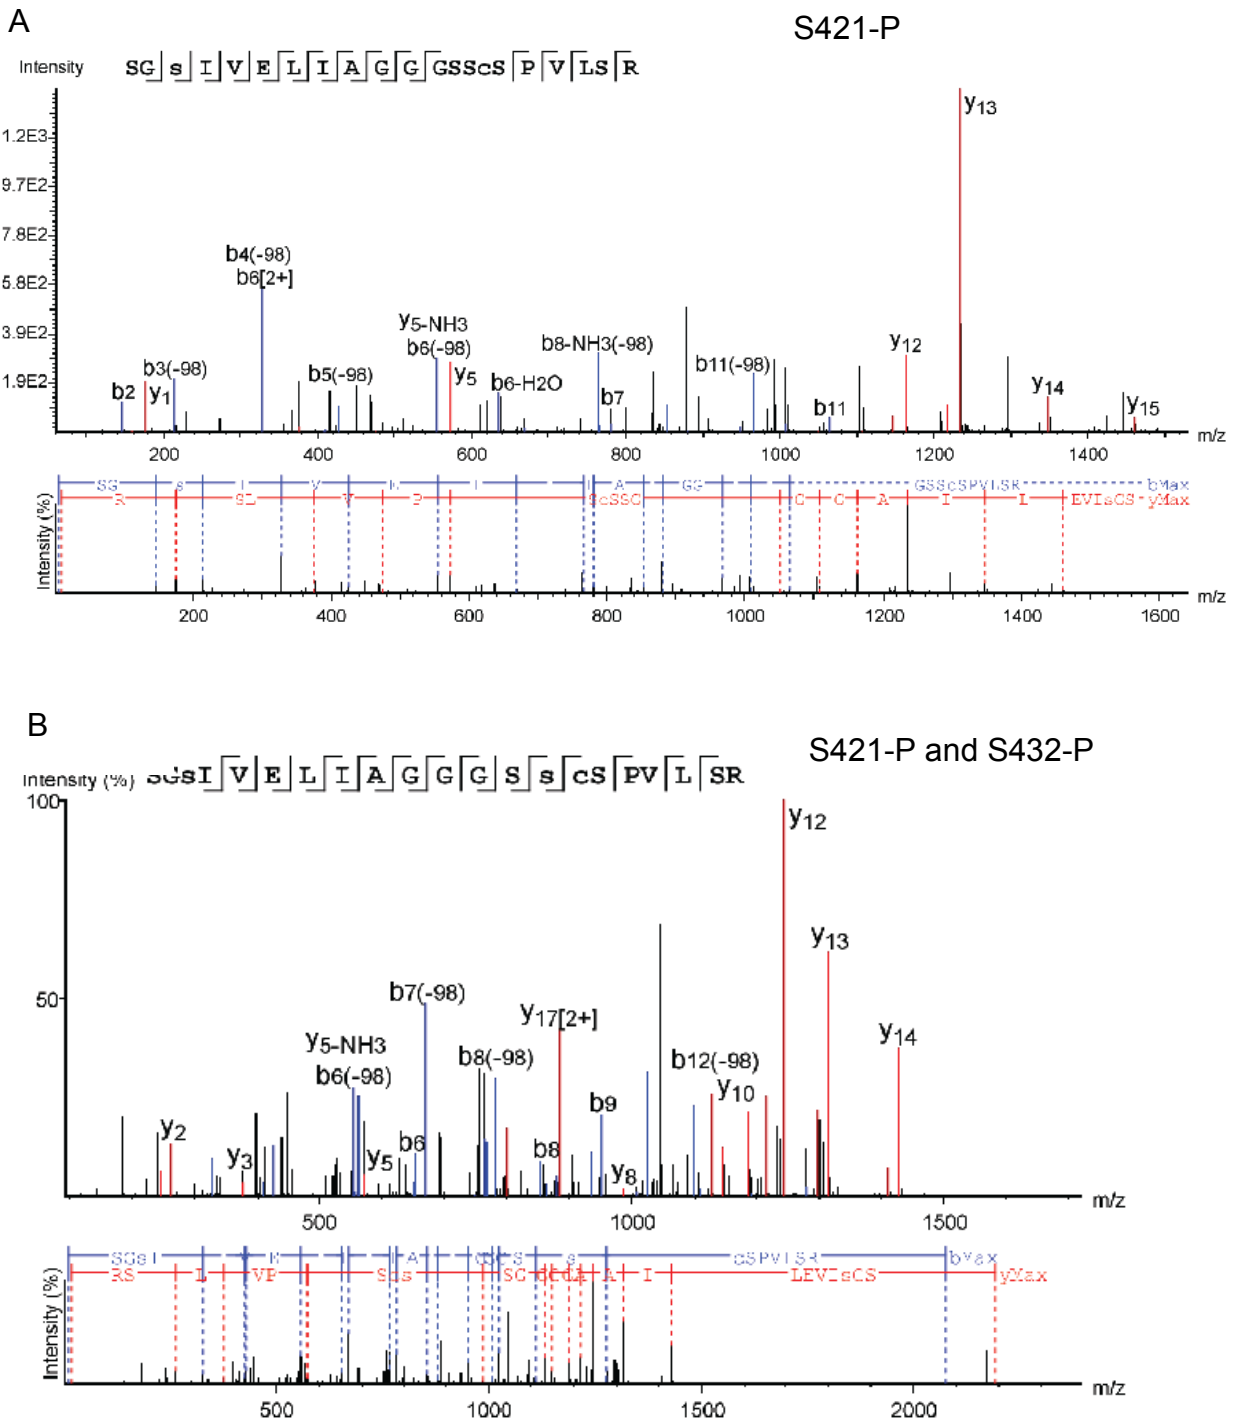



C

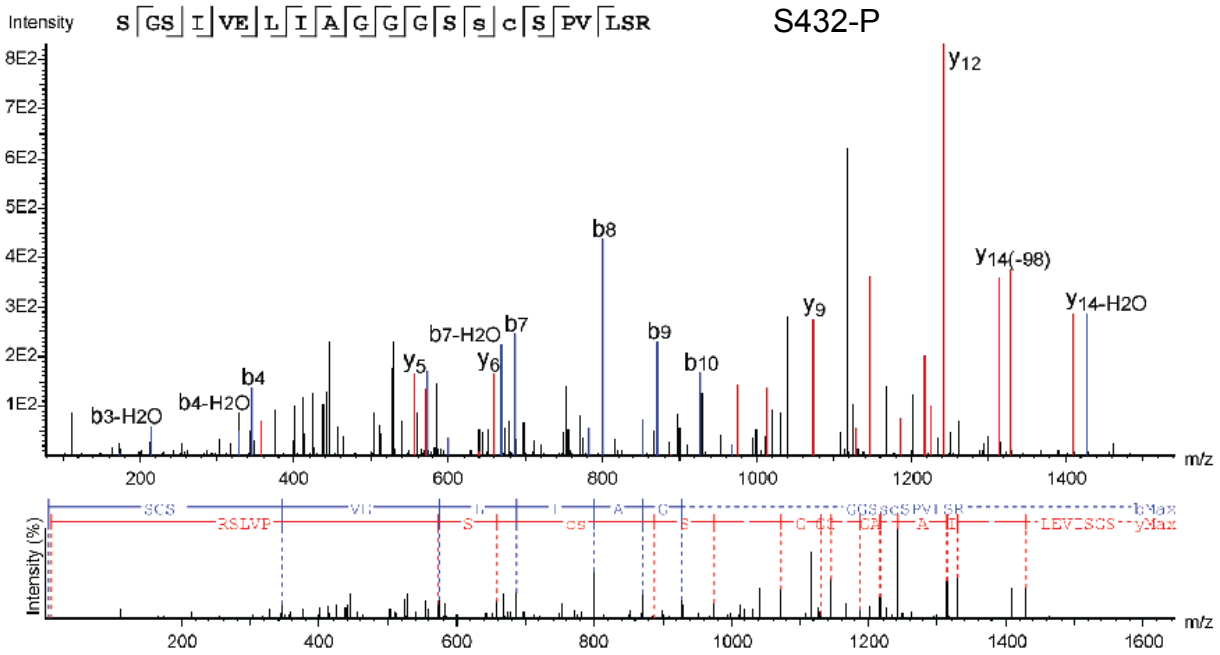

D

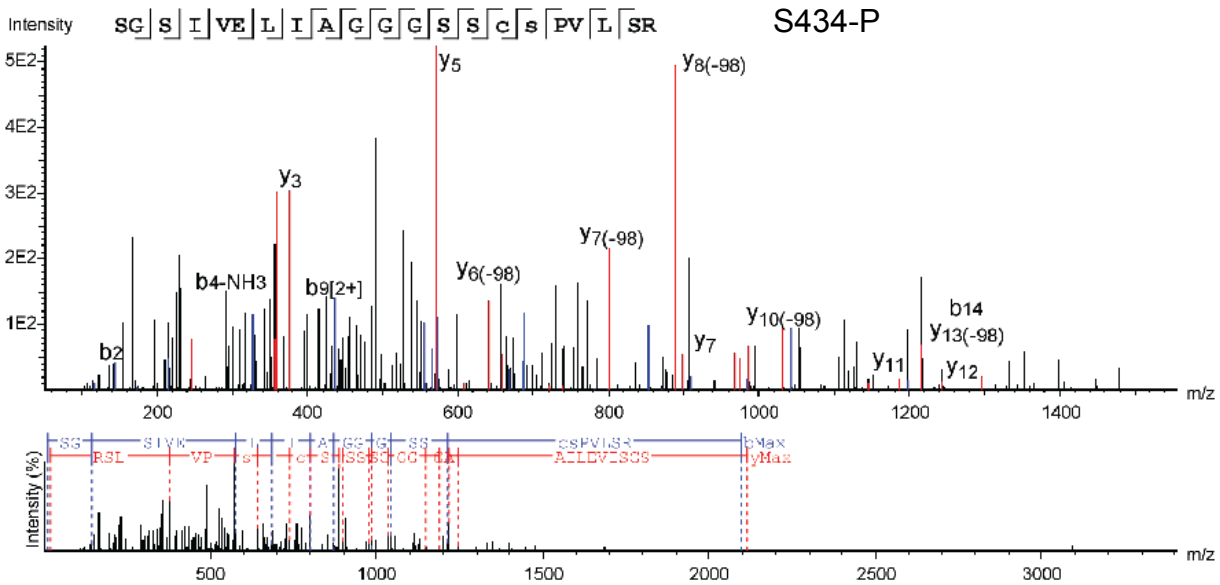

E

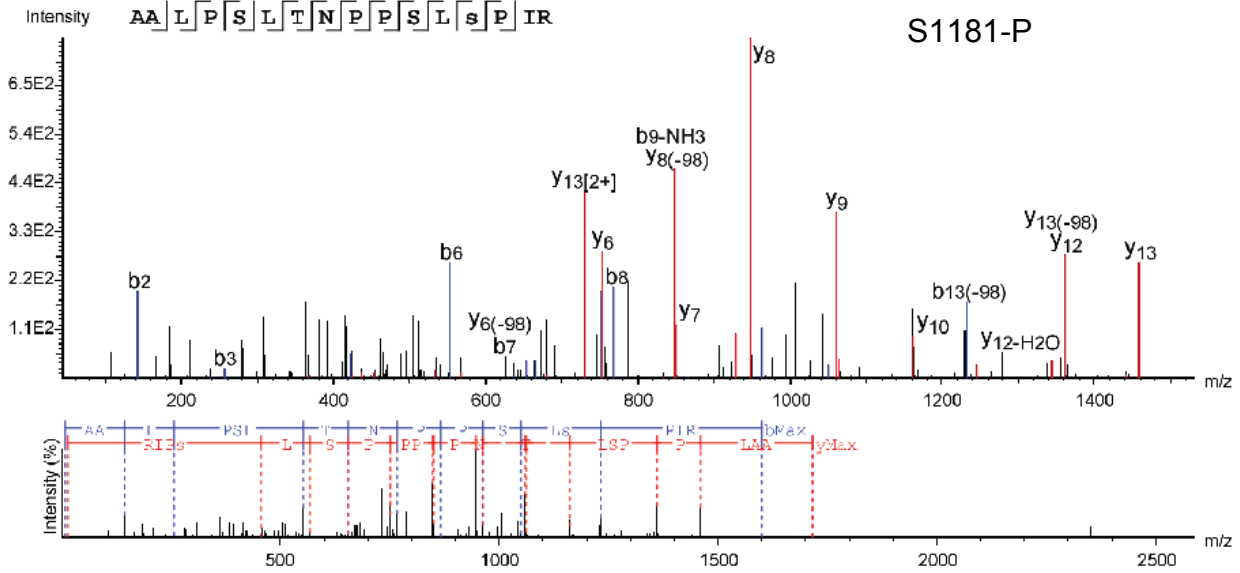

F

S1199

Intensity E P GE Q A S V P L s P K

S1201-P

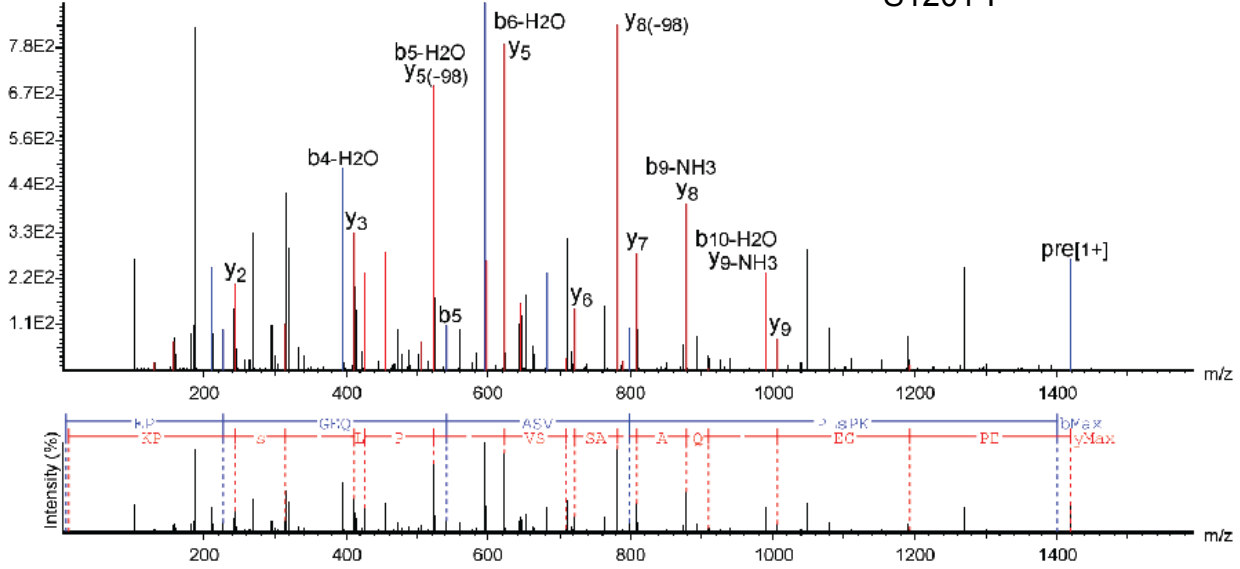

G

Intensity R H S L s S T K

S1866-P

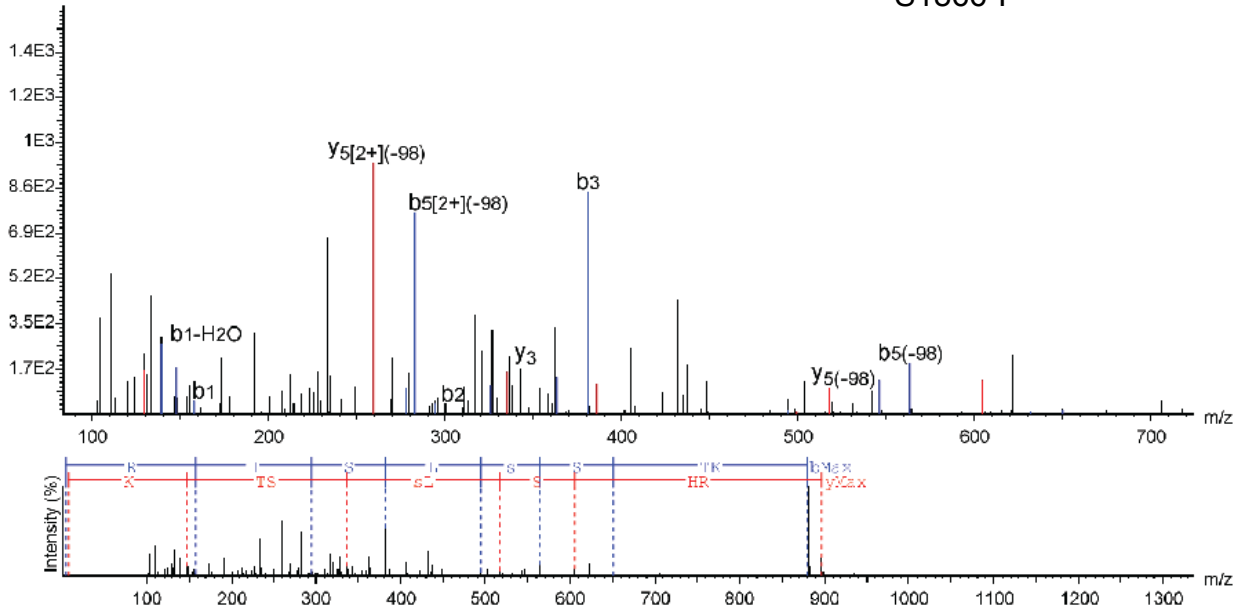

H

S1874

Intensity

LLSPPQMSEEDSDLAALK

S1876-P

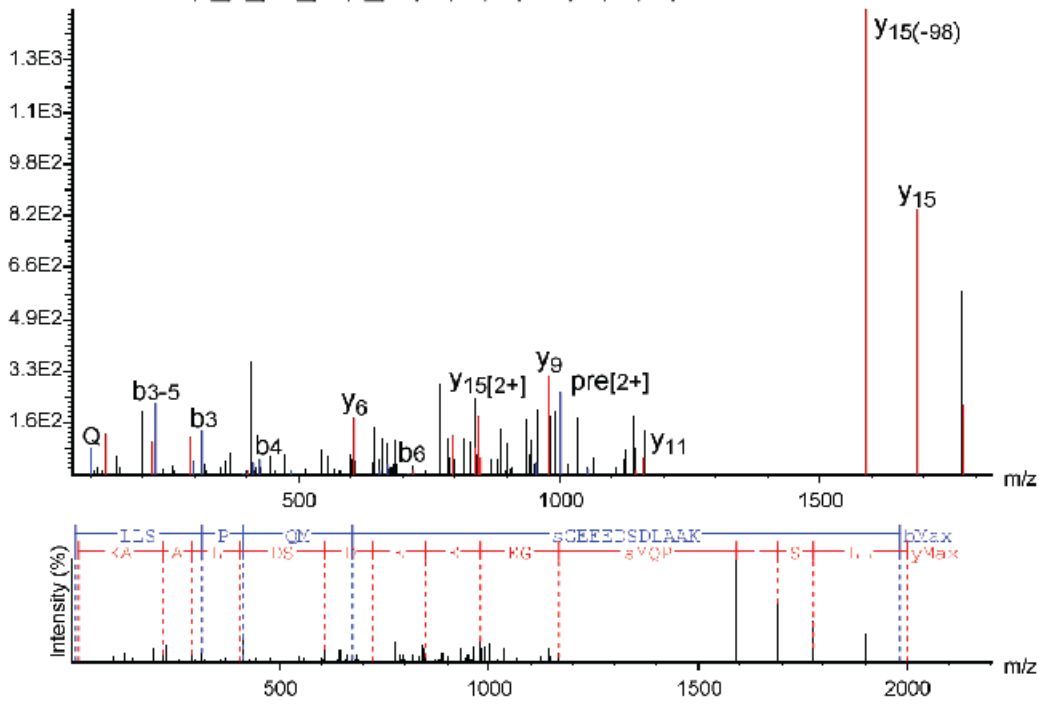

I

S2548

Intensity

s I I r G I V E Q E I Q A M V S K

S2550-P

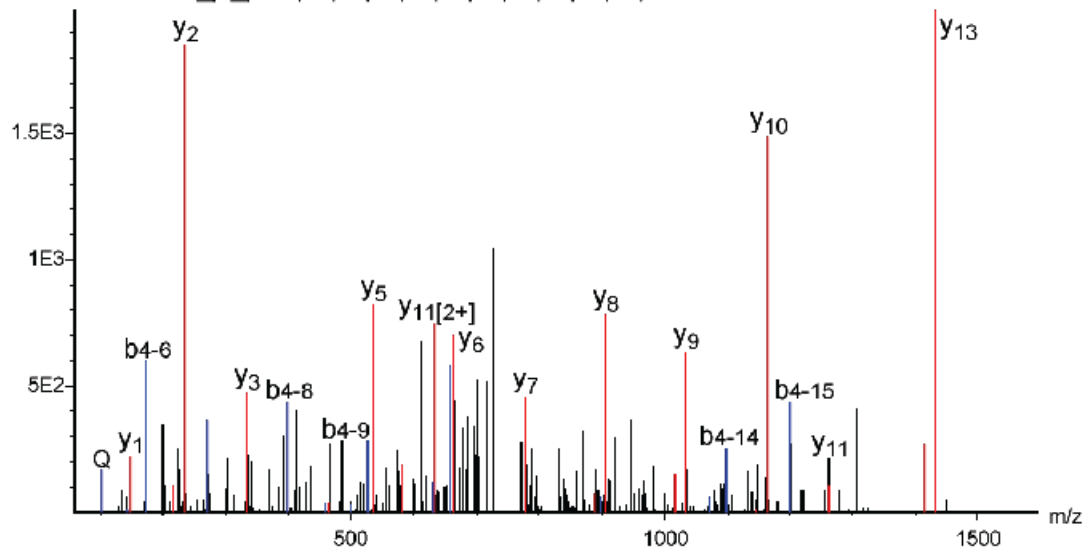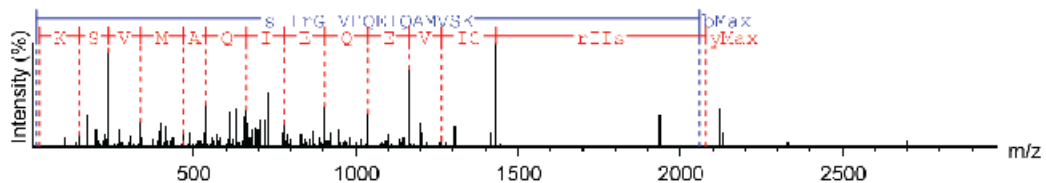

**Figure S6.** Exemplary spectra of peptides identified after digesting HTT<sup>1-3144</sup> Q23 from EXPI293F with trypsin. Full data can be found through PRIDE (Jones et al., 2006) with accession PXD010865.

**A**

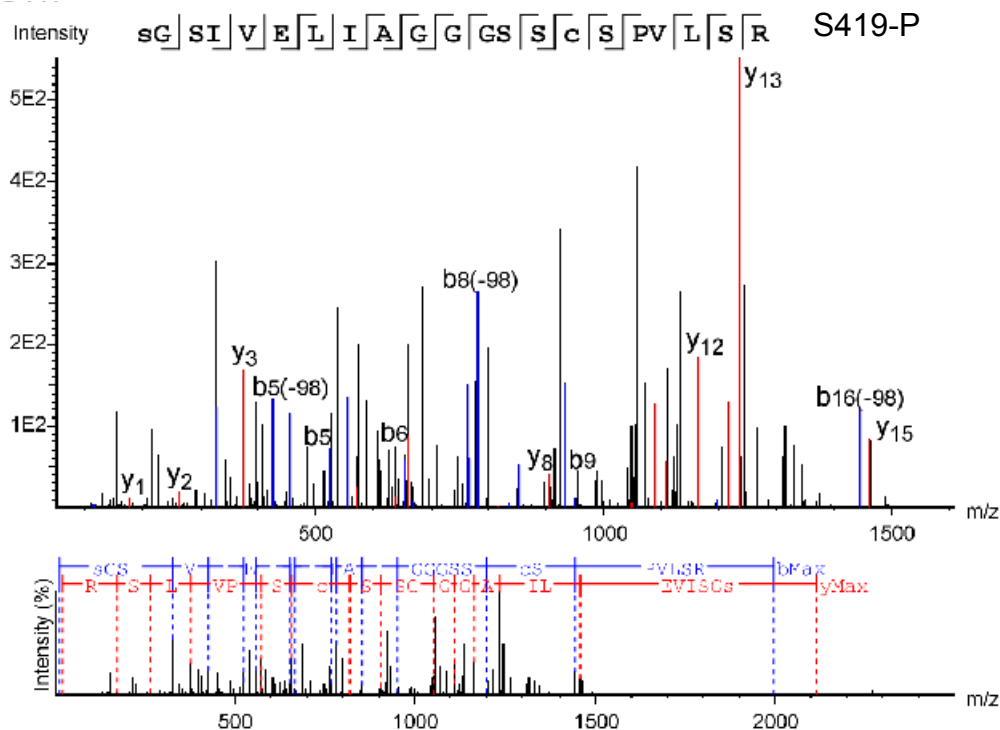

**B**

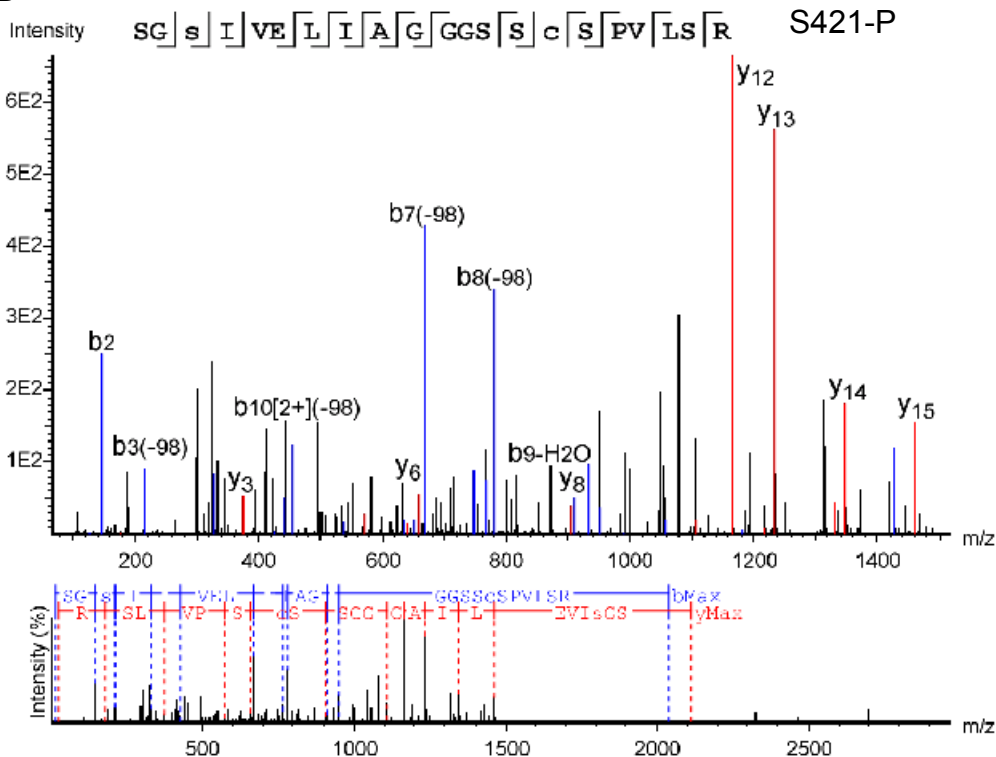

C

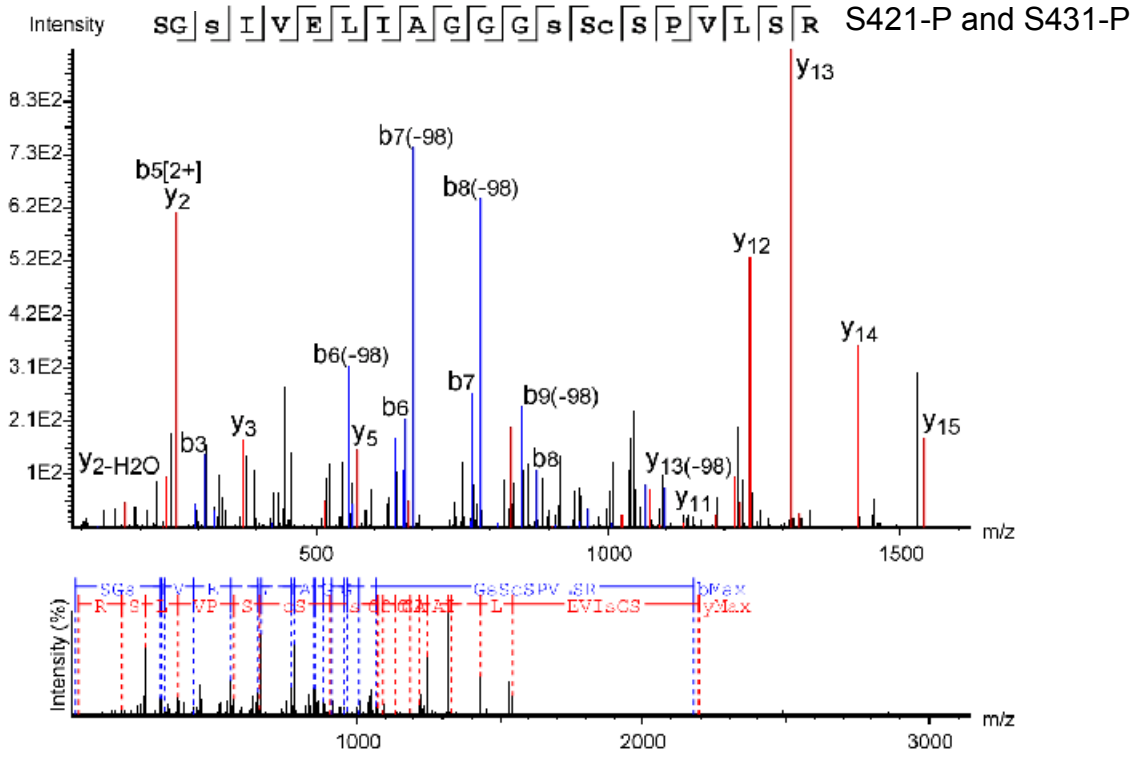

D

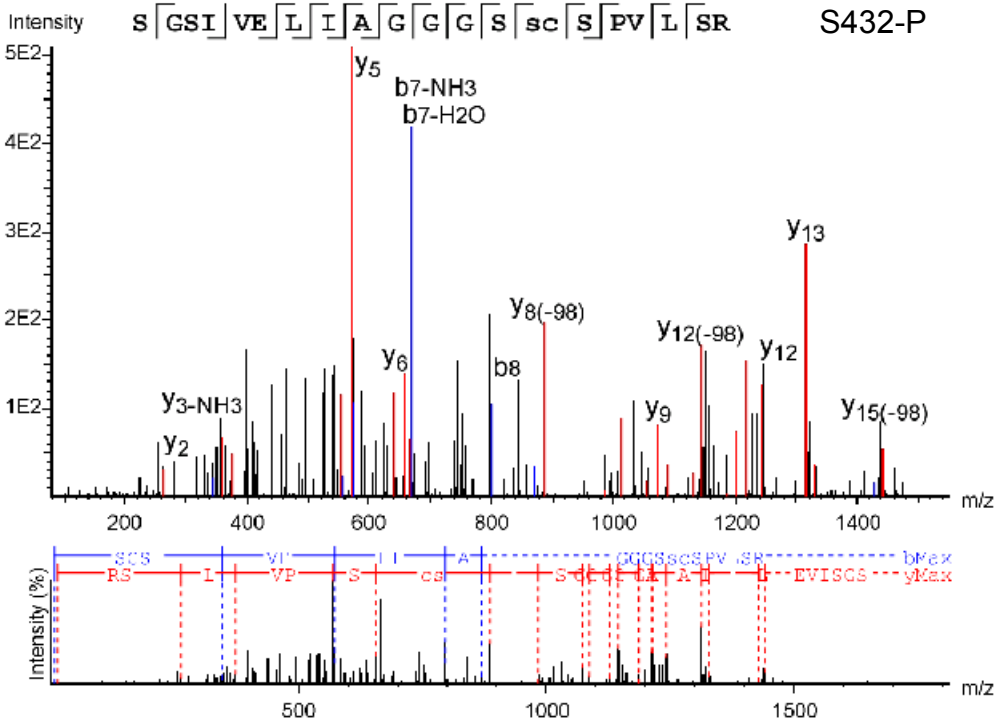



E

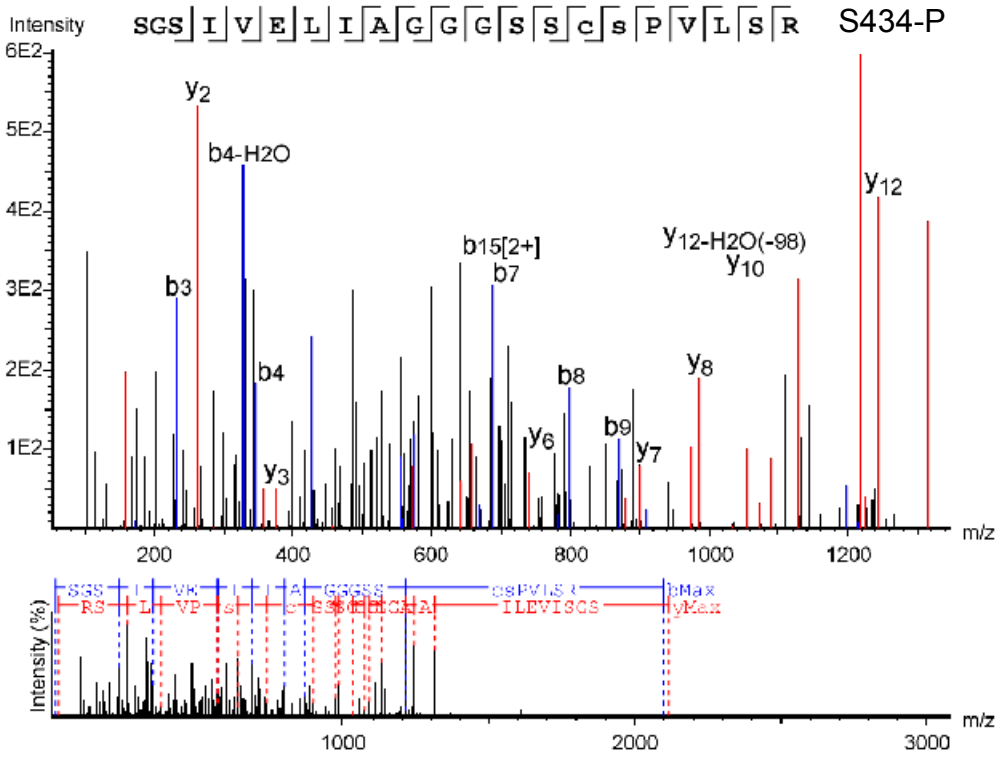

F

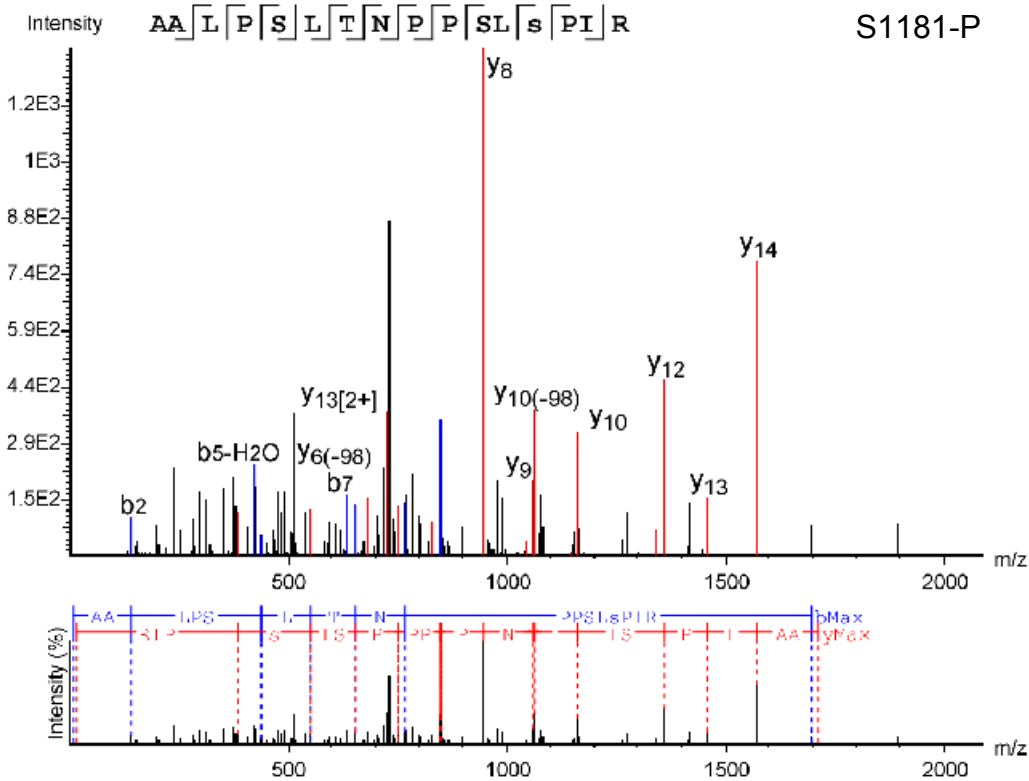

G

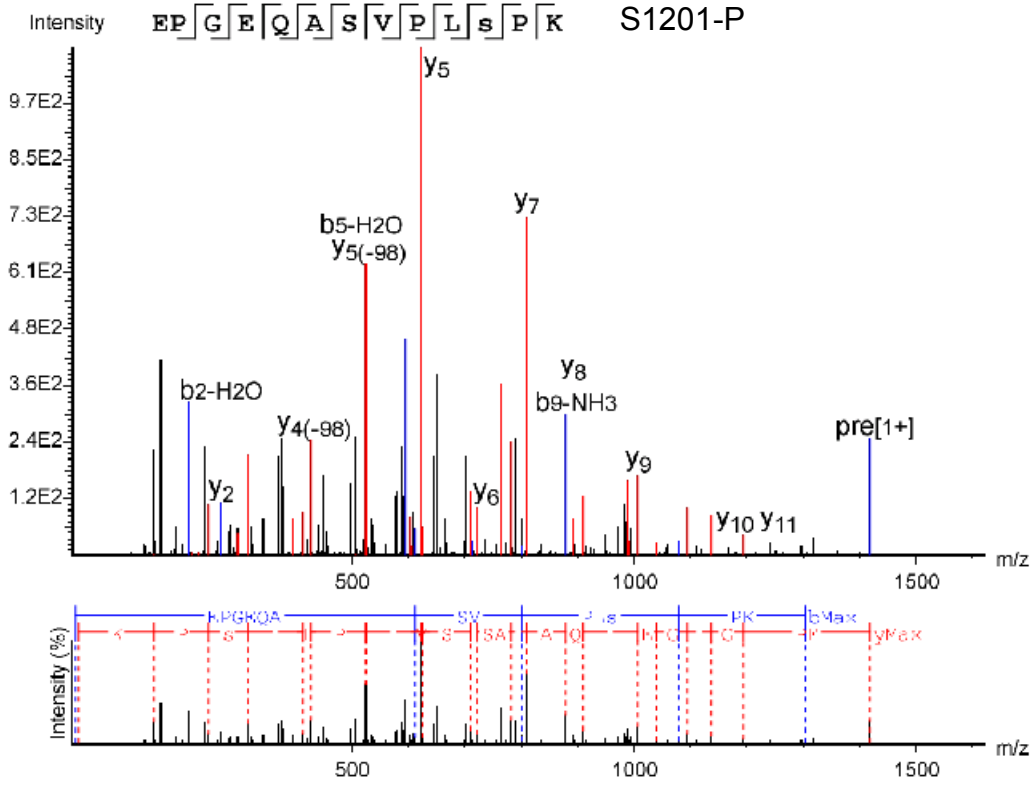

H

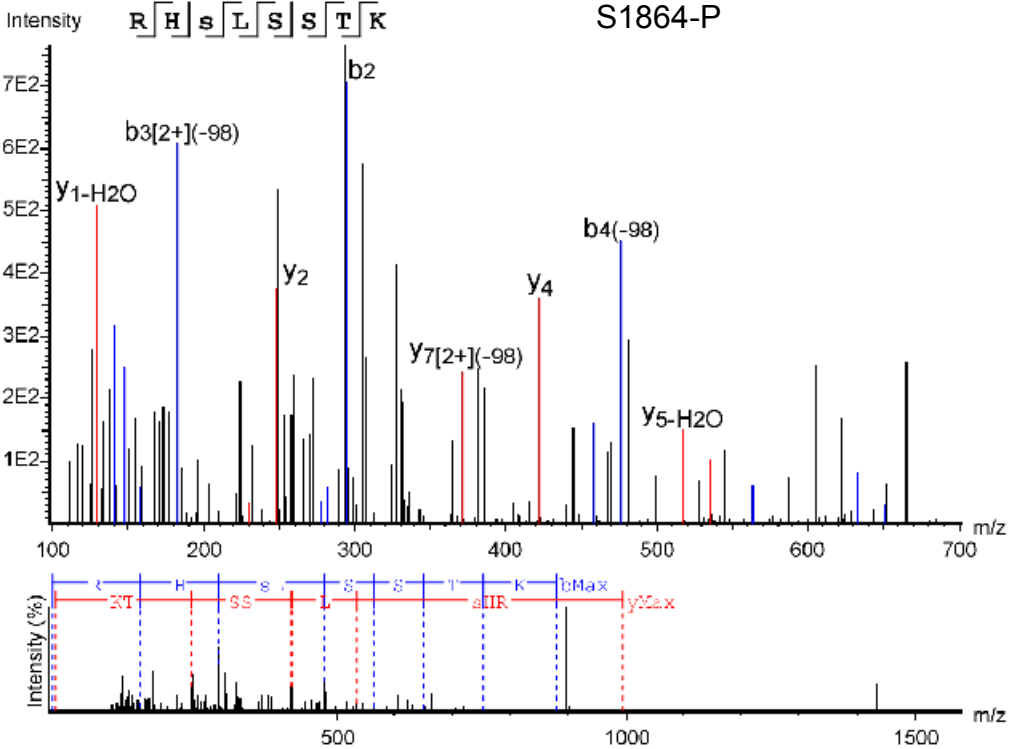

I

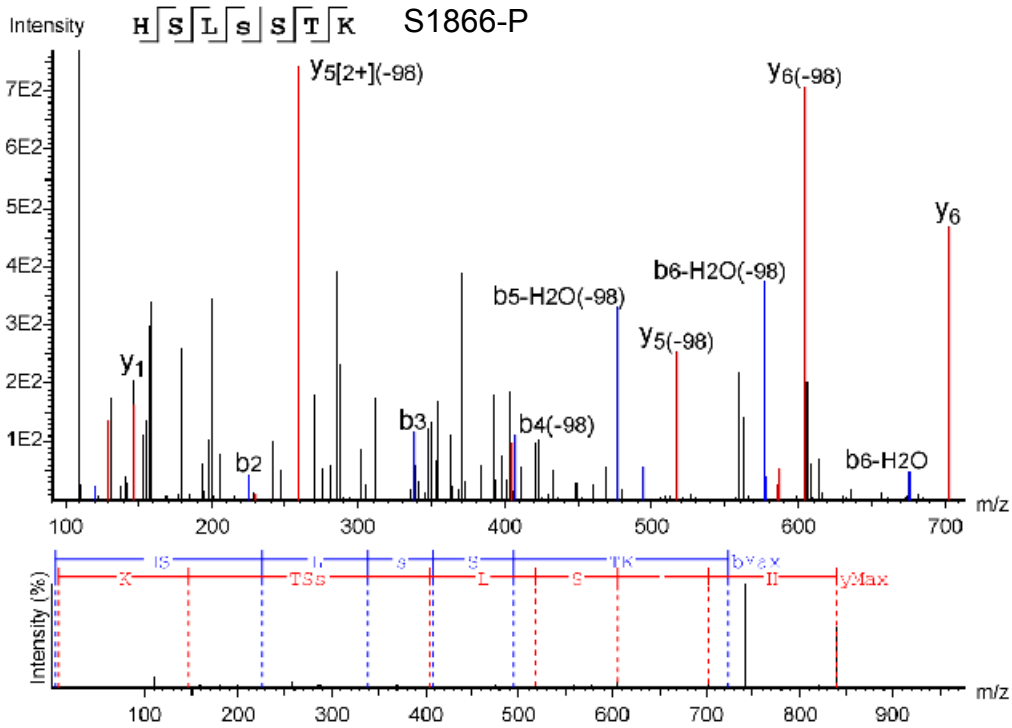

J

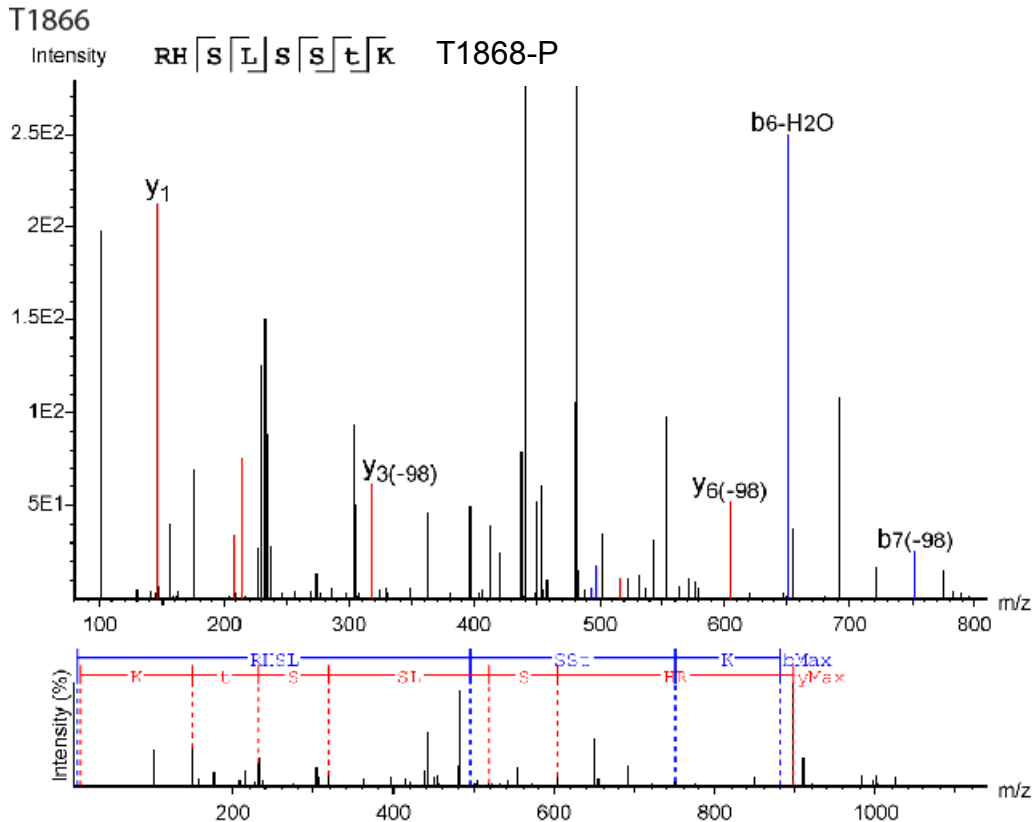

K

Intensity **SSH** L **PSr** V G A L H G V L Y V L E C D L L D D T A K R2781me

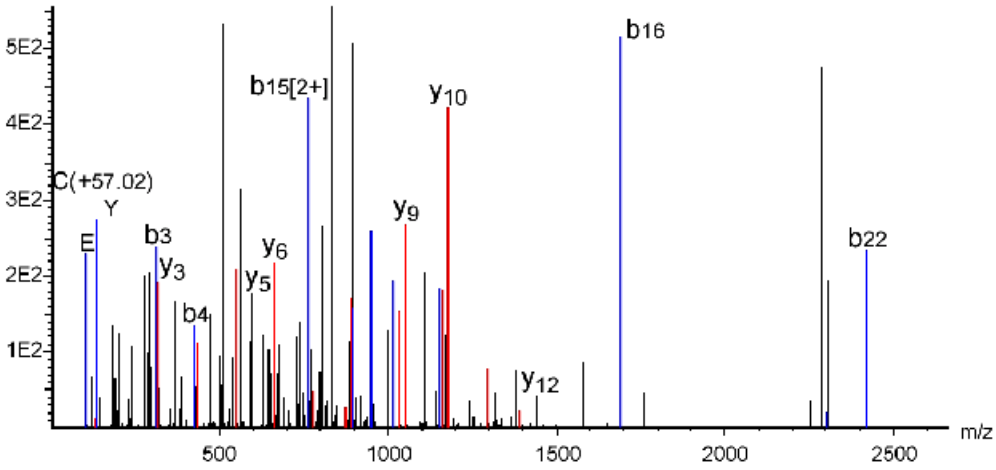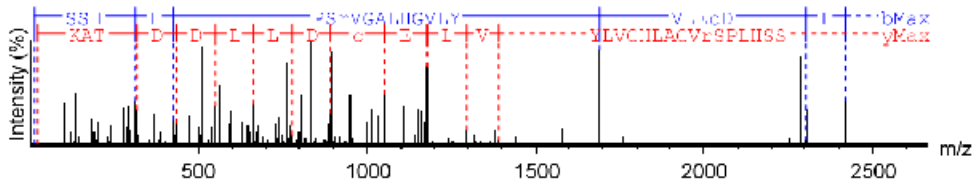

**Figure S7** – Mapping HTT posttranslational modifications identified from HTT<sup>1-3144</sup> samples from Sf9 and EXPI293 cells onto the HTT structure shows solvent accessibility of nearly all sites. HTT is viewed top-down looking through the void in the N-terminal HEAT domain on the right hand side. Phosphorylation sites are shown in pink and all other modification sites are shown in green. As these samples were expressed in the absence of the stabilising HAP40 protein, it is likely that the more conformationally flexible apo HTT protein molecule would have greater exposure of different HTT domain surfaces that would permit more sites to be modified than might be estimated from assessing the HTT-HAP40 molecule.

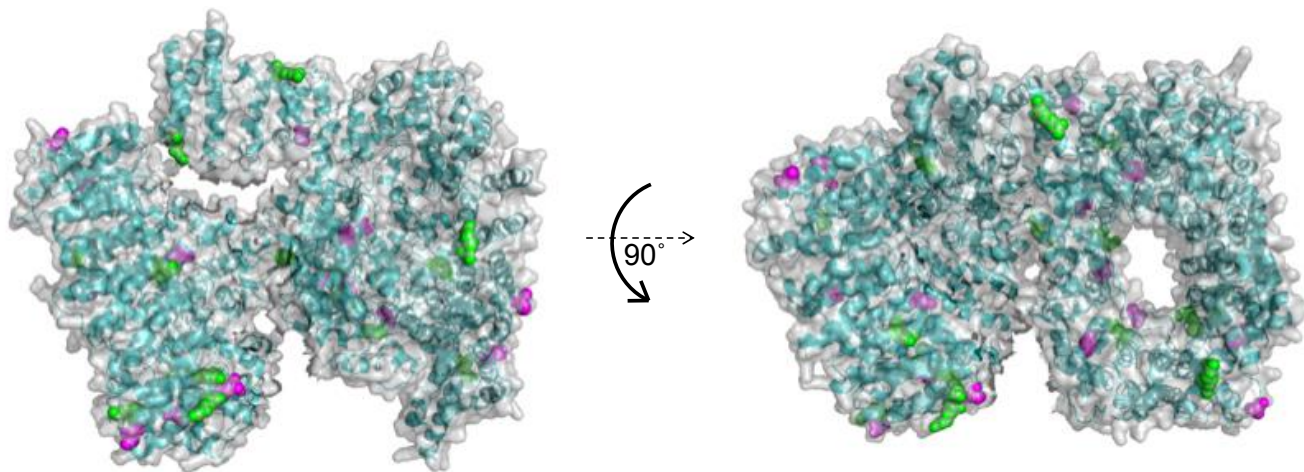

Supplement: Supplementary file [file media-1.pdf]
